# Supplementary material
Source: PubMed Central journal article supplement (PMC3575191)
Supplement: NIHMS438971-supplement-1_si_001.pdf [file NIHMS438971-supplement-1_si_001.pdf]

# Highly Enantioselective Direct Mannich Reactions of Unfunctionalized Ketones Catalyzed by Bifunctional Organocatalysts

Qunsheng Guo and John Cong-Gui Zhao\*

Department of Chemistry, University of Texas at San Antonio,

One UTSA Circle, San Antonio, TX 78249-0698

## Supporting Information

### Table of Content

|                                               |             |
|-----------------------------------------------|-------------|
| <b>Experimental Procedures .....</b>          | <b>S-1</b>  |
| <b>Proposed Transition State Models .....</b> | <b>S-3</b>  |
| <b>Compound Characterization Data .....</b>   | <b>S-5</b>  |
| <b>ORTEP Drawing of Compound 4k.....</b>      | <b>S-15</b> |
| <b>Copy of NMR Spectra .....</b>              | <b>S-16</b> |
| <b>Copy of HPLC Chromatograms .....</b>       | <b>S-38</b> |

## Experimental Procedures

### A. General information

The aldehydes used in this study were washed with aqueous NaHCO<sub>3</sub> solution, dried, and then distilled or recrystallized before use. All other reagents are commercial products and were used as received.

### B. General Experimental Procedure for the Mannich Reaction

To a mixture of the ketone (0.40 mmol), 4 Å molecular sieves (50.0 mg), and *p*-toluenesulfonamide (68.4 mg, 0.40 mmol) in toluene (0.2 mL) at 0 °C were added catalyst **9** (13.5 mg, 0.02 mmol, 10 mol %) and the aldehyde (0.20 mmol). The mixture was further stirred at 0 °C for the indicated time. Upon completion, the reaction mixture was directly transferred to a silica gel column and purified by column chromatography (4:4:1 CH<sub>2</sub>Cl<sub>2</sub>/hexane/ethyl acetate) to afford the Mannich products.

### C. Procedure for the Mannich Reaction of 2-Phenylacetaldehyde

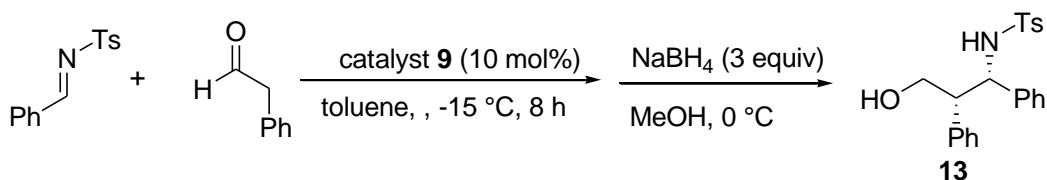

To a mixture of 2-phenylacetaldehyde (48.0 mg, 0.40 mmol) and (*E*)-*N*-benzylidene-4-methylbenzenesulfonamide (52.0 mg, 0.20 mmol) in toluene (2.0 mL) at -15 °C were added catalyst **9** (13.5 mg, 0.02 mmol, 10 mol %). After the reaction mixture had been stirred for 8 h at -15 °C, methanol (5.0 mL) and NaBH<sub>4</sub> (23.0 mg, 0.6 mmol) were added at 0 °C. The resulting reaction mixture was stirred for an additional 30 min at 0 °C before it was quenched with water (5 mL). The resulting mixture was extracted with ethyl acetate (10 mL × 3), and the combined organic phase was dried over Na<sub>2</sub>SO<sub>4</sub>. Purification by flash column chromatography on silica gel (ethyl acetate/hexane 1:2) gave the reduced Mannich product **13** (94 mg, 87% yield).

### D. Synthesis of the Protected Paclitaxel Side-Chain **16** from the Mannich Reaction Product **4r**

To a solution of **4r** (157.5 mg, 0.30 mmol) in CH<sub>2</sub>Cl<sub>2</sub> (10.0 mL) at room temperature was added *m*-chloroperoxybenzoic acid (135 mg, 77%, 0.60 mmol) and NaHCO<sub>3</sub> (50.4 mg, 0.6 mmol). The mixture was further stirred for 12 h at the same temperature. Then the reaction mixture was washed by water (5 mL). The organic phase was dried over Na<sub>2</sub>SO<sub>4</sub> and the solvent was removed under reduced pressure. The resulting crude mixture was purified by column chromatography (5:1 hexane/AcOEt) to afford product **14** (140 mg, 86% yield).

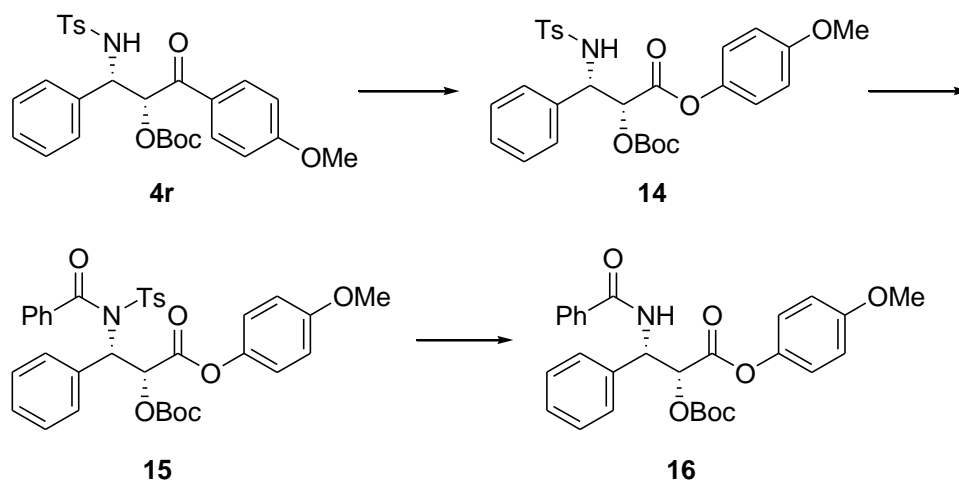

To a mixture of the compound **14** (108.0 mg, 0.20 mmol), 4-(dimethylamino)pyridine (4.5 mg, 0.04 mmol), benzoyl chloride (112.5 mg, 0.8 mmol) and Et<sub>3</sub>N (81.0 mg, 0.8 mmol) in THF (4.0 mL) at rt was added 4-(dimethylamino)pyridine (3.7 mg, 0.03 mmol, 10 mol %) with stirring. The mixture was further stirred for 24 h at rt. Then the solvent was removed under reduced pressure and the residue was directly transferred to a silica gel column and purified by column chromatography (6:1 hexane/ethyl acetate) to afford the Boc-Ts-protected product **15** as colorless oil.

To a mixture of the Boc-Ts-protected compound and HMPA (0.4 mL) in THF (4.0 mL) under argon at -78 °C was added SmI<sub>2</sub> (8.0 mL, 0.1 M solution in THF, 0.8 mmol). The mixture was then stirred at -78 °C for 0.5 h. Then the reaction mixture was quenched by adding aq. NaHCO<sub>3</sub> solution (10 mL) and extracted with AcOEt (2×10 mL). The combined organic phase was dried over Na<sub>2</sub>SO<sub>4</sub> and the solvent was then removed under reduced pressure. The resulting crude mixture was purified by column chromatography (5:1 hexane/AcOEt) to afford the Boc-protected product **16** (87 mg, 92%).

## Proposed Transition State Models

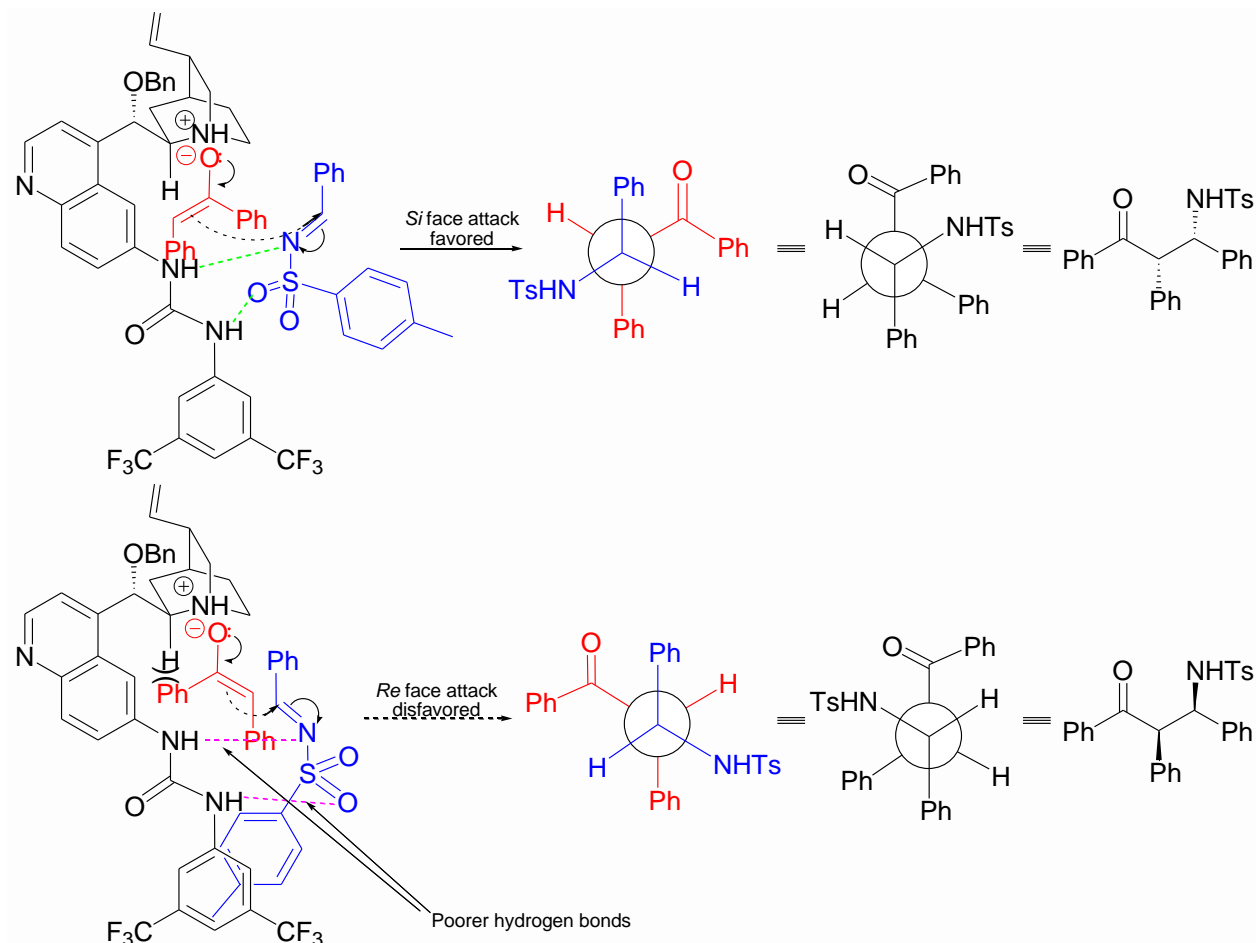

### Scheme S-1. Proposed Transition State Models for the Three-Component Mannich Reaction

The formation of the (2*S*,3*S*)-product may be rationalized by using proposed transition state models shown in Scheme S-1. After its formation, the *E*-enolate of the ketone is closely associated with the ammonium ion through ionic interactions. The *Re* face orientation of this enolate is favored over the *Si* face orientation since there are less steric interactions between the enolate and the catalyst backbone. Simultaneously, the imine intermediate forms hydrogen bonds with the thiourea moiety of the catalyst. Not only do these hydrogen bonds help to fix the orientation of the imine, but they also activate the imine for the Mannich reaction (as is evident from the data in Table 1, improved yields and ee values were obtained with the thiourea catalysts). Again the *Re* face orientation of the imine is favored over the *Si* face orientation due to stronger hydrogen-bonding in the first scenario (the orientation of the lone-pairs on nitrogen

and oxygen atom in the *Re* face orientation is more desirable for the hydrogen bonds between the imine and the thiourea). Thus, in the favored transition state, the attack of the enolate from back onto the *Si* face of the imine leads to the formation of the observed (2*S*,3*S*)-product.

## Compound Characterization Data

### (2*S*,3*S*)-1,2,3-Triphenyl-3-(tosylamino)propan-1-one (4a)

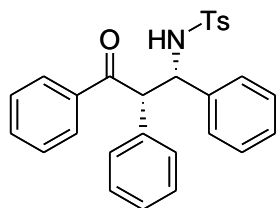

White solid, 88 mg, 96% yield, dr: > 99:1; m.p. 233-234 °C; <sup>1</sup>H NMR (300 MHz, *d*<sub>6</sub>-DMSO): δ 2.24 (s, 3H), 5.02 (t, *J* = 9.9 Hz, 1H), 5.24 (d, *J* = 11.1 Hz, 1H), 6.95-7.05 (m, 5H), 7.12 (d, *J* = 8.1 Hz, 2H), 7.20-7.26 (m, 5H), 7.33-7.51 (m, 5H), 7.72 (d, *J* = 7.2 Hz, 2H), 8.18 (d, *J* = 9.9 Hz, 1H); <sup>13</sup>C NMR (75 MHz, *d*<sub>6</sub>-DMSO): δ 21.7, 58.4, 58.7, 60.4, 60.9, 126.6, 126.8, 128.0, 128.2, 128.7, 129.3, 129.5, 129.7, 134.2, 135.6, 136.3, 136.9, 139.2, 141.3, 142.2, 197.6.  $\nu_{\text{max}}$ : 3331, 3058, 1667, 1595, 1492, 1445, 1327, 1275, 1153, 1070 cm<sup>-1</sup>. Analytic calcd. for C<sub>28</sub>H<sub>25</sub>NO<sub>3</sub>S: C, 73.82; H, 5.53; N, 3.07; found: C, 73.74; H, 5.53; N, 3.08.  $[\alpha]_{\text{D}}^{25} = -169.6$  (*c* 0.25, CH<sub>2</sub>Cl<sub>2</sub>, 96% ee). Enantiomeric excess of the product was measured by chiral stationary phase HPLC analysis using a Chiracel AD-H column (80:20 hexanes/*i*-PrOH at 1.0 mL/min): major enantiomer: *t*<sub>R</sub> = 18.8 min; minor enantiomer: *t*<sub>R</sub> = 14.0 min.

### (2*S*,3*S*)-3-(4-Methylphenyl)-1,2-diphenyl-3-(tosylamino)propan-1-one (4b)

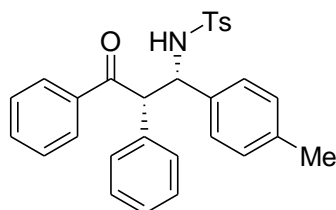

White solid, 89 mg, 95% yield, dr: > 99:1; m.p. 162-163 °C; <sup>1</sup>H NMR (300 MHz, *d*<sub>6</sub>-DMSO): δ 2.10 (s, 3H), 2.25 (s, 3H), 4.97 (t, *J* = 7.5 Hz, 1H), 5.23 (d, *J* = 11.1 Hz, 1H), 6.80 (d, *J* = 7.8 Hz, 2H), 6.95 (d, *J* = 8.1 Hz, 2H), 7.07-7.23 (m, 7H), 7.33-7.51 (m, 5H), 7.72 (d, *J* = 8.1 Hz, 2H), 8.08 (d, *J* = 8.7 Hz, 1H); <sup>13</sup>C NMR (75 MHz, *d*<sub>6</sub>-DMSO): δ 20.6, 20.9, 57.7, 59.4, 125.9, 127.2, 127.3, 127.9, 128.1, 128.4, 128.6, 128.7, 128.9, 133.4, 135.4, 135.5, 135.8, 137.5, 138.3, 141.3, 196.7.  $\nu_{\text{max}}$ : 3305, 1666, 1595, 1448, 1323, 1275, 1155, 1058 cm<sup>-1</sup>. Analytic calcd. for C<sub>29</sub>H<sub>27</sub>NO<sub>3</sub>S: C, 74.17; H, 5.80; N, 2.98; found: C, 74.31; H, 5.80; N, 2.98.  $[\alpha]_{\text{D}}^{25} = -151.2$  (*c* 0.25, CH<sub>2</sub>Cl<sub>2</sub>, 96% ee). Enantiomeric excess of the product was measured by chiral stationary phase HPLC analysis using a Chiracel AD-H column (80:20 hexanes/*i*-PrOH at 1.0 mL/min): major enantiomer: *t*<sub>R</sub> = 19.8 min; minor enantiomer: *t*<sub>R</sub> = 15.2 min.

### (2*S*,3*S*)-3-(4-Methoxyphenyl)-1,2-diphenyl-3-(tosylamino)propan-1-one (4c)

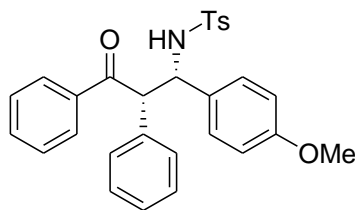

White solid, 86 mg, 88% yield, dr: > 99:1; m.p. 252-253 °C;  $^1\text{H}$  NMR (300 MHz,  $d_6$ -DMSO):  $\delta$  2.25 (s, 3H), 3.59 (s, 3H), 4.97 (t,  $J$  = 9.9 Hz, 1H), 5.21 (d,  $J$  = 11.1 Hz, 1H), 6.55 (d,  $J$  = 8.1 Hz, 2H), 6.97 (d,  $J$  = 8.1 Hz, 2H), 7.09-7.27 (m, 7H), 7.34-7.52 (m, 5H), 7.72 (d,  $J$  = 8.1 Hz, 2H), 8.04 (d,  $J$  = 8.1 Hz, 1H);  $^{13}\text{C}$  NMR (75 MHz,  $d_6$ -DMSO):  $\delta$  20.8, 54.8, 57.9, 59.1, 112.9, 125.9, 127.1, 127.9, 128.3, 128.5, 128.6, 128.7, 128.8, 132.4, 135.5, 135.6, 138.3, 141.2, 157.8, 196.8.  $\nu_{\text{max}}$ : 3311, 1665, 1594, 1514, 1443, 1325, 1277, 1248, 1151, 1075  $\text{cm}^{-1}$ . Analytic calcd. for  $\text{C}_{29}\text{H}_{27}\text{NO}_4\text{S}$ : C, 71.73; H, 5.60; N, 2.88; found: C, 71.92; H, 5.52; N, 2.90.  $[\alpha]_{\text{D}}^{25}$  = -180.0 ( $c$  0.3,  $\text{CH}_2\text{Cl}_2$ , 96% ee). Enantiomeric excess of the product was measured by chiral stationary phase HPLC analysis using a Chiracel OD-H column (90:10 hexanes/*i*-PrOH at 1.0 mL/min): major enantiomer:  $t_{\text{R}}$  = 18.3 min; minor enantiomer:  $t_{\text{R}}$  = 12.2 min.

**(2S,3S)-3-(4-Fluorophenyl)-1,2-diphenyl-3-(tosylamino)propan-1-one (4d)**

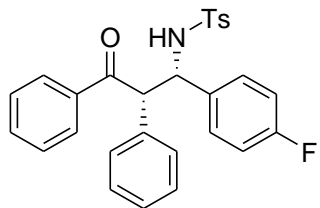

White solid, 91 mg, 96% yield, dr: > 99:1; m.p. 227-228 °C;  $^1\text{H}$  NMR (300 MHz,  $d_6$ -DMSO):  $\delta$  2.24 (s, 3H), 5.01 (t,  $J$  = 10.8 Hz, 1H), 5.21 (d,  $J$  = 11.1 Hz, 1H), 6.83 (t,  $J$  = 8.7 Hz, 2H), 6.98 (d,  $J$  = 8.1 Hz, 2H), 7.13 (d,  $J$  = 8.1 Hz, 2H), 7.20-7.27 (m, 5H), 7.33-7.51 (m, 5H), 7.72 (d,  $J$  = 7.8 Hz, 2H), 8.17 (d,  $J$  = 9.9 Hz, 1H);  $^{13}\text{C}$  NMR (75 MHz,  $d_6$ -DMSO):  $\delta$  21.7, 58.8, 59.7, 115.0, 115.3, 126.7, 128.1, 128.7, 129.2, 129.5, 129.6, 130.2, 130.3, 134.2, 136.2, 137.4, 139.0, 142.3, 160.0, 163.2, 197.6.  $\nu_{\text{max}}$ : 3314, 1662, 1595, 1510, 1447, 1325, 1277, 1227, 1152, 1095, 1076  $\text{cm}^{-1}$ . Analytic calcd. for  $\text{C}_{28}\text{H}_{24}\text{FNO}_3\text{S}$ : C, 71.02; H, 5.11; N, 2.96; found: C, 70.50; H, 5.17; N, 2.88.  $[\alpha]_{\text{D}}^{25}$  = -115.6 ( $c$  0.3,  $\text{CH}_2\text{Cl}_2$ , 95% ee). Enantiomeric excess of the product was measured by chiral stationary phase HPLC analysis using a Chiracel OD-H column (90:10 hexanes/*i*-PrOH at 0.8 mL/min): major enantiomer:  $t_{\text{R}}$  = 18.8 min; minor enantiomer:  $t_{\text{R}}$  = 27.7 min.

**(2S,3S)-3-(4-Chlorophenyl)-1,2-diphenyl-3-(tosylamino)propan-1-one (4e)**

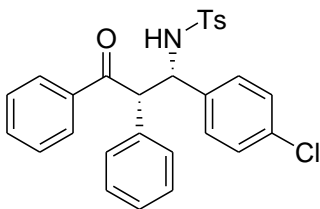

White solid, 93 mg, 95% yield, dr: > 99:1; m.p. 235-237 °C;  $^1\text{H}$  NMR (300 MHz,  $d_6$ -DMSO):  $\delta$  2.26 (s, 3H), 4.99 (t,  $J$  = 10.5 Hz, 1H), 5.21 (d,  $J$  = 11.1 Hz, 1H), 6.98 (d,  $J$  = 8.1 Hz, 2H), 7.05 (d,  $J$  =

8.1 Hz, 2H), 7.12 (d,  $J = 8.1$  Hz, 2H), 7.21-7.27 (m, 5H), 7.34-7.51(m, 5H), 7.12 (d,  $J = 8.1$  Hz, 2H), 8.19 (d,  $J = 9.9$  Hz, 1H);  $^{13}\text{C}$  NMR (75 MHz,  $d_6$ -DMSO):  $\delta$  20.9, 57.7, 59.0, 125.9, 127.3, 127.6, 127.9, 128.4, 128.7, 128.8, 129.3, 131.4, 133.5, 135.2, 135.3, 138.0, 139.2, 141.6, 196.6.  $\nu_{\text{max}}$ : 3307, 1663, 1595, 1491, 1446, 1326, 1277, 1151, 1076  $\text{cm}^{-1}$ . Analytic calcd. for  $\text{C}_{28}\text{H}_{24}\text{ClNO}_3\text{S}$ : C, 68.63; H, 4.94; N, 2.86; found: C, 68.71; H, 4.99; N, 2.85.  $[\alpha]_{\text{D}}^{25} = -150.8$  ( $c$  0.24,  $\text{CH}_2\text{Cl}_2$ , 94% ee). Enantiomeric excess of the product was measured by chiral stationary phase HPLC analysis using a Chiracel AD-H column (90:10 hexanes/*i*-PrOH at 1.0 mL/min): major enantiomer:  $t_{\text{R}} = 34.8$  min; minor enantiomer:  $t_{\text{R}} = 41.7$  min.

**(2*S*,3*S*)-3-(4-Bromophenyl)-1,2-diphenyl-3-(tosylamino)propan-1-one (4f)**

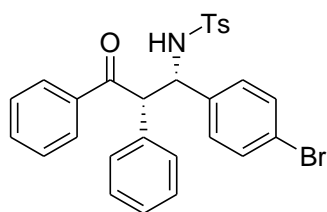

White solid, 104 mg, 97% yield, dr: > 99:1; m.p. 255-256 °C;  $^1\text{H}$  NMR (300 MHz,  $d_6$ -DMSO):  $\delta$  2.28 (s, 3H), 4.97 (t,  $J = 10.8$  Hz, 1H), 5.22 (d,  $J = 11.1$  Hz, 1H), 6.98 (d,  $J = 8.1$  Hz, 2H), 7.11-7.28 (m, 8H), 7.34-7.52(m, 5H), 7.74 (d,  $J = 8.1$  Hz, 2H), 8.19 (d,  $J = 9.9$  Hz, 1H);  $^{13}\text{C}$  NMR (75 MHz,  $d_6$ -DMSO):  $\delta$  20.9, 57.6, 59.1, 120.1, 125.9, 127.3, 127.9, 128.5, 128.7, 128.8, 129.7, 130.5, 133.5, 135.2, 135.3, 138.0, 139.6, 141.6, 196.6.  $\nu_{\text{max}}$ : 3302, 1663, 1594, 1489, 1447, 1322, 1275, 1154, 1060, 1009  $\text{cm}^{-1}$ . Analytic calcd. for  $\text{C}_{28}\text{H}_{24}\text{BrNO}_3\text{S}$ : C, 62.92; H, 4.53; N, 2.62; found: C, 63.17; H, 4.61; N, 2.62.  $[\alpha]_{\text{D}}^{25} = -173.9$  ( $c$  0.21,  $\text{CH}_2\text{Cl}_2$ , 94% ee). Enantiomeric excess of the product was measured by chiral stationary phase HPLC analysis using a Chiracel AD-H column (90:10 hexanes/*i*-PrOH at 1.0 mL/min): major enantiomer:  $t_{\text{R}} = 39.7$  min; minor enantiomer:  $t_{\text{R}} = 46.6$  min.

**(2*S*,3*S*)-3-(4-Cyanophenyl)-1,2-diphenyl-3-(tosylamino)propan-1-one (4g)**

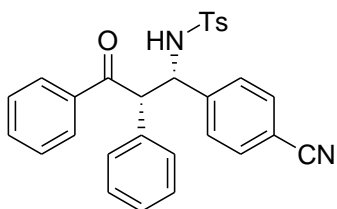

White solid, 93 mg, 97% yield, dr: > 99:1; m.p. 235-237 °C;  $^1\text{H}$  NMR (300 MHz,  $d_6$ -DMSO):  $\delta$  2.26 (s, 3H), 5.04 (t,  $J = 10.2$  Hz, 1H), 5.24 (d,  $J = 10.8$  Hz, 1H), 6.98 (d,  $J = 7.8$  Hz, 2H), 7.13 (d,  $J = 8.1$  Hz, 2H), 7.25-7.51 (m, 12 H), 7.73 (d,  $J = 8.1$  Hz, 2H), 8.32 (d,  $J = 9.9$  Hz, 1H);  $^{13}\text{C}$  NMR (75 MHz,  $d_6$ -DMSO):  $\delta$  20.8, 57.6, 59.3, 109.5, 118.3, 126.0, 127.4, 128.0, 128.5, 128.6, 128.8, 131.6, 133.6, 134.9, 135.1, 137.8, 141.7, 145.6, 196.4.  $\nu_{\text{max}}$ : 3299, 2228, 1658, 1595, 1446, 1325, 1277, 1154, 1079  $\text{cm}^{-1}$ . Analytic calcd. for  $\text{C}_{29}\text{H}_{24}\text{N}_2\text{O}_3\text{S}$ : C, 72.48; H, 5.03; N, 5.83; found: C, 72.34; H, 5.07; N, 5.81.  $[\alpha]_{\text{D}}^{25} = -209.2$  ( $c$  0.25,  $\text{CH}_2\text{Cl}_2$ , 97%



ee). Enantiomeric excess of the product was measured by chiral stationary phase HPLC analysis using a Chiracel AD-H column (80:20 hexanes/*i*-PrOH at 1.0 mL/min): major enantiomer:  $t_R = 18.1$  min; minor enantiomer:  $t_R = 30.8$  min.

**(2*S*,3*S*)-3-(4-Nitrophenyl)-1,2-diphenyl-3-(tosylamino)propan-1-one (4h)**

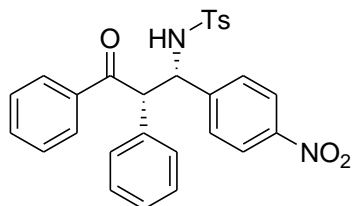

White solid, 93 mg, 93% yield, dr: > 99:1; m.p. 247-249 °C;  $^1\text{H}$  NMR (300 MHz,  $d_6$ -DMSO):  $\delta$  2.21 (s, 3H), 5.11 (t,  $J = 9.9$  Hz, 1H), 5.30 (d,  $J = 11.1$  Hz, 1H), 6.97 (d,  $J = 8.1$  Hz, 2H), 7.15 (d,  $J = 8.1$  Hz, 2H), 7.24-7.54 (m, 9H), 7.76 (d,  $J = 8.1$  Hz, 2H), 7.90 (d,  $J = 8.7$  Hz, 2H), 8.38 (d,  $J = 9.9$  Hz, 1H);  $^{13}\text{C}$  NMR (75 MHz,  $d_6$ -DMSO):  $\delta$  20.7, 54.9, 57.6, 59.1, 122.8, 126.0, 127.5, 128.0, 128.6, 128.8, 129.0, 133.6, 134.9, 135.1, 137.8, 141.8, 146.0, 147.8, 196.4.  $\nu_{\text{max}}$ : 3307, 1660, 1595, 1518, 1447, 1339, 1274, 1153, 1080  $\text{cm}^{-1}$ . Analytic calcd. for  $\text{C}_{28}\text{H}_{24}\text{N}_2\text{O}_5\text{S}$ : C, 67.18; H, 4.83; N, 5.60; found: C, 67.10; H, 4.72; N, 5.59.  $[\alpha]_{\text{D}}^{25} = -187.6$  ( $c$  0.46,  $\text{CH}_2\text{Cl}_2$ , 93% ee). Enantiomeric excess of the product was measured by chiral stationary phase HPLC analysis using a Chiracel AD-H column (70:30 hexanes/*i*-PrOH at 1.0 mL/min): major enantiomer:  $t_R = 11.7$  min; minor enantiomer:  $t_R = 18.8$  min.

**(2*S*,3*S*)-3-(2-Bromophenyl)-1,2-diphenyl-3-(tosylamino)propan-1-one (4i)**

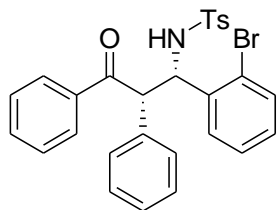

White solid, 103 mg, 96% yield, dr: > 99:1; m.p. 145-146 °C;  $^1\text{H}$  NMR (300 MHz,  $d_6$ -DMSO):  $\delta$  2.23 (s, 3H), 5.34 (d,  $J = 10.5$  Hz, 1H), 5.46 (t,  $J = 10.2$  Hz, 1H), 6.87 (t,  $J = 7.5$  Hz, 1H), 6.96 (d,  $J = 7.5$  Hz, 2H), 7.07 (t,  $J = 7.5$  Hz, 1H), 7.17-7.29 (m, 6H), 7.33-7.58 (m, 6H), 7.71 (d,  $J = 7.2$  Hz, 2H), 8.23 (d,  $J = 9.3$  Hz, 1H);  $^{13}\text{C}$  NMR (75 MHz,  $d_6$ -DMSO):  $\delta$  20.9, 57.6, 57.8, 124.2, 125.9, 127.3, 127.5, 127.8, 128.1, 128.4, 128.5, 128.6, 128.7, 128.9, 132.1, 133.3, 135.4, 135.5, 137.6, 139.7, 141.5, 196.2.  $\nu_{\text{max}}$ : 3325, 1677, 1597, 1446, 1301, 1267, 1157, 1096, 1021  $\text{cm}^{-1}$ . Analytic calcd. for  $\text{C}_{28}\text{H}_{24}\text{BrNO}_3\text{S}$ : C, 62.92; H, 4.53; N, 2.62; found: C, 63.04; H, 4.61; N, 2.56.  $[\alpha]_{\text{D}}^{25} = -181.0$  ( $c$  0.29,  $\text{CH}_2\text{Cl}_2$ , 95% ee). Enantiomeric excess of the product was measured by chiral stationary phase HPLC analysis using a Chiracel OD-H column (90:10 hexanes/*i*-PrOH at 0.8 mL/min): major enantiomer:  $t_R = 21.0$  min; minor enantiomer:  $t_R = 25.8$  min.

**(2*S*,3*S*)-3-(3-Bromophenyl)-1,2-diphenyl-3-(tosylamino)propan-1-one (4j)**

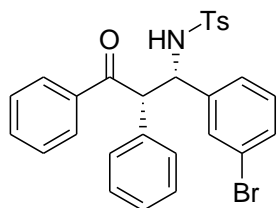

White solid, 96% yield, 103 mg, dr: > 99:1; m.p. 242-244 °C; <sup>1</sup>H NMR (300 MHz, *d*<sub>6</sub>-DMSO): δ 2.25 (s, 3H), 4.94 (d, *J* = 10.8 Hz, 1H), 5.22 (d, *J* = 10.8 Hz, 1H), 7.00 (t, *J* = 7.5 Hz, 3H), 7.13 (d, *J* = 7.5 Hz, 3H), 7.19-7.27 (m, 5H), 7.33-7.51 (m, 5H), 7.74 (d, *J* = 7.5 Hz, 2H), 8.13 (brs, 1H); <sup>13</sup>C NMR (75 MHz, *d*<sub>6</sub>-DMSO): δ 20.9, 57.6, 59.1, 121.1, 125.8, 126.6, 127.3, 128.0, 128.5, 128.7, 128.8, 129.6, 129.8, 130.3, 133.5, 135.2, 135.3, 137.8, 141.7, 142.6, 196.6. *v*<sub>max</sub>: 3303, 1661, 1594, 1447, 1326, 1277, 1153, 1073 cm<sup>-1</sup>. Analytic calcd. for C<sub>28</sub>H<sub>24</sub>BrNO<sub>3</sub>S: C, 62.92; H, 4.53; N, 2.62; found: C, 63.04; H, 4.39; N, 2.64. [α]<sub>D</sub><sup>25</sup> = -126.3 (*c* 0.15, CH<sub>2</sub>Cl<sub>2</sub>, 95% ee). Enantiomeric excess of the product was measured by chiral stationary phase HPLC analysis using a Chiracel AD-H column (80:20 hexanes/*i*-PrOH at 1.0 mL/min): major enantiomer: *t*<sub>R</sub> = 14.9 min; minor enantiomer: *t*<sub>R</sub> = 9.5 min.

**(2*S*,3*S*)-1-(4-Bromophenyl)-2,3-diphenyl-3-(tosylamino)propan-1-one (4k)**

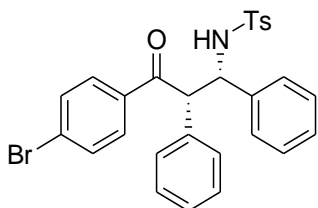

White solid, 102 mg, 95% yield, dr: > 99:1; m.p. 223-224 °C; <sup>1</sup>H NMR (300 MHz, *d*<sub>6</sub>-DMSO): δ 2.23 (s, 3H), 5.00 (t, *J* = 10.8 Hz, 1H), 5.19 (d, *J* = 10.8 Hz, 1H), 6.86-7.07 (m, 6H), 7.11 (d, *J* = 8.1 Hz, 2H), 7.21-7.39 (m, 6H), 7.36-7.73 (m, 4H), 8.16 (d, *J* = 8.1 Hz, 1H); <sup>13</sup>C NMR (75 MHz, *d*<sub>6</sub>-DMSO): δ 20.9, 57.9, 59.5, 125.8, 126.7, 127.3, 127.4, 127.6, 127.7, 128.4, 128.7, 128.9, 129.8, 131.8, 134.4, 135.1, 138.2, 140.3, 141.4, 196.1. *v*<sub>max</sub>: 3344, 1671, 1584, 1493, 1453, 1398, 1329, 1274, 1181, 1069 cm<sup>-1</sup>. Analytic calcd. for C<sub>28</sub>H<sub>24</sub>BrNO<sub>3</sub>S: C, 62.92; H, 4.53; N, 2.62; found: C, 62.84; H, 4.39; N, 2.57. [α]<sub>D</sub><sup>25</sup> = -125.0 (*c* 0.3, CH<sub>2</sub>Cl<sub>2</sub>, 98% ee). Enantiomeric excess of the product was measured by chiral stationary phase HPLC analysis using a Chiracel AD-H column (80:20 hexanes/*i*-PrOH at 1.0 mL/min): major enantiomer: *t*<sub>R</sub> = 26.5 min; minor enantiomer: *t*<sub>R</sub> = 19.3 min.

**(2*S*,3*S*)-1-(4-Chlorophenyl)-2,3-diphenyl-3-(tosylamino)propan-1-one (4l)**

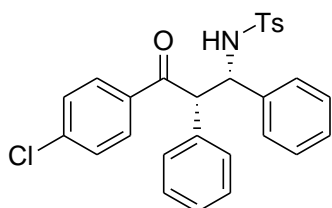

White solid, 93 mg, 95% yield, dr: > 99:1; m.p. 211-212 °C; <sup>1</sup>H NMR (300 MHz, *d*<sub>6</sub>-DMSO): δ 2.22 (s, 3H), 4.99 (t, *J* = 10.8 Hz, 1H), 5.20 (d, *J* = 10.8 Hz, 1H), 6.93-7.04 (m, 5H), 7.10 (d, *J* = 8.1

H<sub>2</sub>, 2H), 7.16-7.21 (m, 5H), 7.23-7.26 (m, 4H), 7.71 (d, *J* = 8.1 Hz, 2H), 8.17 (d, *J* = 8.1 Hz, 1H); <sup>13</sup>C NMR (75 MHz, *d*<sub>6</sub>-DMSO): δ 20.9, 58.0, 59.5, 125.8, 126.7, 127.3, 127.4, 127.6, 128.4, 128.7, 128.9, 129.7, 134.1, 135.2, 138.2, 138.4, 140.4, 141.4, 195.9. *v*<sub>max</sub>: 3348, 1673, 1587, 1492, 1400, 1330, 1275, 1155, 1089 cm<sup>-1</sup>. Analytic calcd. for C<sub>28</sub>H<sub>24</sub>ClNO<sub>3</sub>S: C, 68.63; H, 4.94; N, 2.86; found: C, 68.72; H, 4.83; N, 2.87. [α]<sub>D</sub><sup>25</sup> = -130.0 (*c* 0.29, CH<sub>2</sub>Cl<sub>2</sub>, 96% ee). Enantiomeric excess of the product was measured by chiral stationary phase HPLC analysis using a Chiracel AD-H column (80:20 hexanes/*i*-PrOH at 1.0 mL/min): major enantiomer: *t*<sub>R</sub> = 23.7 min; minor enantiomer: *t*<sub>R</sub> = 17.8 min.

**(2*S*,3*S*)-1-(4-Methoxyphenyl)-2,3-diphenyl-3-(tosylamino)propan-1-one (4m)**

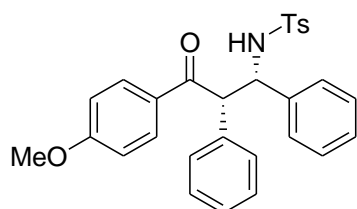

White solid, 73 mg, 75% yield, dr: > 99:1; m.p. 242-244 °C; <sup>1</sup>H NMR (300 MHz, *d*<sub>6</sub>-DMSO): δ 2.24 (s, 3H), 3.73 (s, 3H), 5.02 (t, *J* = 6.0 Hz, 1H), 5.19 (d, *J* = 6.6 Hz, 1H), 6.88 (d, *J* = 5.4 Hz, 2H), 6.96-7.04 (m, 5H), 7.12 (d, *J* = 4.8 Hz, 2H), 7.19-7.25 (m, 5H), 7.41 (d, *J* = 4.2 Hz, 2H), 7.72 (d, *J* = 5.4 Hz, 2H), 8.14 (d, *J* = 5.7 Hz, 1H); <sup>13</sup>C NMR (75 MHz, *d*<sub>6</sub>-DMSO): δ 21.5, 56.2, 58.2, 60.3, 114.8, 126.7, 127.5, 127.9, 128.3, 128.4, 129.1, 129.2, 129.5, 129.7, 131.2, 136.8, 139.2, 141.5, 142.2, 164.0, 196.0. *v*<sub>max</sub>: 3329, 1659, 1599, 1326, 1264, 1154, 1090, 1070 cm<sup>-1</sup>. Analytic calcd. for C<sub>29</sub>H<sub>27</sub>ClNO<sub>4</sub>S: C, 71.73; H, 5.60; N, 2.88; found: C, 71.83; H, 5.73; N, 2.87. [α]<sub>D</sub><sup>25</sup> = -112.5 (*c* 0.21, CH<sub>2</sub>Cl<sub>2</sub>, 96% ee). Enantiomeric excess of the product was measured by chiral stationary phase HPLC analysis using a Chiracel AD-H column (80:20 hexanes/*i*-PrOH at 1.0 mL/min): major enantiomer: *t*<sub>R</sub> = 35.1 min; minor enantiomer: *t*<sub>R</sub> = 26.6 min.

**(1*S*,2*S*)-1,2-diphenyl-1-(tosylamino)pentan-3-one (4n)**

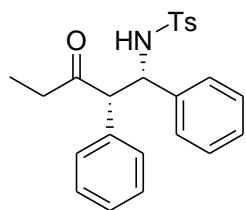

White solid, 61 mg, 75% yield, dr: > 99:1; m.p. 195-196 °C; <sup>1</sup>H NMR (300 MHz, *d*<sub>6</sub>-DMSO): δ 0.67 (t, *J* = 7.2 Hz, 3H), 1.85 (dd, *J* = 7.2, 18.0 Hz, 1H), 2.22 (dd, *J* = 7.2, 18.0 Hz, 1H), 2.39 (s, 3H), 4.00 (d, *J* = 10.2 Hz, 1H), 4.73 (d, *J* = 4.8 Hz, 1H), 4.82 (dd, *J* = 4.8, 10.2 Hz, 1H), 7.05-7.21 (m, 9H), 7.22-7.29 (m, 5H); <sup>13</sup>C NMR (75 MHz, *d*<sub>6</sub>-DMSO): δ 7.3, 21.6, 36.8, 59.4, 64.6, 127.1, 127.5, 127.8, 128.1, 128.3, 128.8, 129.1, 129.2, 133.7, 136.2, 138.9, 142.9, 207.6. *v*<sub>max</sub>: 3291, 1704, 1599, 1493, 1447, 1332, 1156, 1090, 1071 cm<sup>-1</sup>. Analytic calcd. for

C<sub>24</sub>H<sub>25</sub>NO<sub>3</sub>S: C, 70.73; H, 6.18; N, 3.44; found: C, 70.52; H, 5.98; N, 3.41. [ $\alpha$ ]<sub>D</sub><sup>25</sup> = -162.4 (*c* 0.32, CH<sub>2</sub>Cl<sub>2</sub>, >99% ee). Enantiomeric excess of the product was measured by chiral stationary phase HPLC analysis using a Chiracel AD-H column (80:20 hexanes/*i*-PrOH at 1.0 mL/min): major enantiomer: *t*<sub>R</sub> = 7.5 min; minor enantiomer: *t*<sub>R</sub> = 9.2 min.

**(3*S*,4*S*)-1,3,4-Triphenyl-4-(tosylamino)butan-2-one (4o)**

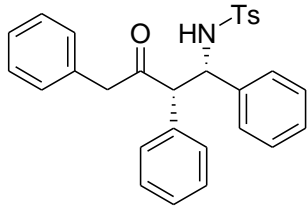

White solid, 89 mg, 95% yield, dr: > 99:1; m.p. 236-237 °C; <sup>1</sup>H NMR (300 MHz, *d*<sub>6</sub>-DMSO):  $\delta$  2.22 (s, 3H), 3.19 (d, *J* = 16.8 Hz, 1H), 3.46 (d, *J* = 16.8 Hz, 1H), 4.37 (d, *J* = 11.1 Hz, 1H), 4.84 (t, *J* = 10.5 Hz, 1H), 6.49 (d, *J* = 6.0 Hz, 2H), 6.93 (d, *J* = 7.8 Hz, 2H), 7.01-7.21 (m, 9H), 7.23-7.41 (m, 5H), 8.12 (d, *J* = 9.6 Hz, 1H); <sup>13</sup>C NMR (75 MHz, *d*<sub>6</sub>-DMSO):  $\delta$  20.9, 49.3, 58.8, 62.8, 125.8, 126.3, 126.8, 127.3, 127.4, 127.6, 127.9, 128.3, 128.6, 128.9, 129.1, 133.1, 134.9, 138.2, 139.7, 141.3, 204.9.  $\nu_{\text{max}}$ : 3297, 1705, 1599, 1493, 1453, 1327, 1154, 1064 cm<sup>-1</sup>. Analytic calcd. for C<sub>29</sub>H<sub>27</sub>NO<sub>3</sub>S: C, 74.17; H, 5.80; N, 2.98; found: C, 74.00; H, 5.68; N, 3.01. [ $\alpha$ ]<sub>D</sub><sup>25</sup> = -182.5 (*c* 0.32, CH<sub>2</sub>Cl<sub>2</sub>, 96% ee). Enantiomeric excess of the product was measured by chiral stationary phase HPLC analysis using a Chiracel IB column (95:5 hexanes/*i*-PrOH at 1.0 mL/min): major enantiomer: *t*<sub>R</sub> = 30.8 min; minor enantiomer: *t*<sub>R</sub> = 39.3 min.

**(2*S*,3*R*)-2-*tert*-Butoxycarbonyloxy-1,3-diphenyl-3-(tosylamino)propan-1-one (4p)**

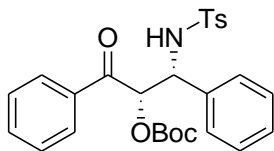

White solid, 95 mg, 96% yield, dr: 93:7; m.p. 144-145 °C; <sup>1</sup>H NMR (300 MHz, CDCl<sub>3</sub>):  $\delta$  1.42 (s, 9H), 2.34 (s, 3H), 5.00 (dd, *J* = 4.2, 8.4 Hz, 1H), 5.83 (d, *J* = 8.4 Hz, 1H), 5.99 (d, *J* = 3.9 Hz, 1H), 6.96 (d, *J* = 7.2 Hz, 2H), 7.03-7.12 (m, 5H), 7.38 (t, *J* = 7.2 Hz, 2H), 7.52 (d, *J* = 7.8 Hz, 1H), 7.58 (d, *J* = 8.1 Hz, 2H), 7.67 (d, *J* = 8.7 Hz, 2H); <sup>13</sup>C NMR (75 MHz, CDCl<sub>3</sub>):  $\delta$  21.5, 27.6, 57.9, 78.4, 83.5, 126.9, 127.4, 128.1, 128.2, 129.3, 133.6, 134.6, 134.8, 137.0, 143.1, 152.1, 193.7.  $\nu_{\text{max}}$ : 3273, 1740, 1700, 1450, 1367, 1331, 1282, 1242, 1158, 1091 cm<sup>-1</sup>. Analytic calcd. for C<sub>27</sub>H<sub>29</sub>NO<sub>6</sub>S: C, 65.44; H, 5.90; N, 2.83; found: C, 65.28; H, 5.80; N, 2.83. [ $\alpha$ ]<sub>D</sub><sup>25</sup> = -46.5 (*c* 0.32, CH<sub>2</sub>Cl<sub>2</sub>, >99% ee). Enantiomeric excess of the product was measured by chiral stationary phase HPLC analysis using a Chiracel ID column (80:20 hexanes/*i*-PrOH at 1.0 mL/min): major enantiomer: *t*<sub>R</sub> = 38.0 min; minor enantiomer: *t*<sub>R</sub> = 32.7 min.

**(2*S*,3*R*)-3-(4-Bromophenyl)-2-*tert*-butoxycarbonyloxy-1-phenyl-3-(tosylamino)propan-1-one (4q)**

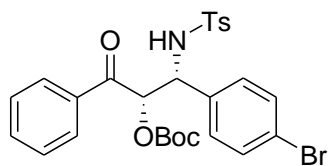

White solid, 110 mg, 96% yield, dr: 92:8; m.p. 166-167 °C; <sup>1</sup>H NMR (300 MHz, *d*<sub>6</sub>-DMSO): δ 1.27 (s, 9H), 2.31 (s, 3H), 4.66 (dd, *J* = 6.3, 8.4 Hz, 1H), 5.89 (d, *J* = 6.0 Hz, 1H), 6.94 (d, *J* = 8.4 Hz, 2H), 7.15 (d, *J* = 8.1 Hz, 2H), 7.29 (d, *J* = 8.4 Hz, 2H), 7.42 (d, *J* = 8.4 Hz, 2H), 7.54 (t, *J* = 7.8 Hz, 2H), 7.70 (t, *J* = 7.5 Hz, 1H), 7.77 (d, *J* = 7.2 Hz, 2H), 8.69 (d, *J* = 8.7 Hz, 1H); <sup>13</sup>C NMR (75 MHz, *d*<sub>6</sub>-DMSO): δ 21.0, 27.1, 57.4, 77.3, 82.9, 121.0, 126.4, 128.1, 128.9, 129.1, 130.0, 130.6, 134.0, 134.5, 134.9, 137.4, 142.5, 151.4, 193.6.  $\nu_{\text{max}}$ : 3300, 1735, 1674, 1596, 1444, 1396, 1284, 1250, 1152, 1071 cm<sup>-1</sup>. Analytic calcd. for C<sub>27</sub>H<sub>28</sub>BrNO<sub>6</sub>S: C, 56.45; H, 4.91; N, 2.44; found: C, 56.50; H, 5.01; N, 2.46.  $[\alpha]_{\text{D}}^{25}$  = -68.0 (*c* 0.25, CH<sub>2</sub>Cl<sub>2</sub>, >99% ee). Enantiomeric excess of the product was measured by chiral stationary phase HPLC analysis using a Chiracel ID column (80:20 hexanes/*i*-PrOH at 1.0 mL/min): major enantiomer: *t*<sub>R</sub> = 26.2 min; minor enantiomer: *t*<sub>R</sub> = 24.2 min.

**(2*S*,3*S*)-2,3-Diphenyl-3-(tosylamino)propan-1-ol (13)**

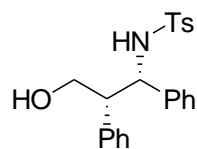

Colorless liquid, 94 mg, 87% yield. dr: 97:3; <sup>1</sup>H NMR (300 MHz, CDCl<sub>3</sub>): δ 2.15 (t, *J* = 6.0 Hz, 1H), 2.32 (s, 3H), 3.05-3.11 (m, 1H), 3.64-3.72 (m, 1H), 3.91-4.00 (m, 1H), 4.77 (dd, *J*<sub>1</sub> = 6.0, *J*<sub>2</sub> = 7.8 Hz, 1H), 5.12 (d, *J* = 7.8 Hz, 1H), 6.78 (dd, *J* = 1.8, 8.1 Hz, 2H), 6.91 (dd, *J* = 2.1, 5.7 Hz, 2H), 7.02-7.14 (m, 4H), 7.13-7.26 (m, 3H), 7.40 (d, *J* = 8.4 Hz, 2H); <sup>13</sup>C NMR (75 MHz, CDCl<sub>3</sub>): δ 21.5, 54.0, 58.2, 63.0, 126.9, 127.2, 127.6, 127.9, 128.6, 128.8, 129.1, 136.6, 138.5, 142.9.  $\nu_{\text{max}}$ : 3552, 3320, 2939, 1597, 1428, 1316, 1147, 1086, 1066 cm<sup>-1</sup>. HRMS calcd. for C<sub>22</sub>H<sub>23</sub>NO<sub>3</sub>S: 381.1399; found: 381.1391.  $[\alpha]_{\text{D}}^{25}$  = -26.3 (*c* 0.25, CH<sub>2</sub>Cl<sub>2</sub>, 96% ee). Enantiomeric excess of the product was determined by chiral stationary phase HPLC analysis using a ChiraCel AD-H (80:20 hexanes/*i*-PrOH at 1.0 mL/min); major enantiomer: *t*<sub>R</sub> = 10.57 min, minor enantiomer: *t*<sub>R</sub> = 14.19 min.

**(2*R*,3*S*)-2-*tert*-Butoxycarbonyloxy-1-(4-methoxyphenyl)-3-phenyl-3-(tosylamino)propan-1-one (4r)**

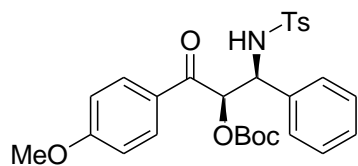

White solid, 101 mg, 96% yield, dr: 90:10; m.p. 131-132 °C;  $^1\text{H}$  NMR (300 MHz,  $\text{CDCl}_3$ ):  $\delta$  1.43 (s, 9H), 2.34 (s, 3H), 3.85 (s, 3H), 4.99 (dd,  $J = 4.2, 8.4$  Hz, 1H), 5.89 (d,  $J = 8.1$  Hz, 1H), 5.95 (d,  $J = 3.9$  Hz, 1H), 6.84 (d,  $J = 8.7$  Hz, 2H), 6.84 (d,  $J = 9.3$  Hz, 2H), 6.99-7.12 (m, 5H), 7.58 (d,  $J = 8.1$  Hz, 2H), 7.68 (d,  $J = 8.7$  Hz, 2H);  $^{13}\text{C}$  NMR (75 MHz,  $\text{CDCl}_3$ ):  $\delta$  21.5, 27.6, 55.5, 58.1, 77.7, 83.4, 113.9, 126.9, 127.4, 127.7, 128.0, 129.2, 130.7, 134.8, 137.1, 143.0, 152.1, 163.8, 191.8.  $\nu_{\text{max}}$ : 3256, 1740, 1692, 1600, 1454, 1246, 1157, 1089  $\text{cm}^{-1}$ . Analytic calcd. for  $\text{C}_{28}\text{H}_{31}\text{NO}_7\text{S}$ : C, 63.98; H, 5.94; N, 2.66; found: C, 63.82; H, 5.98; N, 2.68.  $[\alpha]_{\text{D}}^{25} = -68.0$  ( $c$  0.25,  $\text{CH}_2\text{Cl}_2$ , >99% ee). Enantiomeric excess of the product was measured by chiral stationary phase HPLC analysis using a Chiracel IB column (85:15 hexanes/*i*-PrOH at 1.0 mL/min): major enantiomer:  $t_{\text{R}} = 14.5$  min; minor enantiomer:  $t_{\text{R}} = 11.9$  min.

**(2R,3S)-4-Methoxyphenyl 2-(tert-butoxycarbonyloxy)-3-phenyl-3-(tosylamino)propanoate (14)**

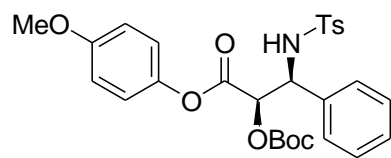

White solid, 140 mg, 86% yield; m.p. 95-96 °C;  $^1\text{H}$  NMR (300 MHz,  $\text{CDCl}_3$ ):  $\delta$  1.47 (s, 9H), 2.33 (s, 3H), 3.73 (s, 3H), 5.07 (dd,  $J = 4.1, 8.2$  Hz, 1H), 5.35 (d,  $J = 4.5$  Hz, 1H), 5.91 (d,  $J = 9.0$  Hz, 1H), 6.61 (d,  $J = 8.7$  Hz, 2H), 6.76 (d,  $J = 8.7$  Hz, 2H), 7.09 (d,  $J = 7.8$  Hz, 2H), 7.16-7.22 (m, 5H), 7.57 (d,  $J = 8.1$  Hz, 2H);  $^{13}\text{C}$  NMR (75 MHz,  $\text{CDCl}_3$ ):  $\delta$  21.5, 27.6, 55.5, 57.4, 76.4, 83.8, 114.2, 121.6, 126.8, 127.8, 128.3, 129.3, 133.3, 134.8, 136.9, 143.0, 143.1, 152.0, 157.2, 165.8.  $\nu_{\text{max}}$ : 2932, 1746, 1503, 1457, 1280, 1245, 1156, 1113  $\text{cm}^{-1}$ . Analytic calcd. for  $\text{C}_{28}\text{H}_{31}\text{NO}_8\text{S}$ : C, 62.09; H, 5.77; N, 2.59; found: C, 62.17; H, 5.68; N, 2.70.  $[\alpha]_{\text{D}}^{25} = +49.2$  ( $c$  0.25,  $\text{CH}_2\text{Cl}_2$ ).

**(2R,3S)-4-Methoxyphenyl 2-(tert-butoxycarbonyloxy)-3-phenyl-3-(N-tosylbenzamido)propanoate (15)**

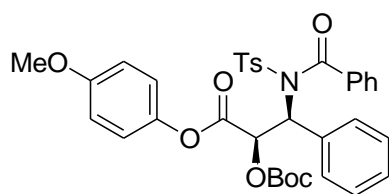

Colorless oil,  $^1\text{H}$  NMR (300 MHz,  $\text{CDCl}_3$ ):  $\delta$  1.46 (s, 9H), 2.36 (s, 3H), 3.79 (s, 3H), 6.07 (d,  $J = 9.0$  Hz, 1H), 6.32 (d,  $J = 9.3$  Hz, 1H), 6.87 (d,  $J = 9.0$  Hz, 2H), 7.03-7.10 (m, 4H), 7.16-7.20 (m, 6H), 7.36-7.46 (m, 6H);  $^{13}\text{C}$  NMR (75 MHz,  $\text{CDCl}_3$ ):  $\delta$  21.6, 27.6,

55.5, 60.7, 73.5, 83.7, 114.3, 122.1, 127.6, 128.1, 128.3, 128.4, 128.5, 129.1, 129.3, 131.0, 134.6, 125.2, 135.6, 143.7, 144.6, 151.9, 157.2, 167.0, 171.7.

**(2*R*,3*S*)-4-Methoxyphenyl 3-(benzamido)-2-(*tert*-butoxycarbonyloxy)-3-phenylpropanoate**  
**(16)**

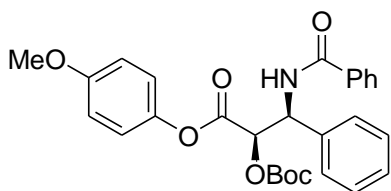

White solid, 87 mg, 92% yield, m.p. 105-106 °C; <sup>1</sup>H NMR (300 MHz, CDCl<sub>3</sub>): δ 1.51 (s, 9H), 3.76 (s, 3H), 5.58 (d, *J* = 4.8 Hz, 1H), 5.94 (dd, *J* = 4.1, 8.2 Hz, 1H), 6.68 (d, *J* = 9.3 Hz, 2H), 6.80 (d, *J* = 9.0 Hz, 2H), 7.08 (d, *J* = 8.1 Hz, 1H), 7.38-7.54 (m, 8H), 7.81 (dd, *J* = 1.5, 8.4 Hz, 2H); <sup>13</sup>C NMR (75 MHz, CDCl<sub>3</sub>): δ 27.7, 53.8, 55.6, 75.7, 84.0, 114.3, 121.7, 127.0, 127.7, 128.5, 128.8, 131.7, 133.7, 136.1, 143.1, 152.4, 157.3, 166.5, 167.0.  $\nu_{\text{max}}$ : 2980, 1741, 1644, 1528, 1503, 1288, 1241, 1151, 1102, 1028 cm<sup>-1</sup>. Analytic calcd. for C<sub>28</sub>H<sub>29</sub>NO<sub>7</sub>: C, 68.42; H, 5.95; N, 2.85; found: C, 68.20; H, 6.05; N, 2.81.  $[\alpha]_{\text{D}}^{25} = +31.6$  (*c* 0.4, CH<sub>2</sub>Cl<sub>2</sub>).

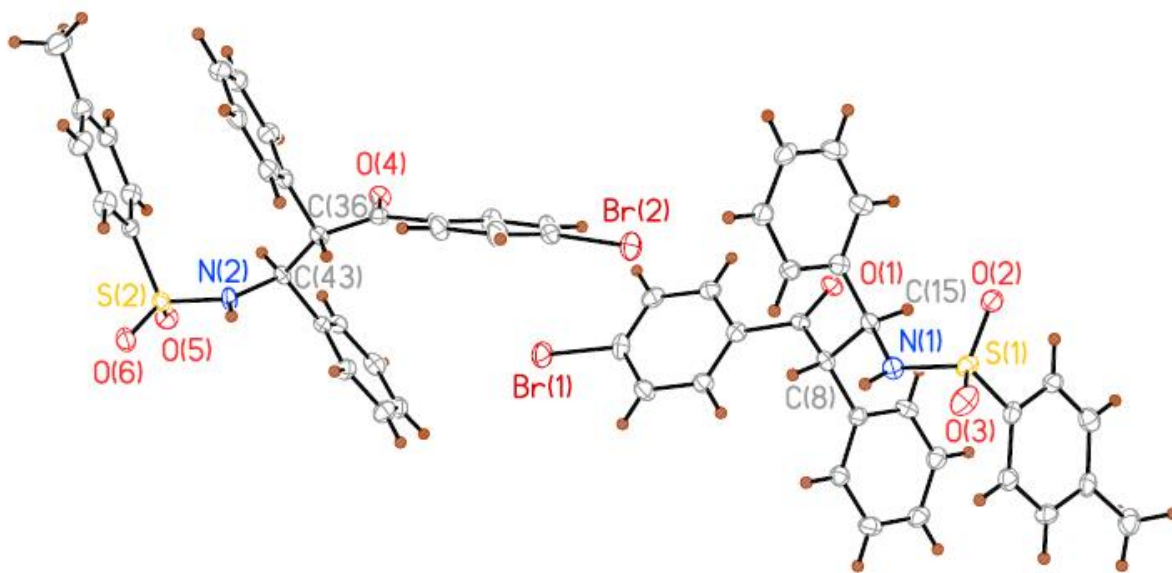

**Figure S-1. ORTEP Drawing of Compound 4k**

**Note: There are two unique molecules in the asymmetric unit. The CSD deposition No. for this compound is 871462.**



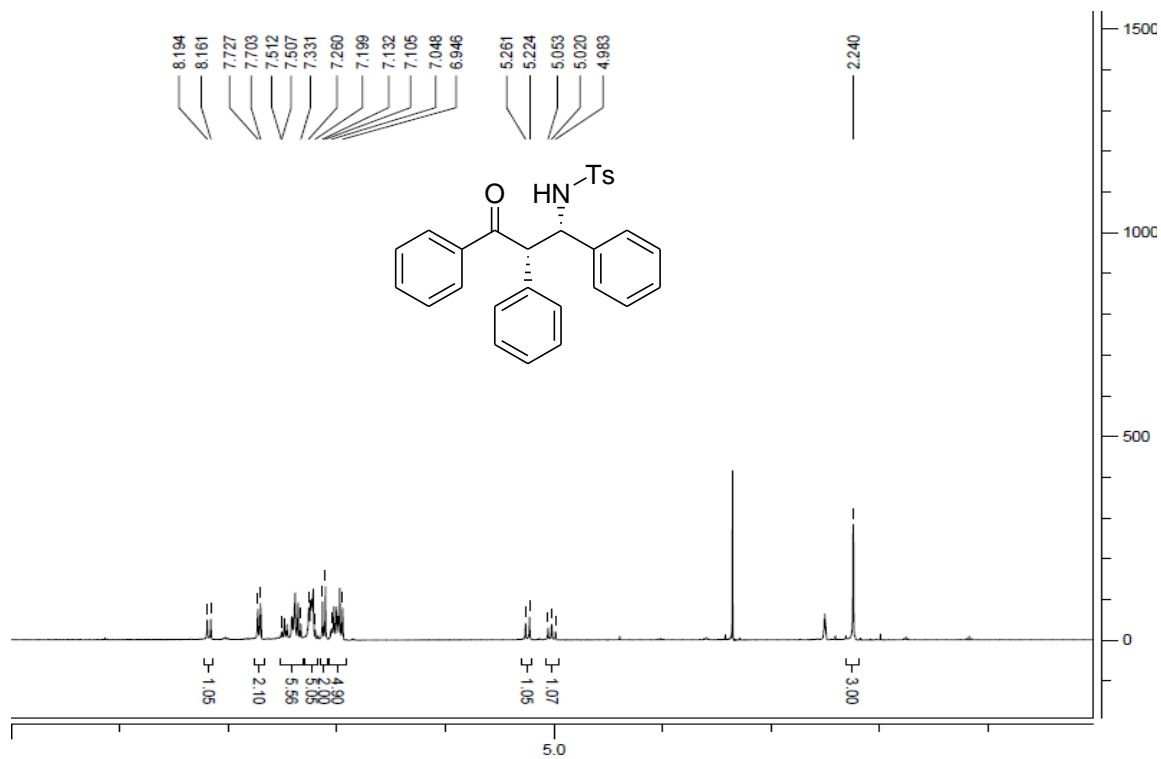

**<sup>1</sup>H NMR of 4a**

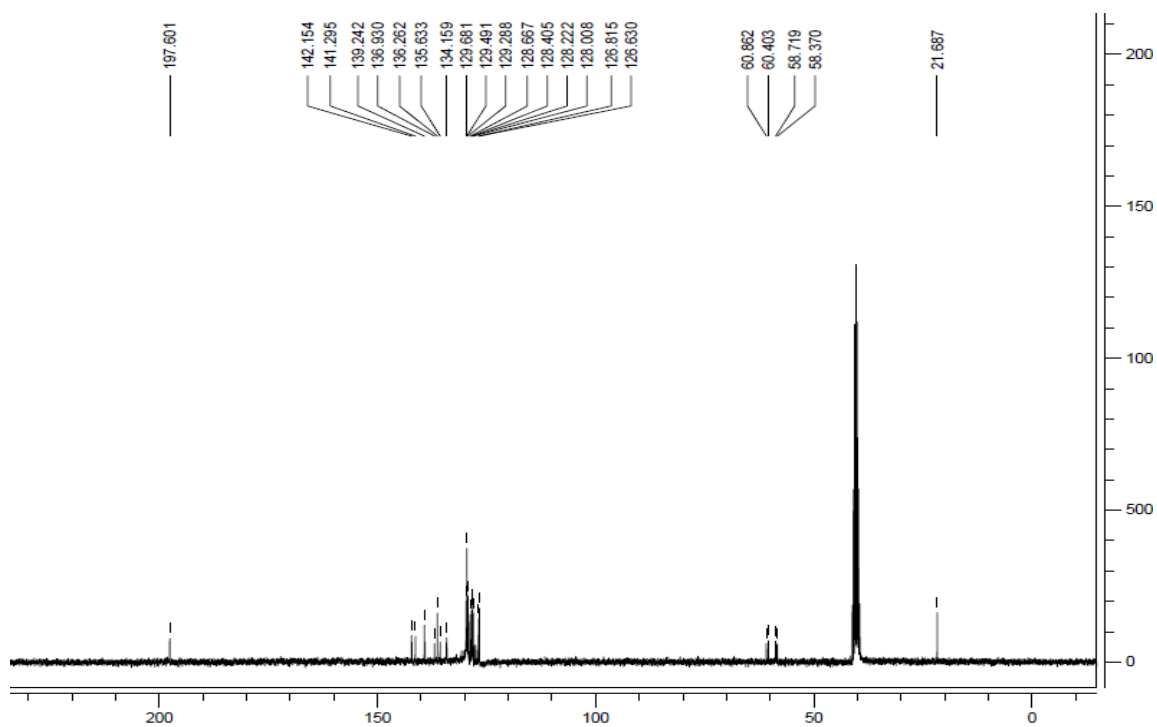

**<sup>13</sup>C NMR of 4a**

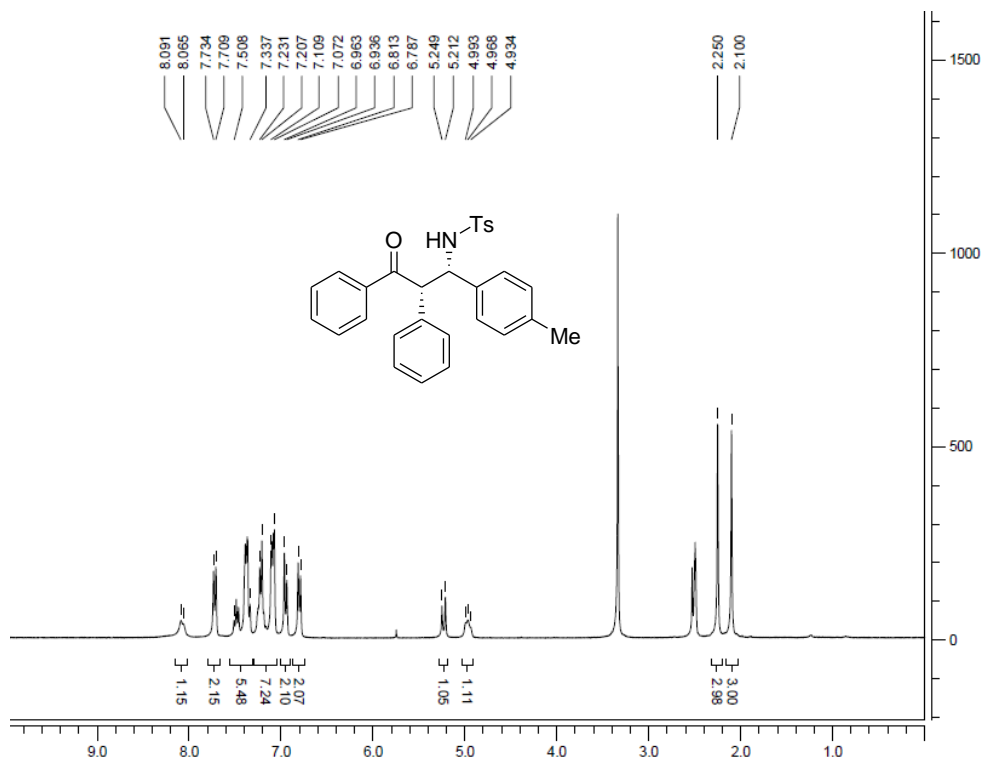

$^1\text{H NMR}$  of **4b**

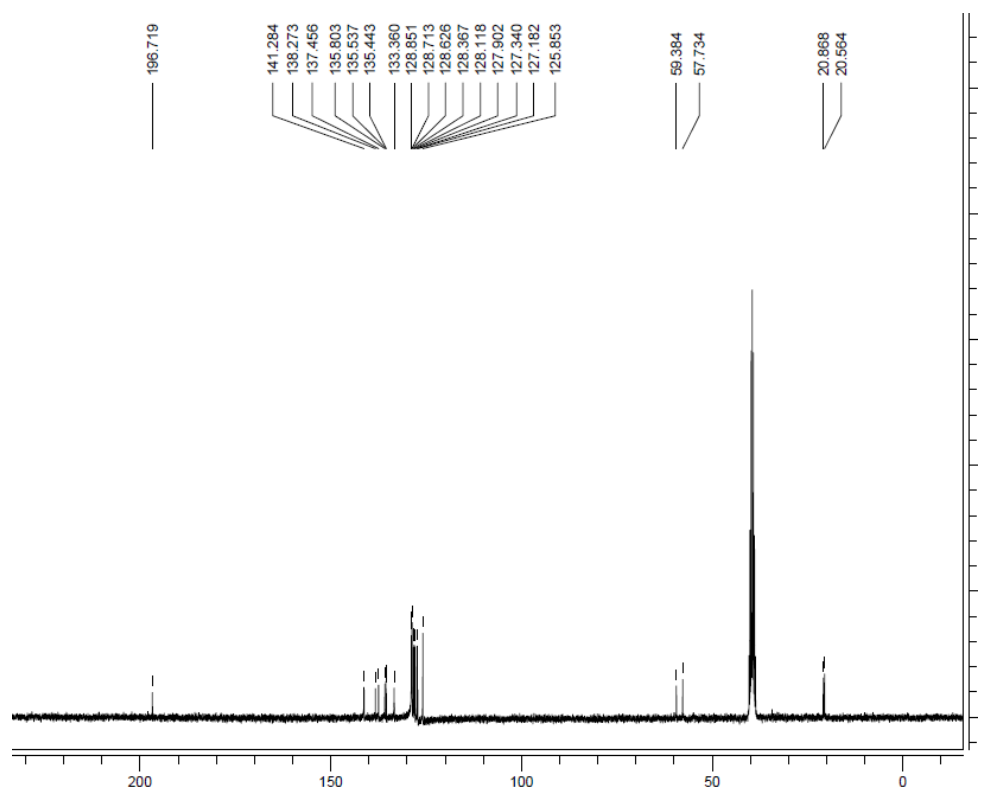

$^{13}\text{C NMR}$  of **4b**

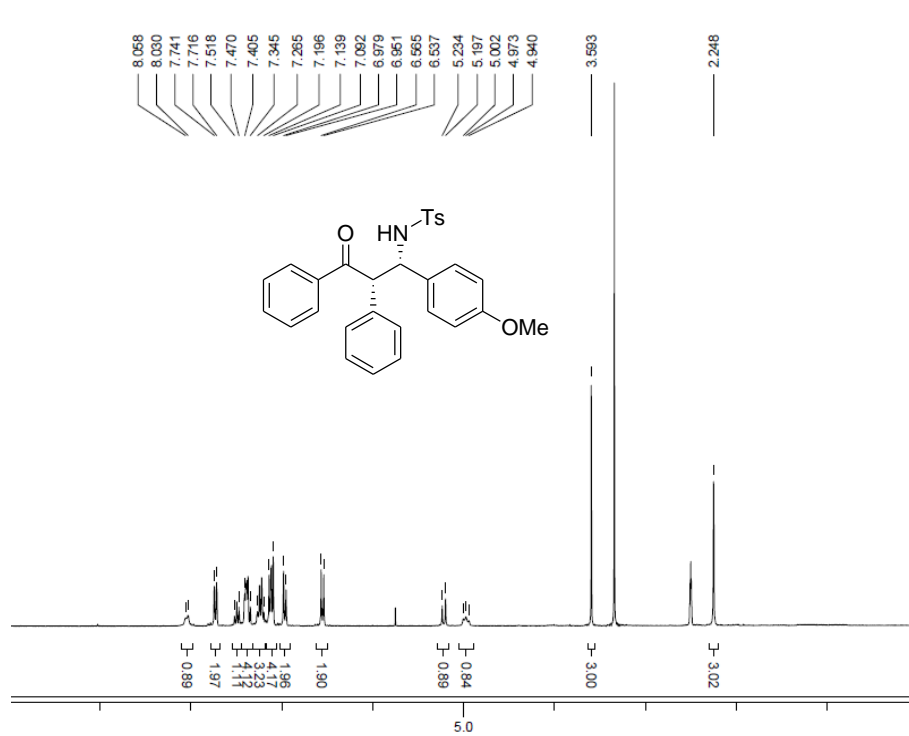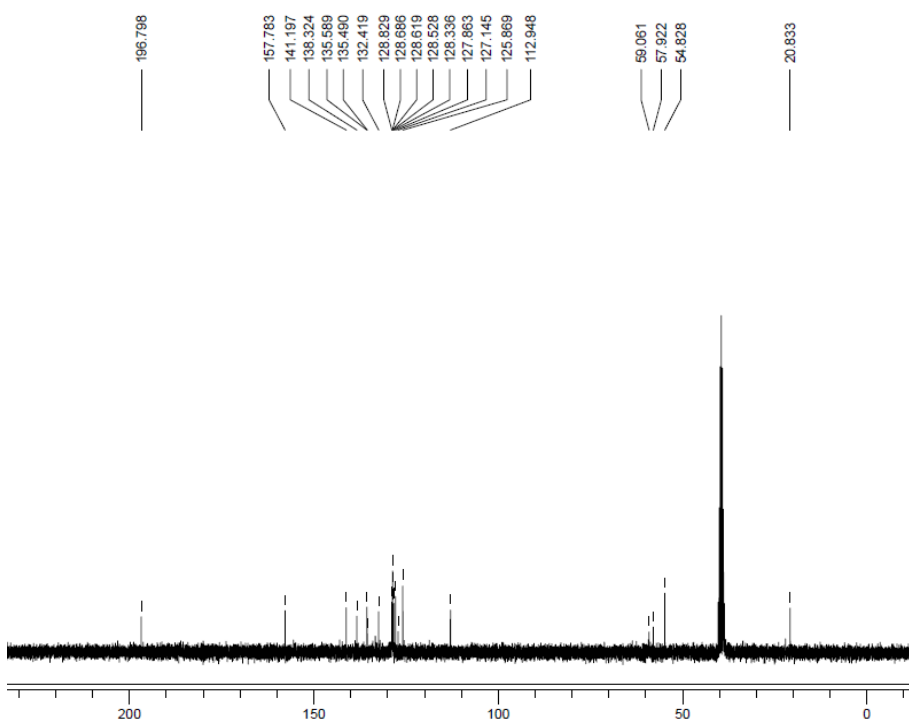

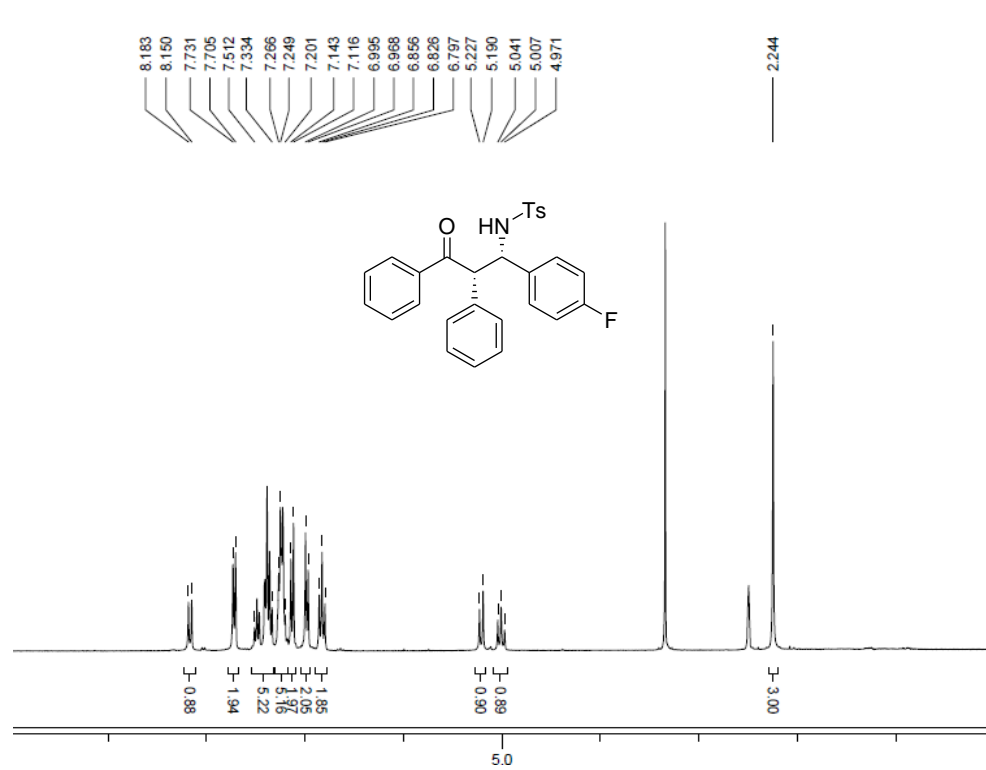

**<sup>1</sup>H NMR of 4d**

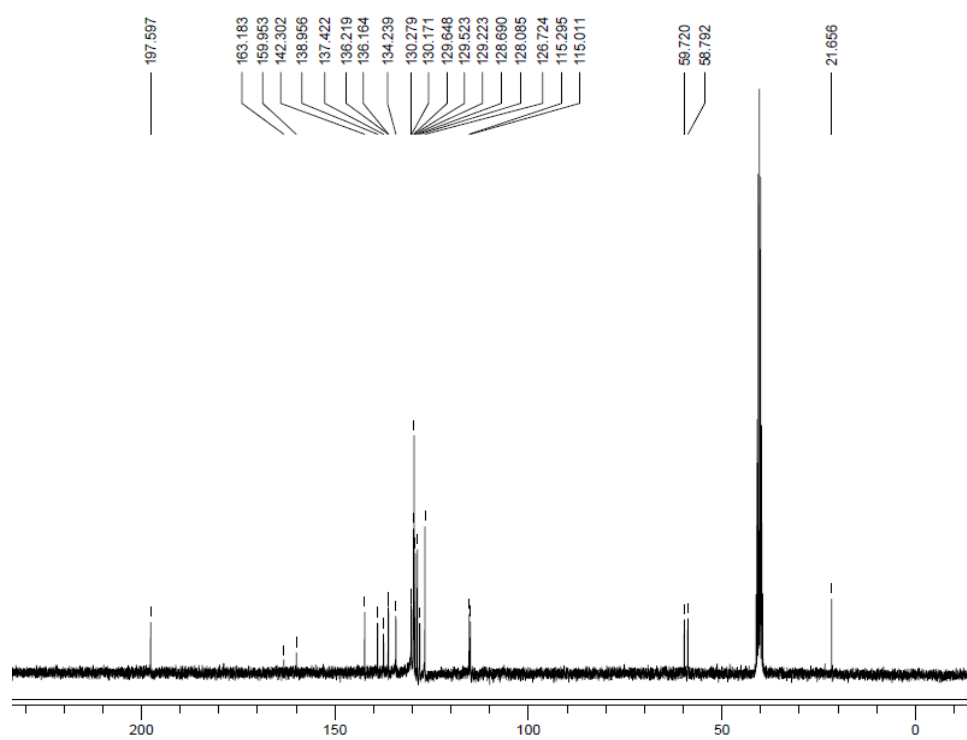

**<sup>13</sup>C NMR of 4d**

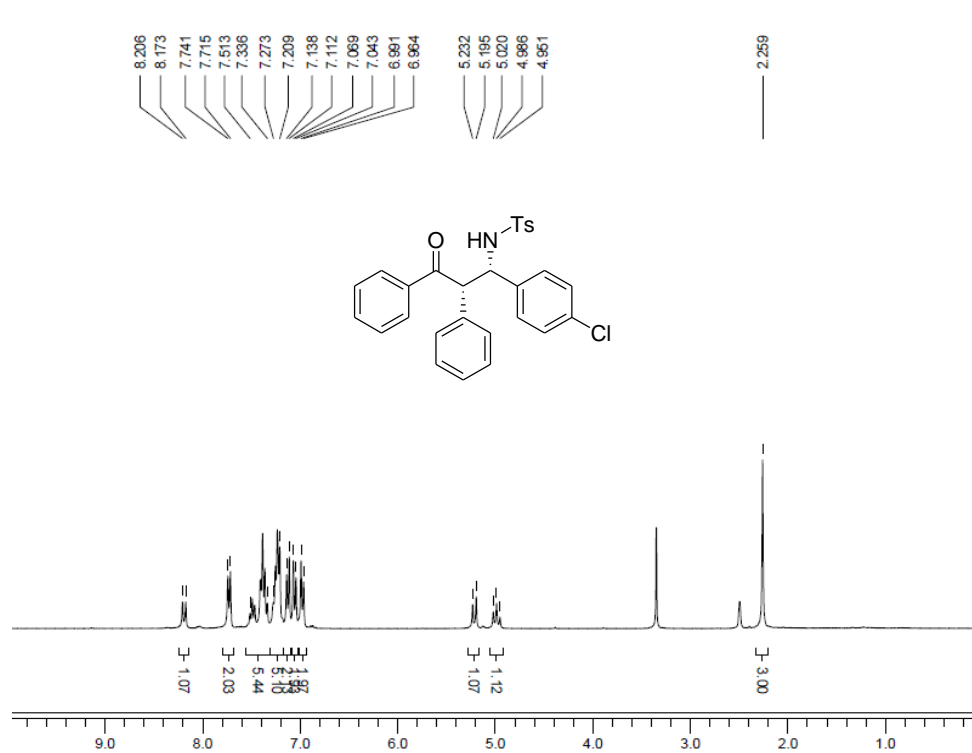

<sup>1</sup>H NMR of **4e**

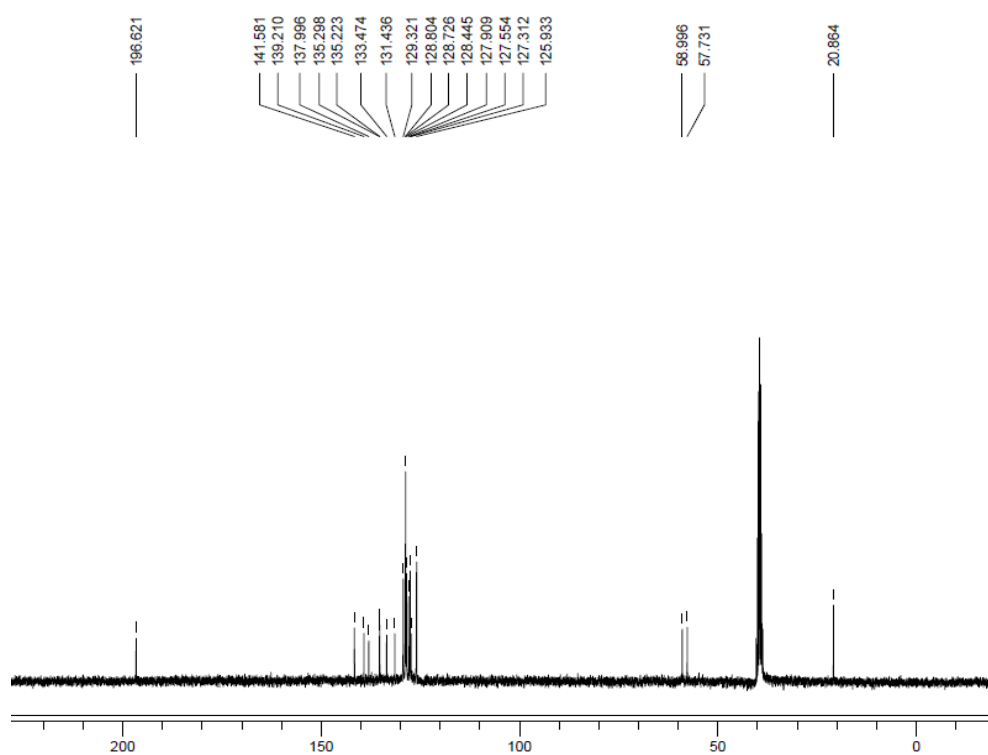

<sup>13</sup>C NMR of **4e**

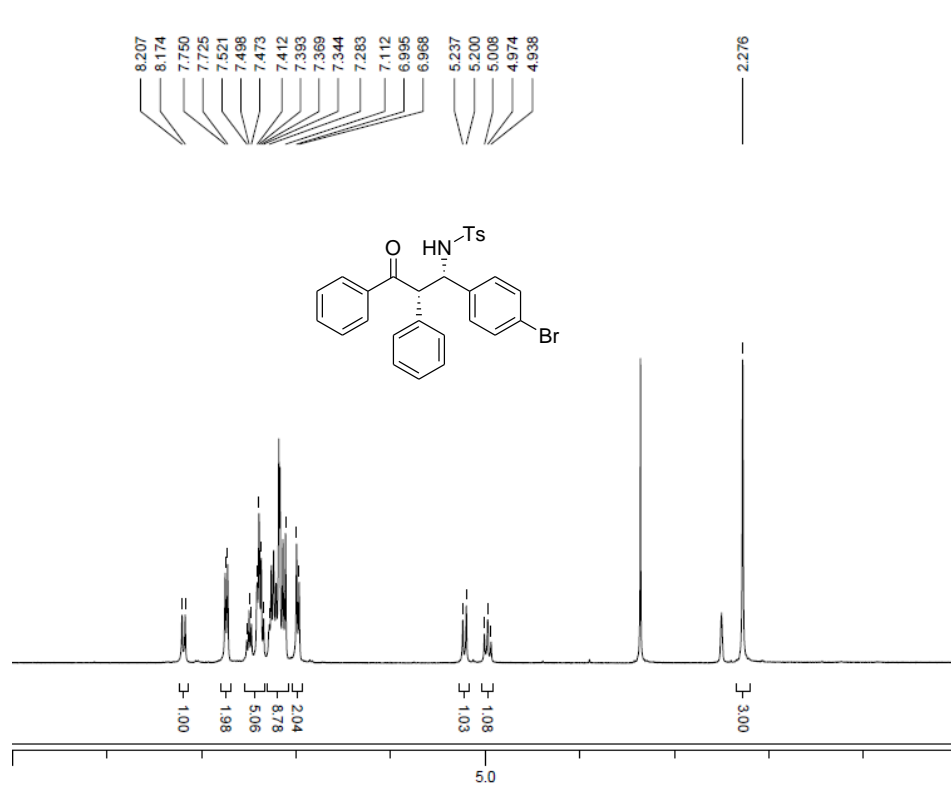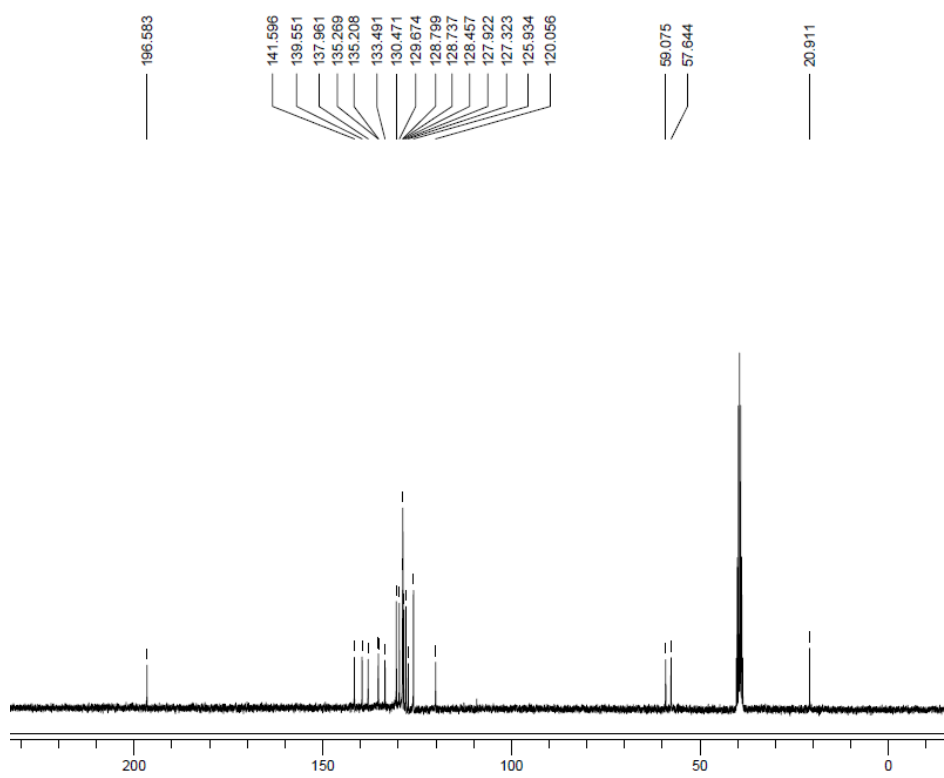

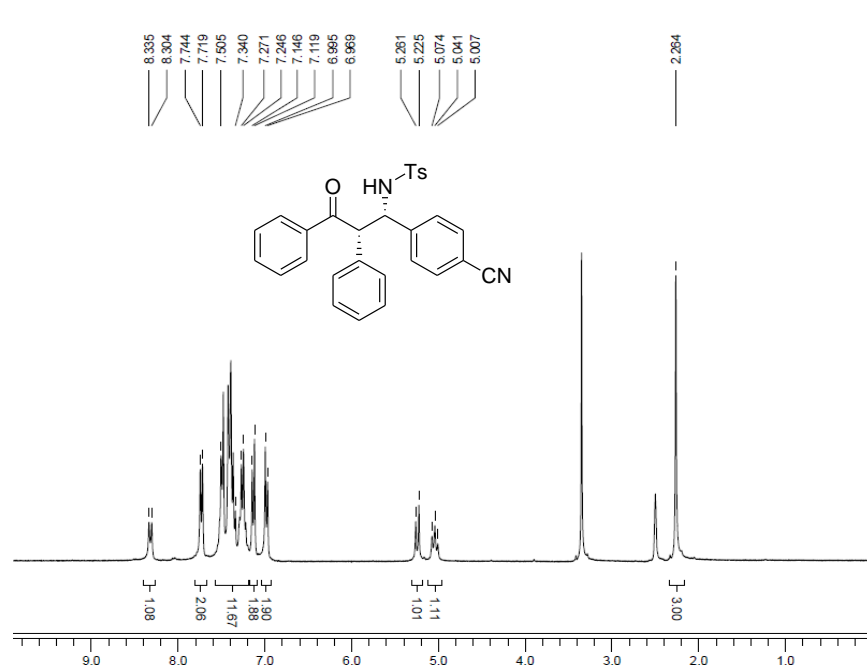

<sup>1</sup>H NMR of **4g**

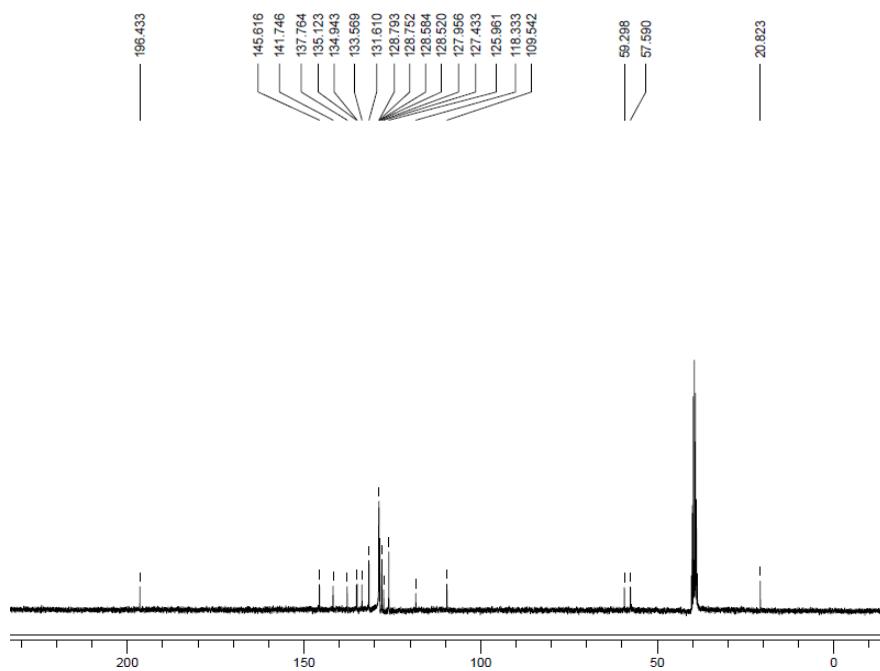

<sup>13</sup>C NMR of **4g**

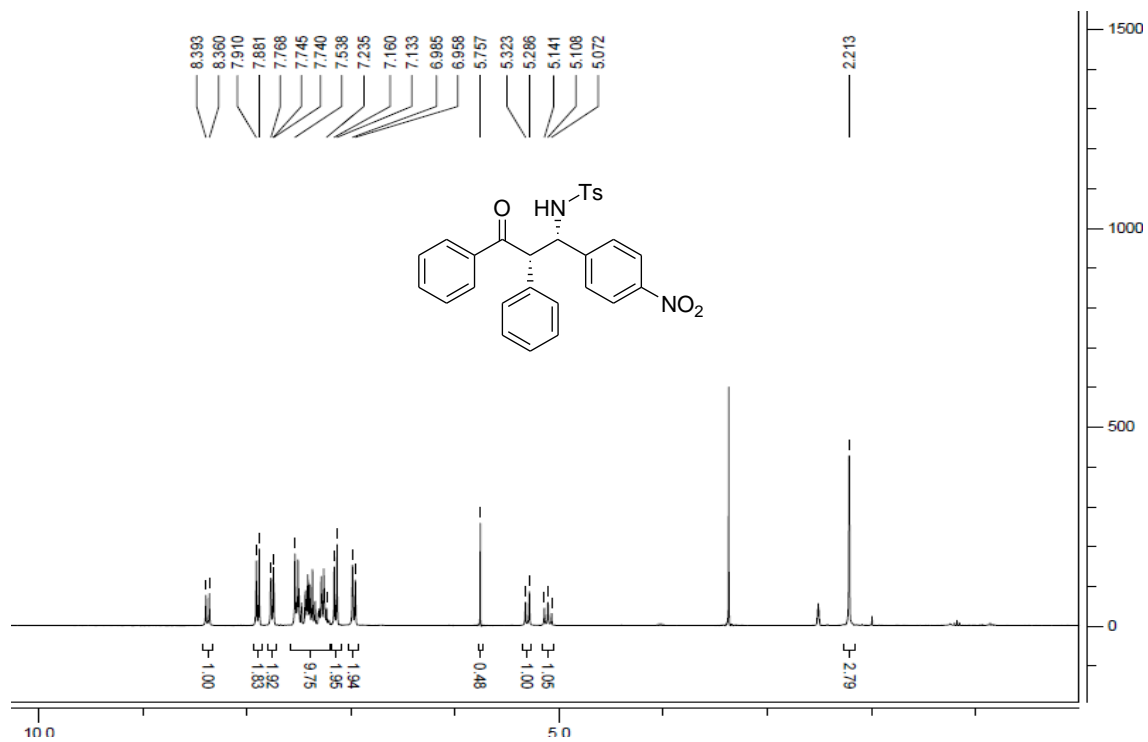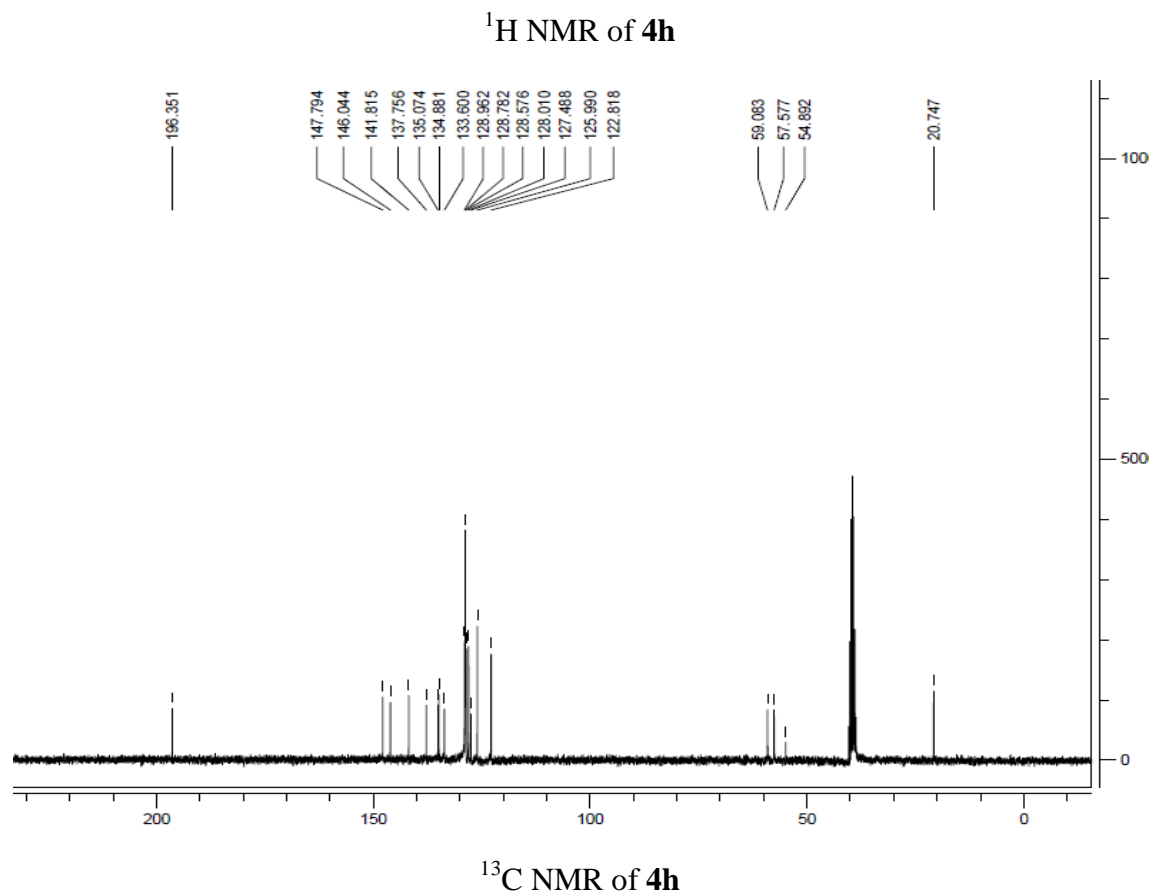



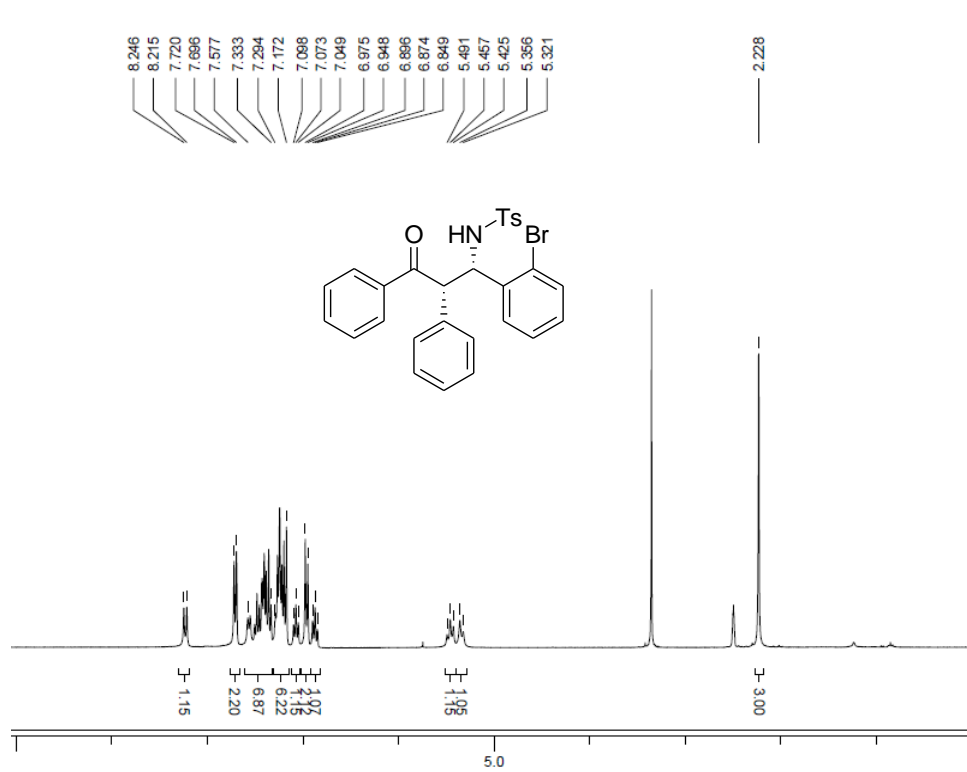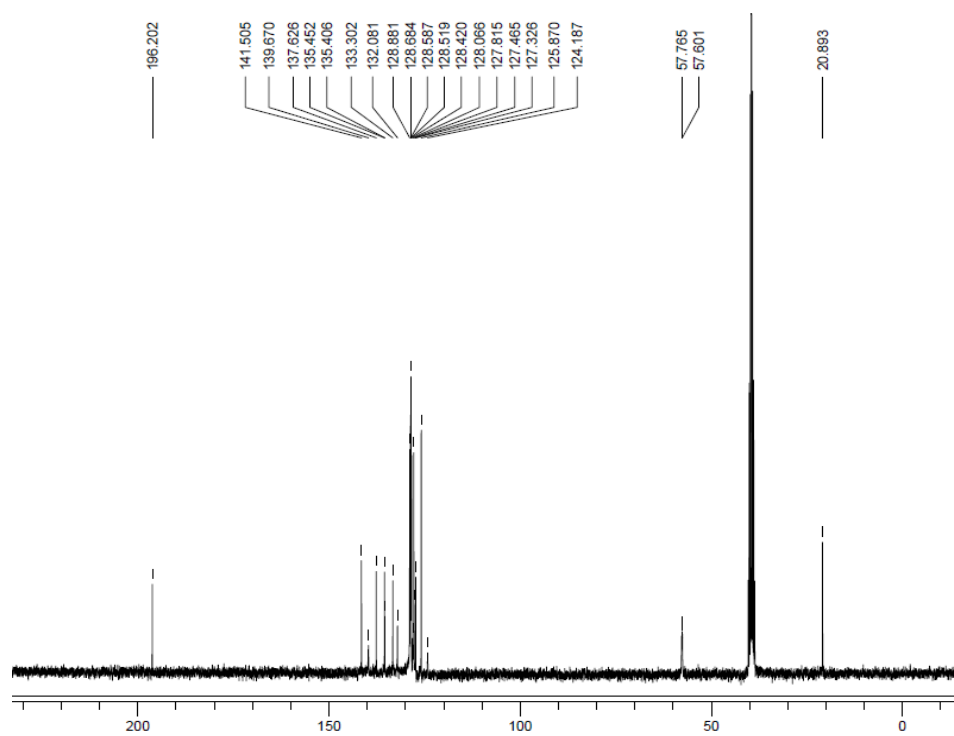

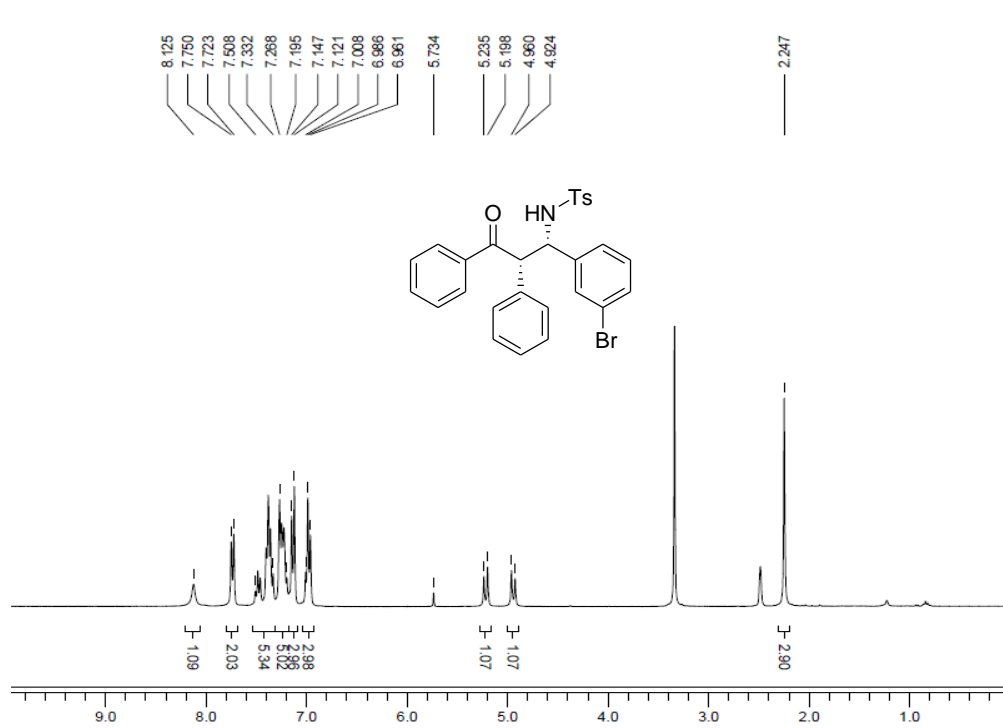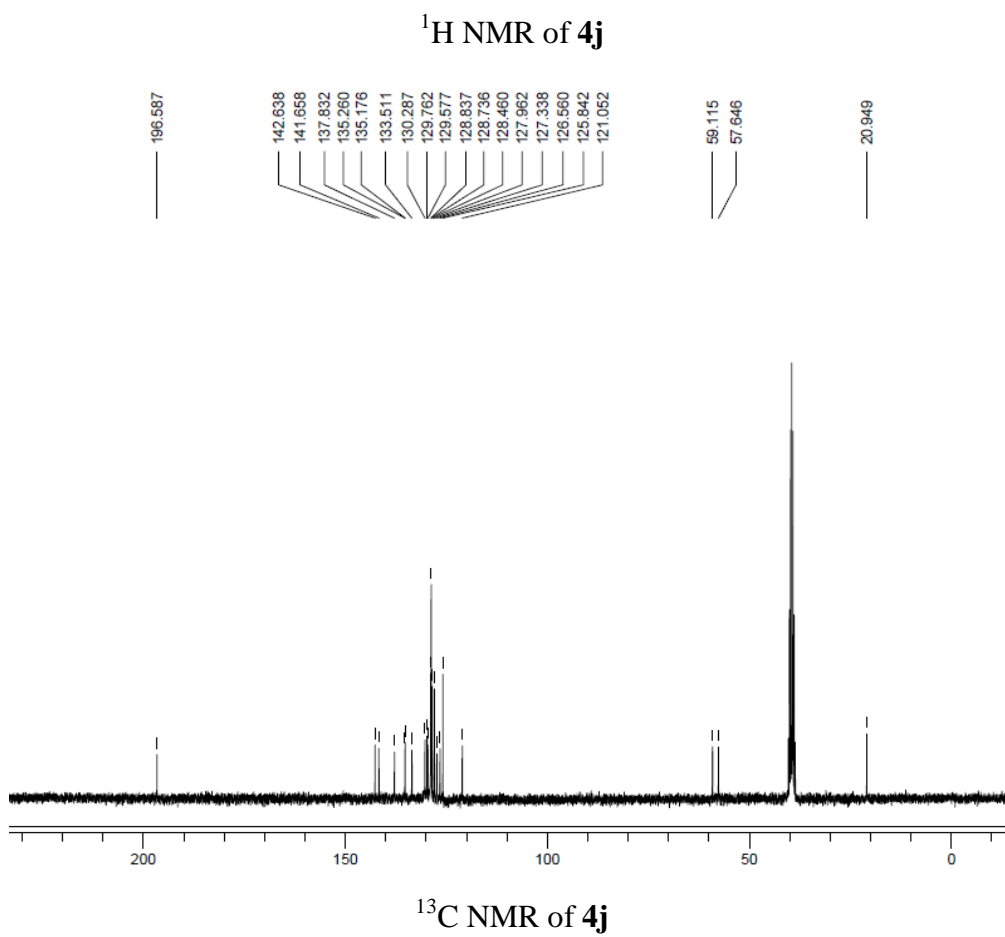

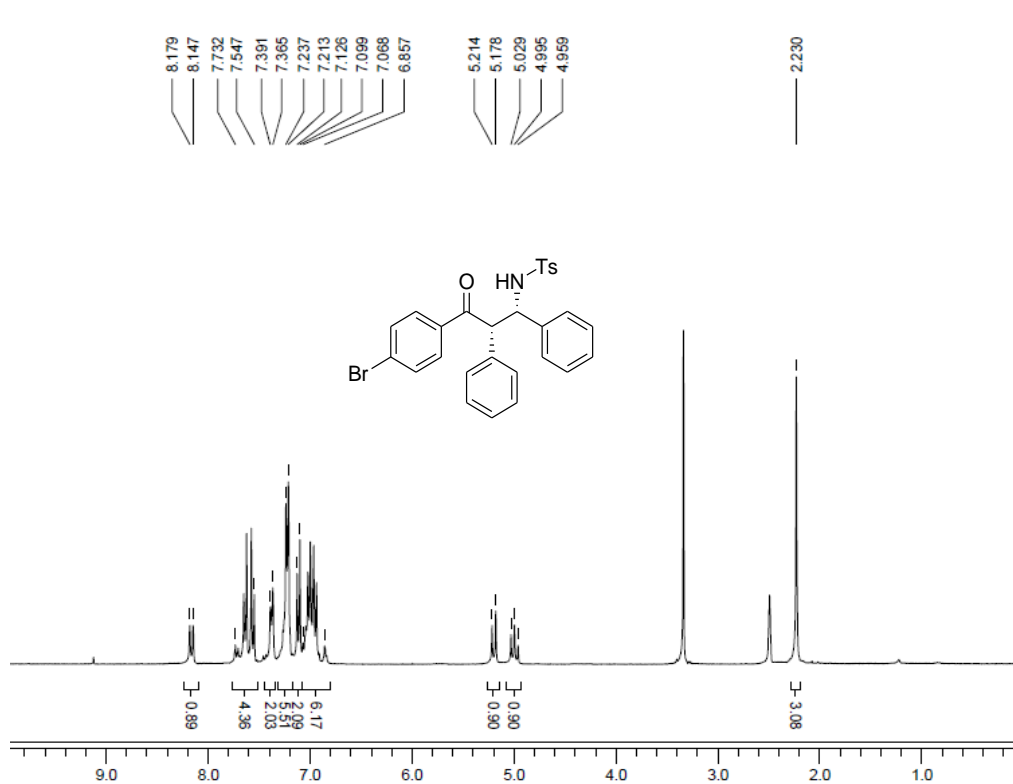

<sup>1</sup>H NMR of **4k**

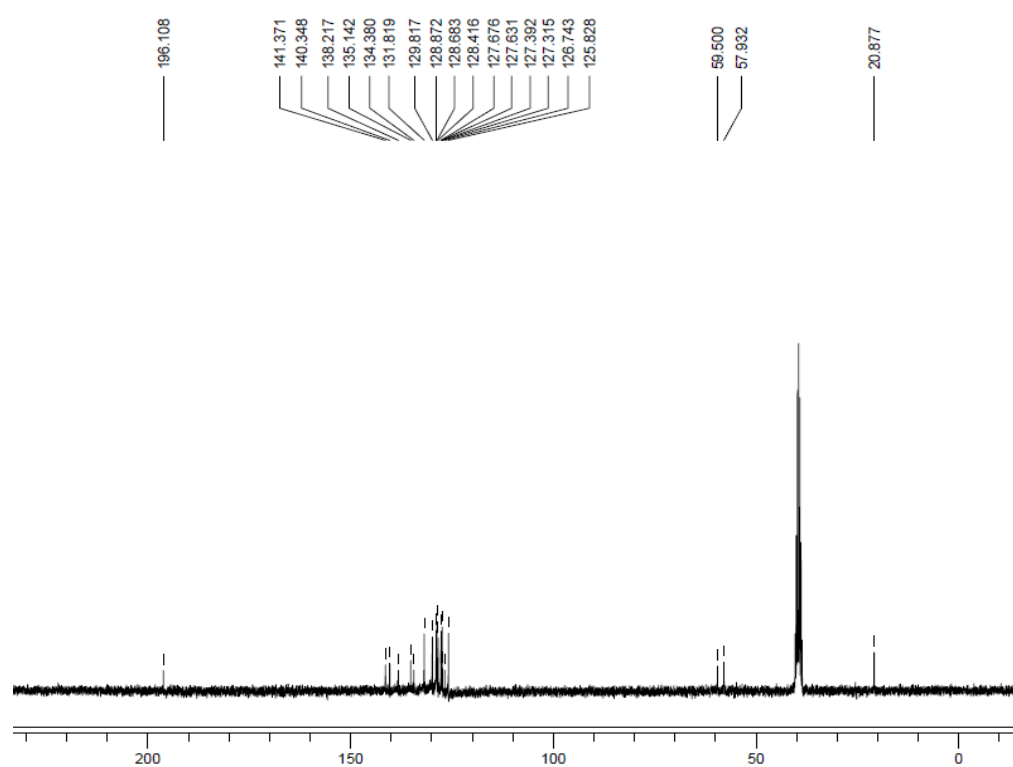

<sup>13</sup>C NMR of **4k**

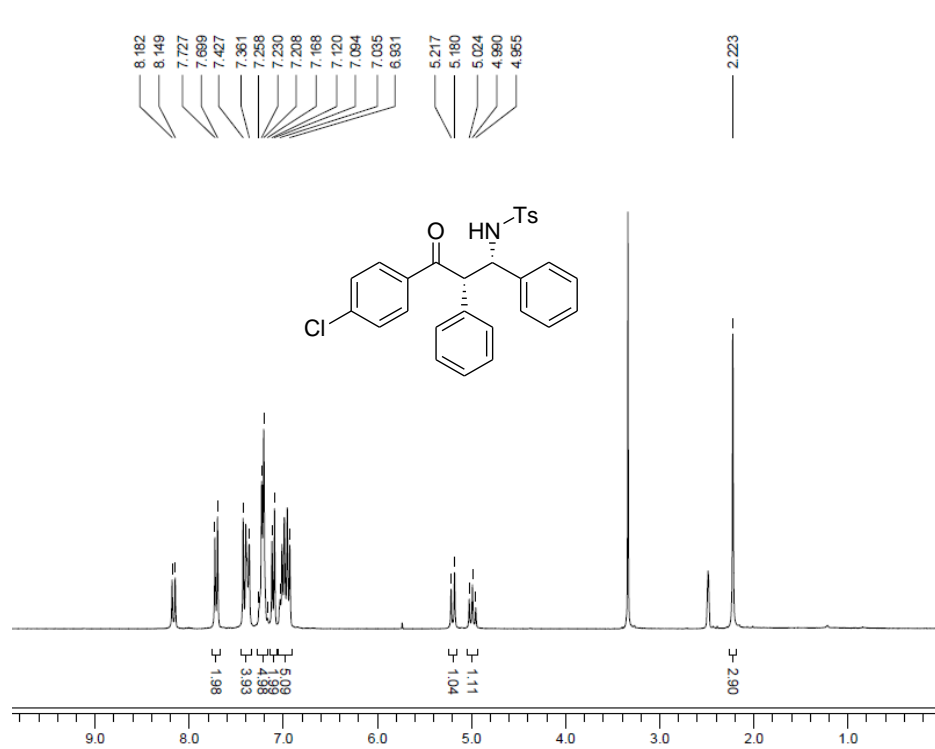

<sup>1</sup>H NMR of **4I**

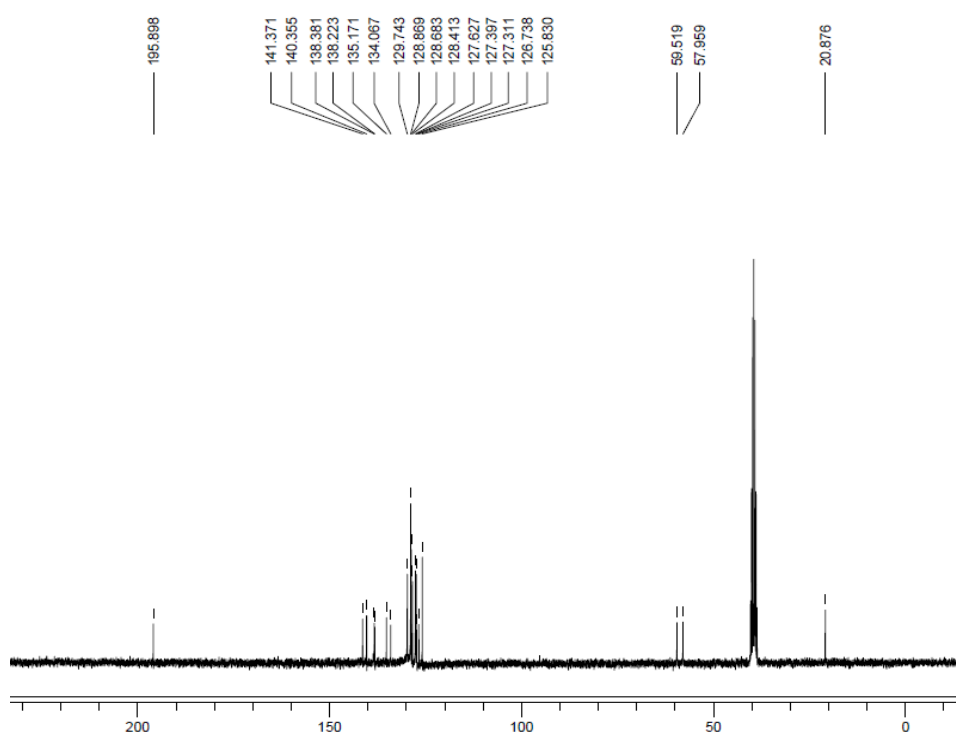

<sup>13</sup>C NMR of **4I**

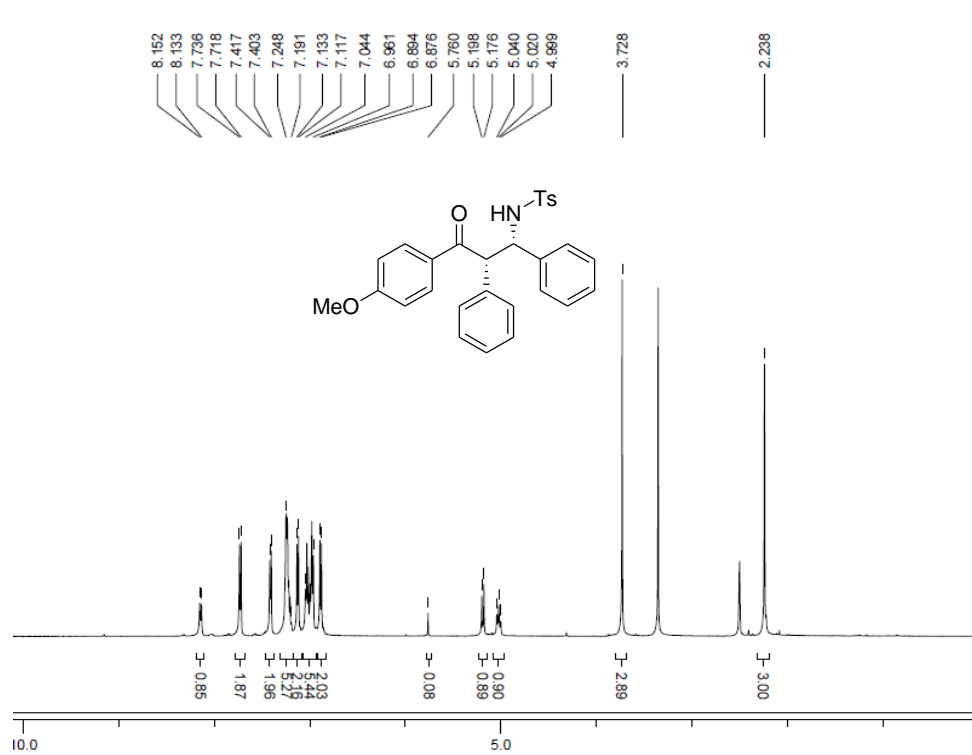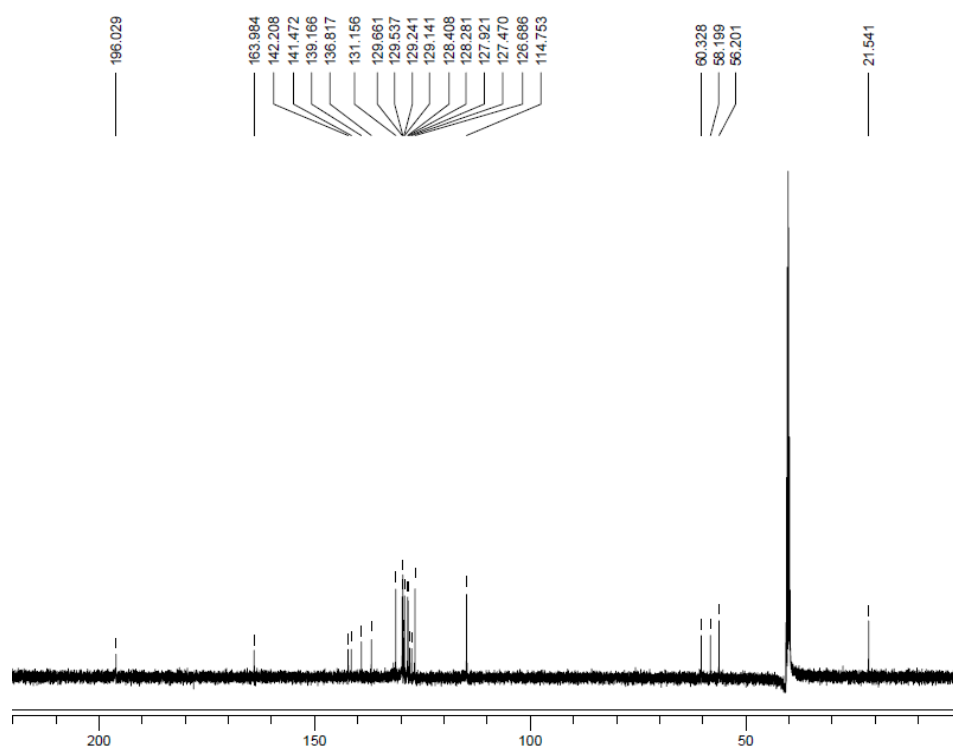

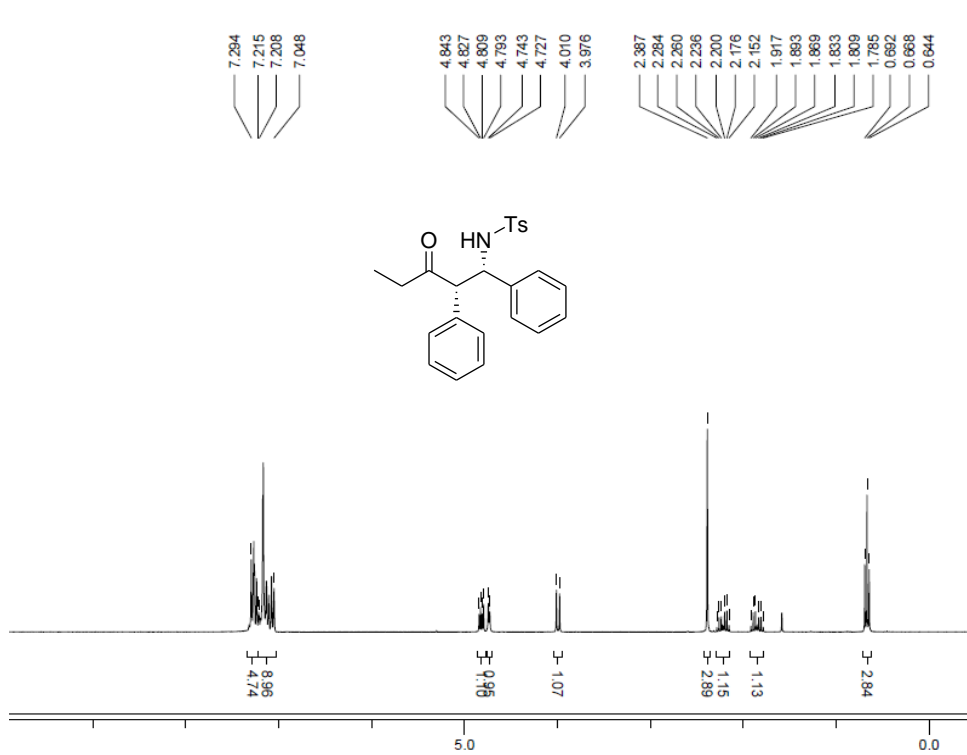

<sup>1</sup>H NMR of **4n**

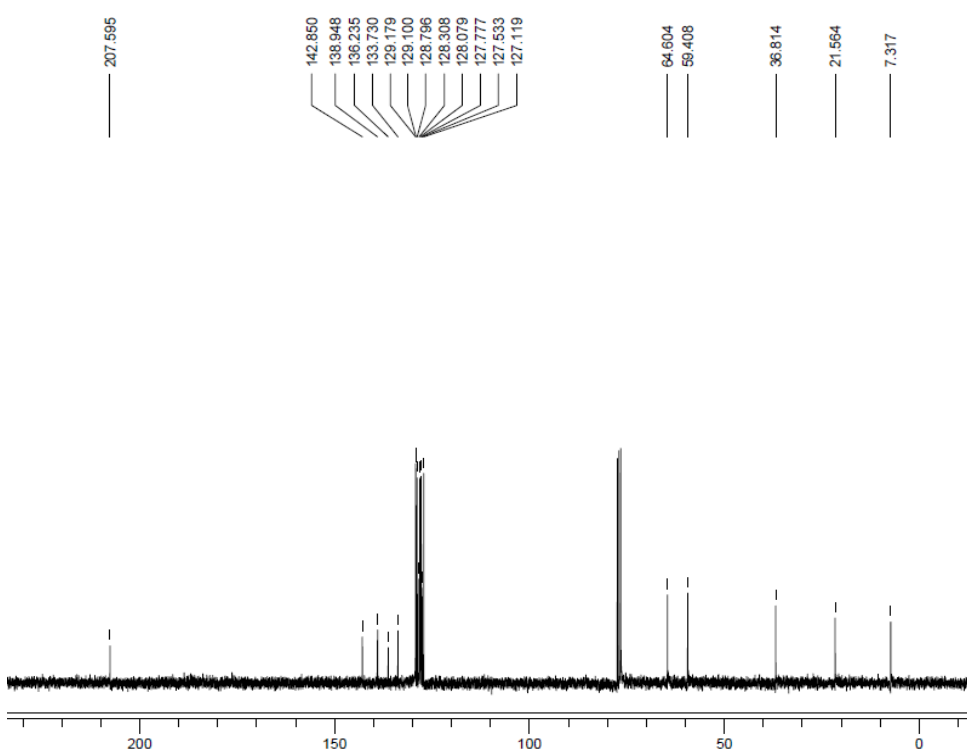

<sup>13</sup>C NMR of **4n**

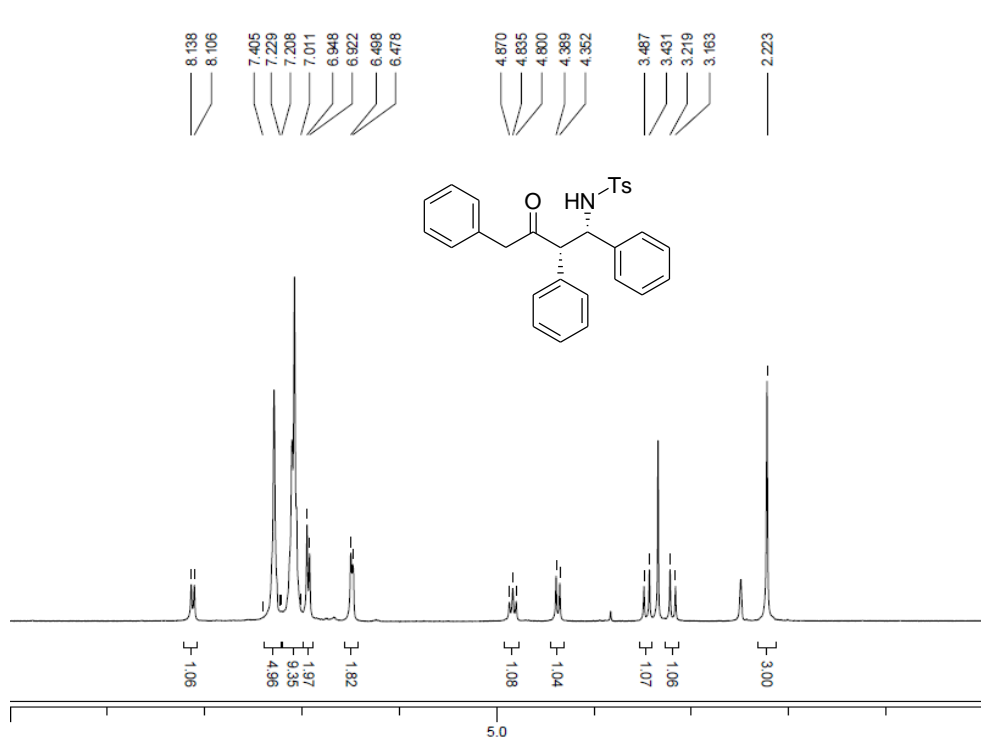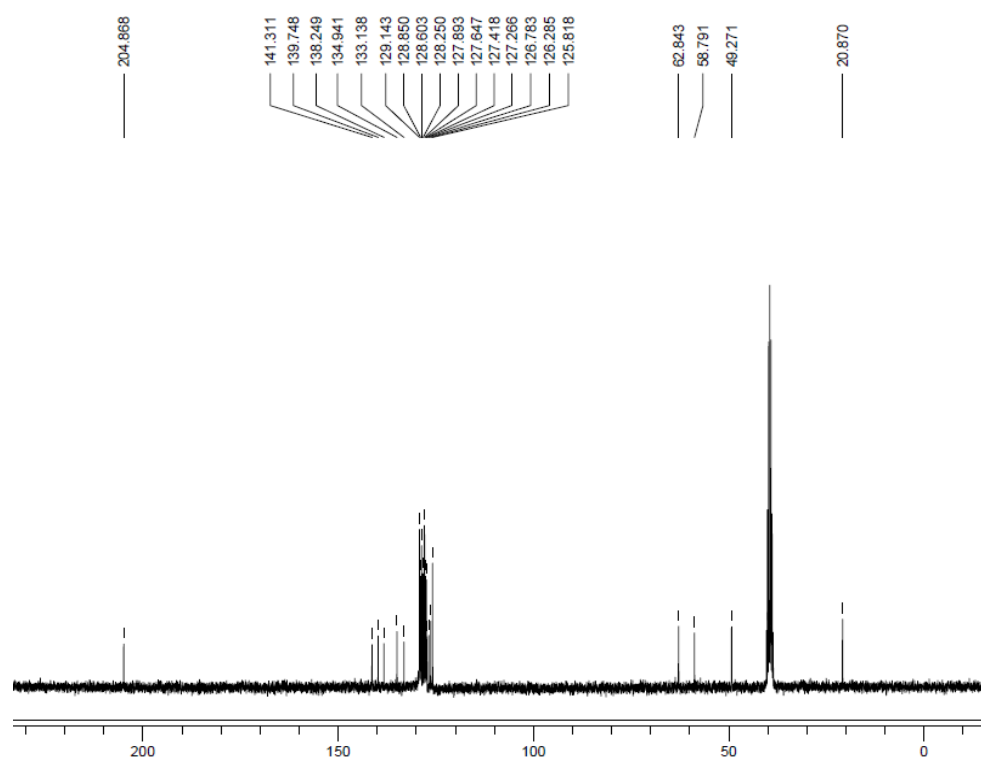

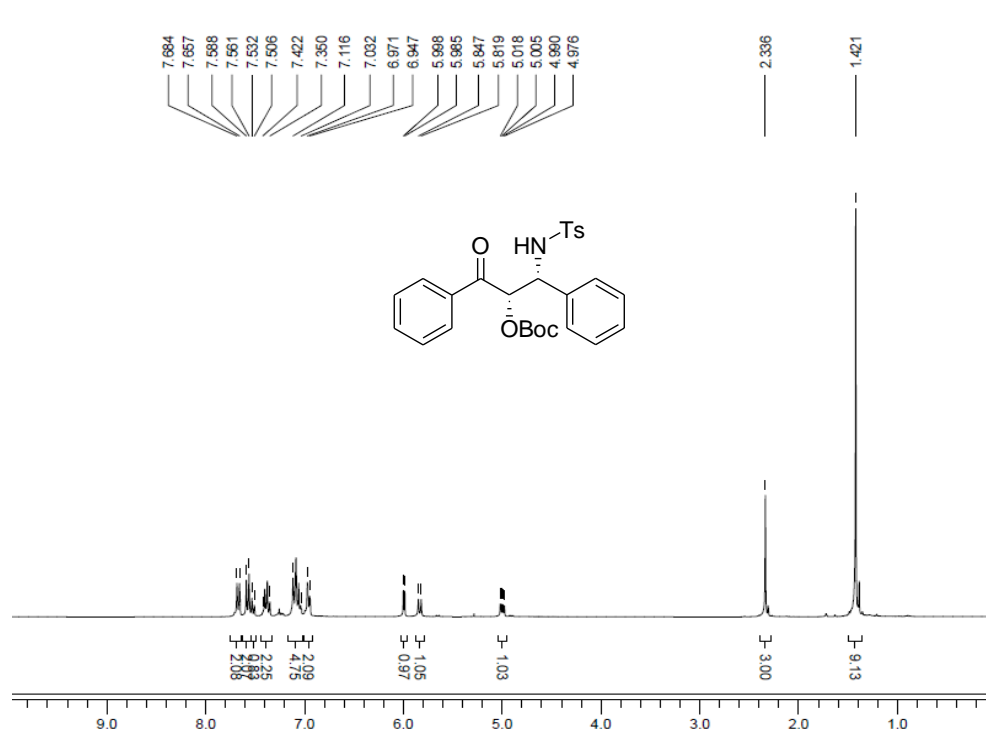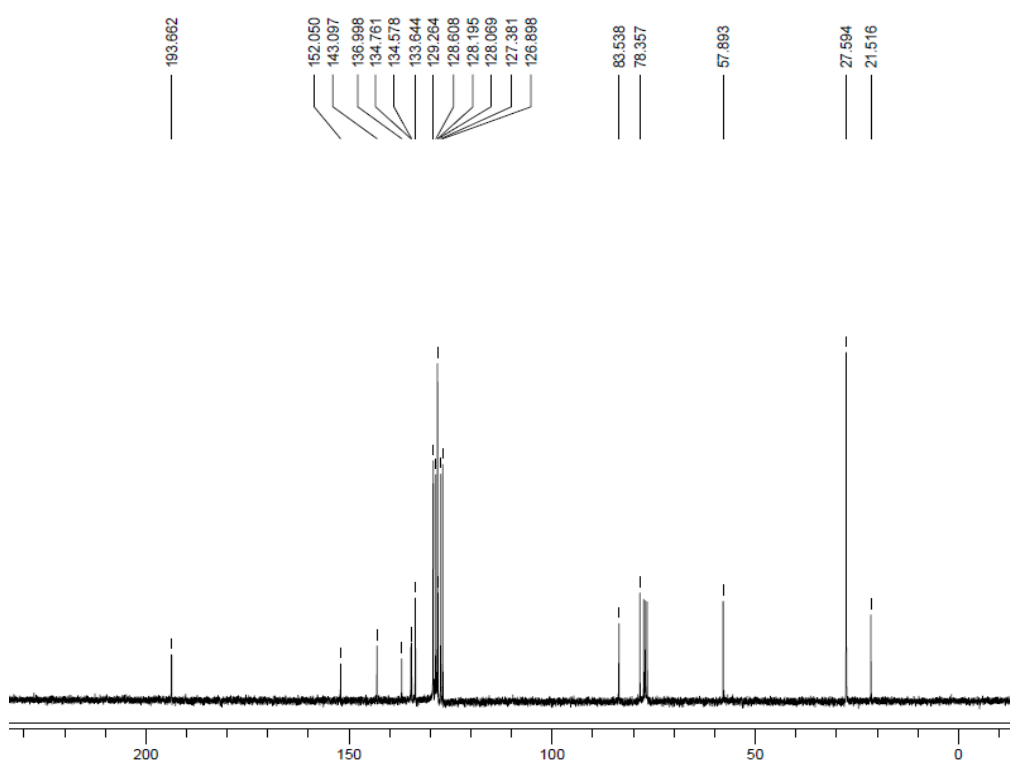



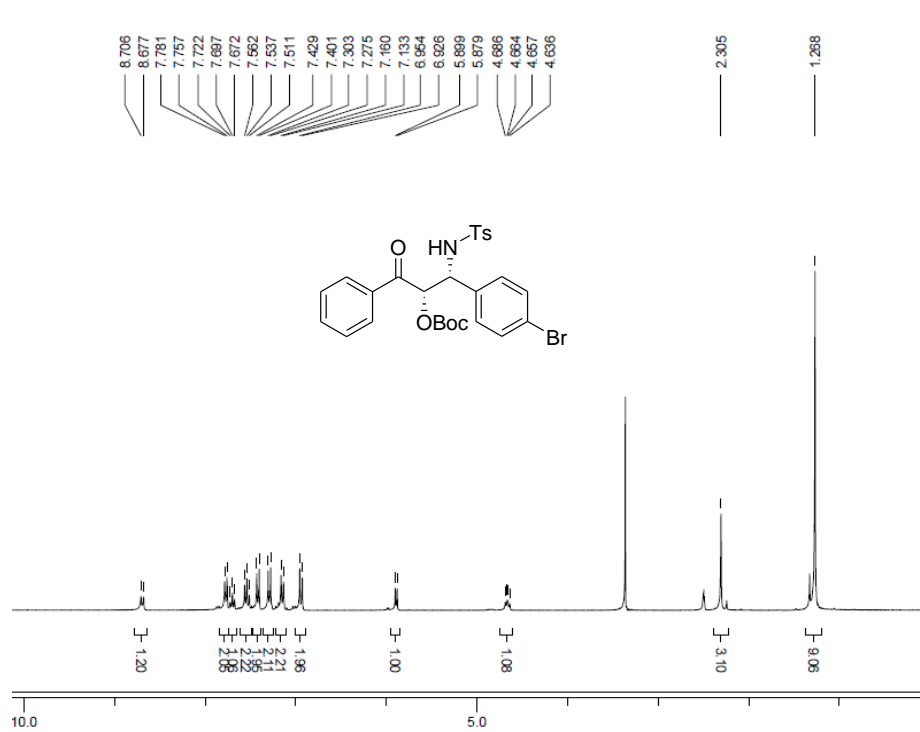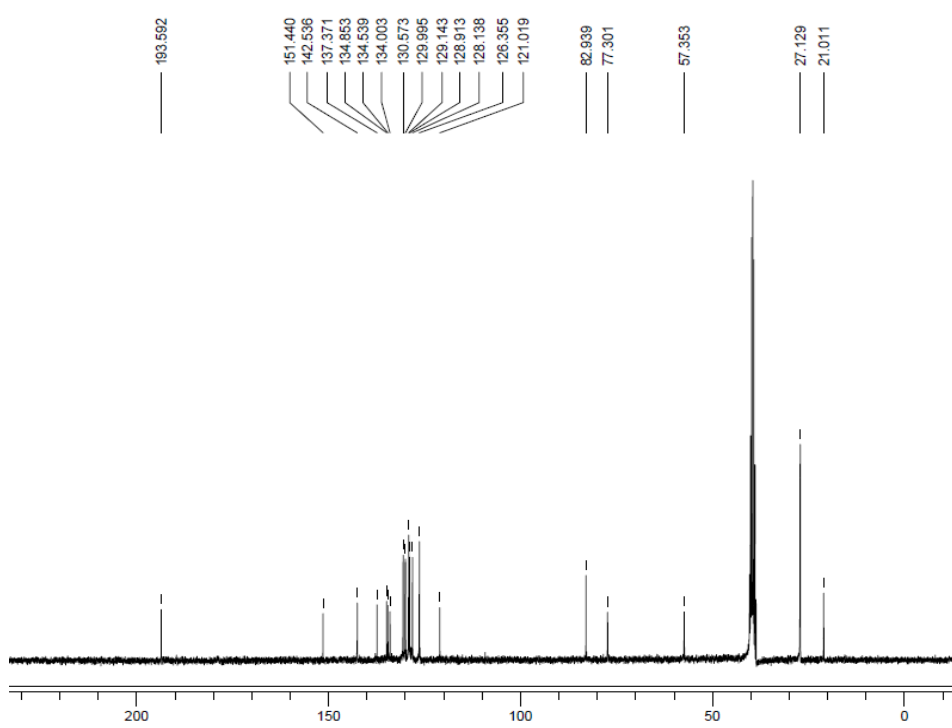

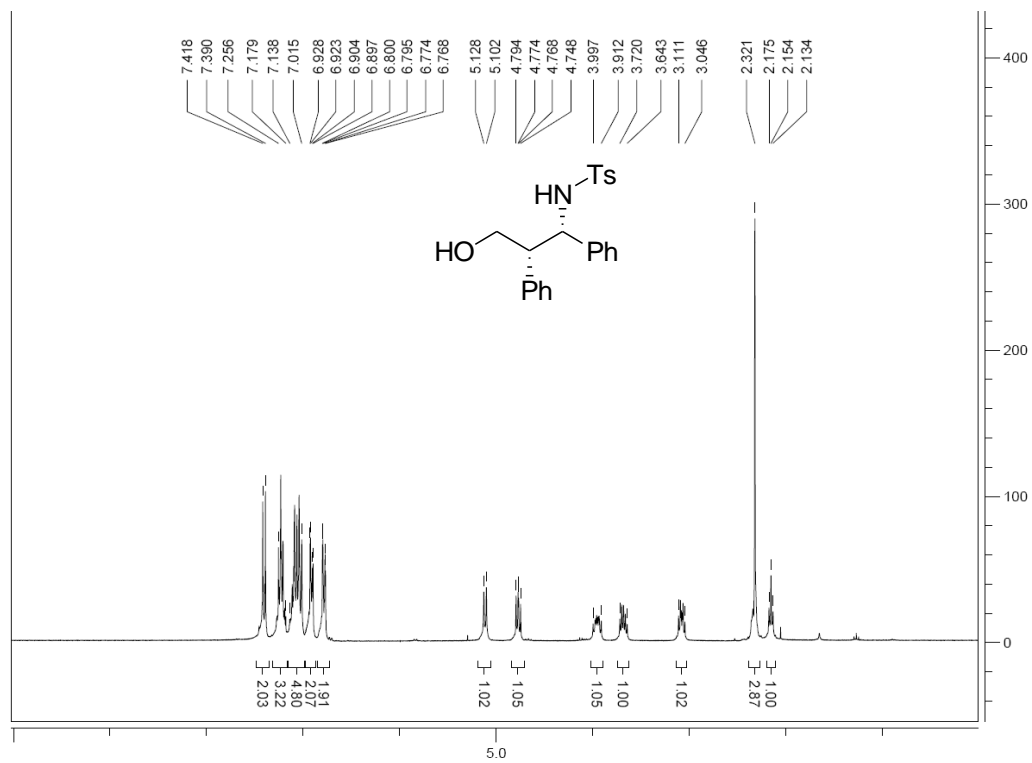

<sup>1</sup>H NMR of 13

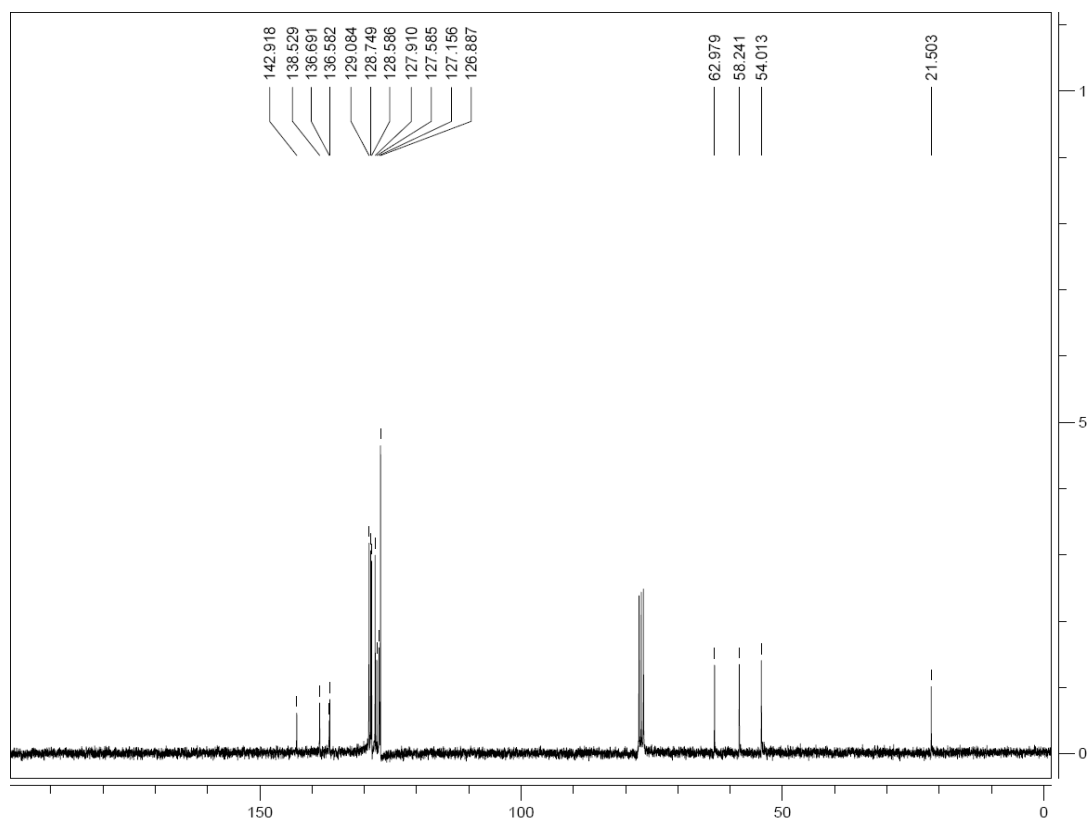

<sup>13</sup>C NMR of 13

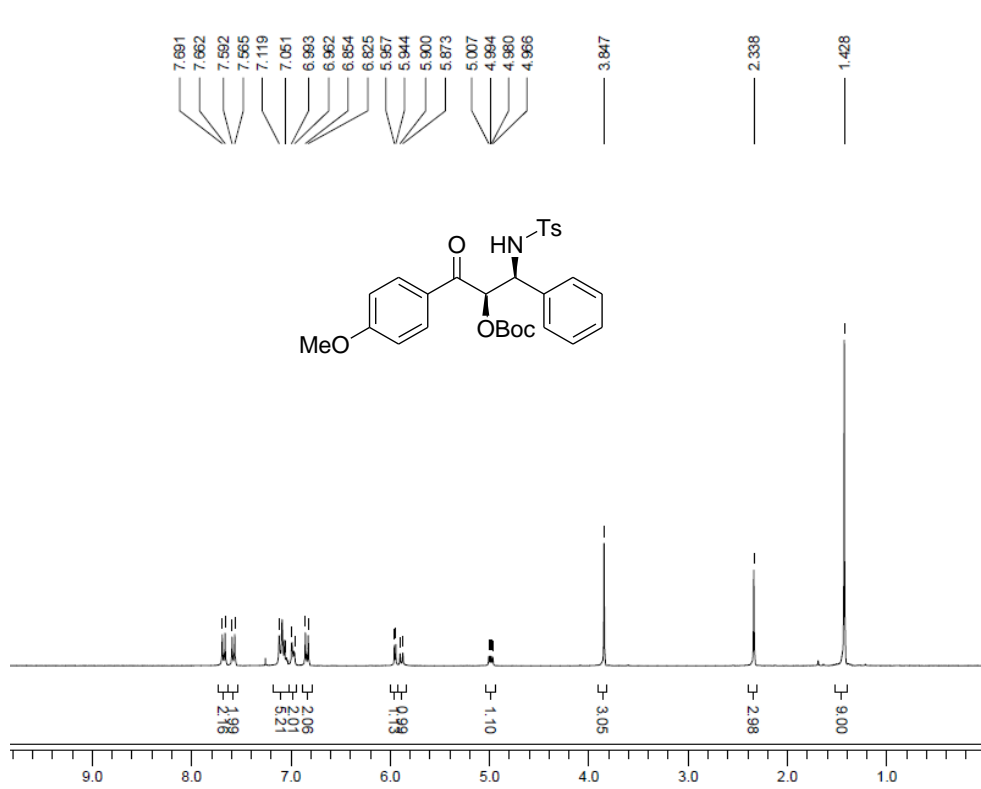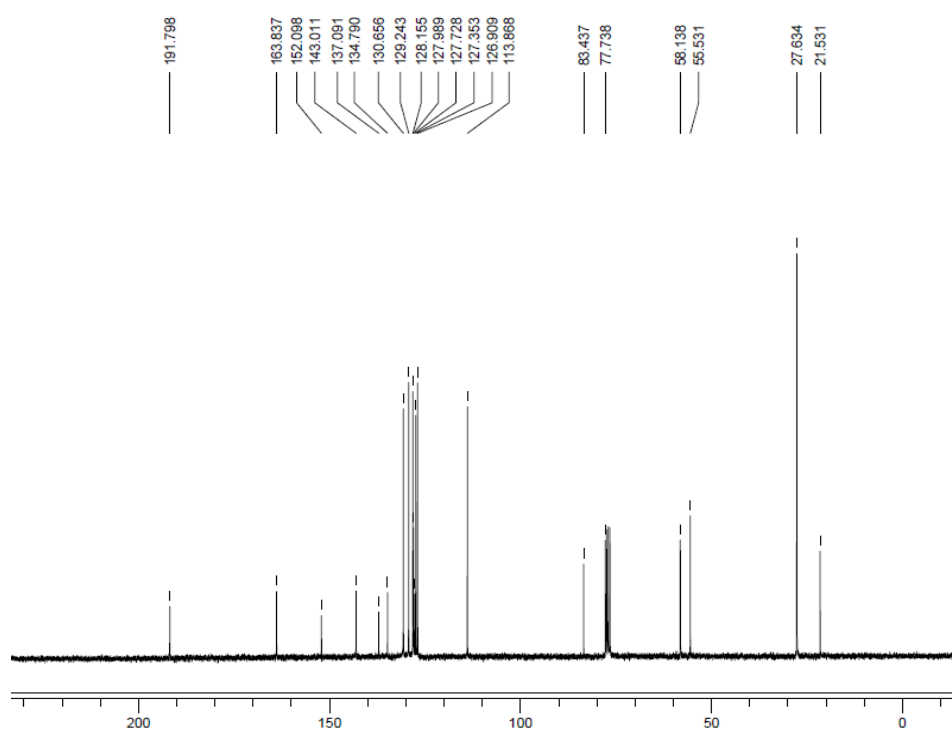

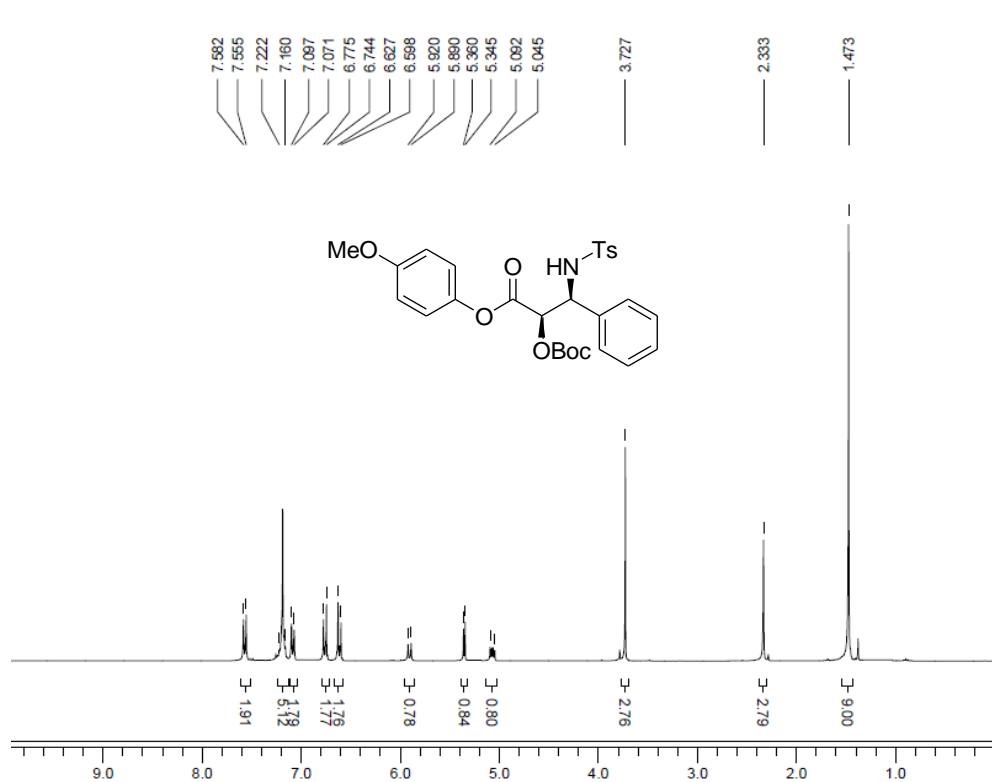

**<sup>1</sup>H NMR of 14**

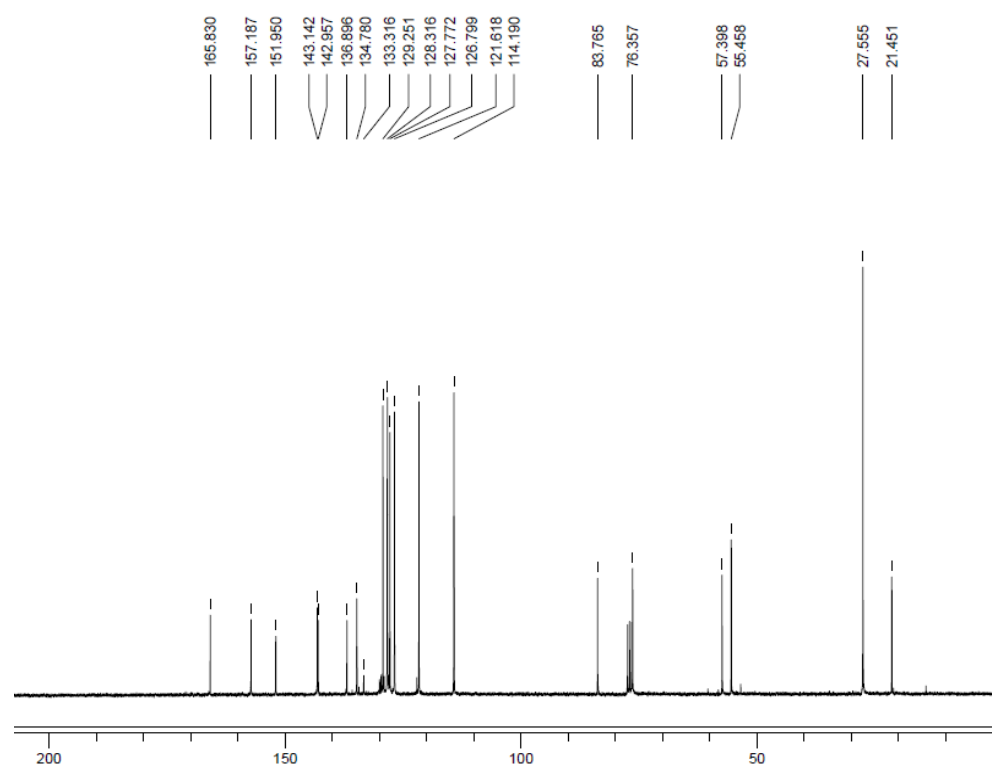

**<sup>13</sup>C NMR of 14**

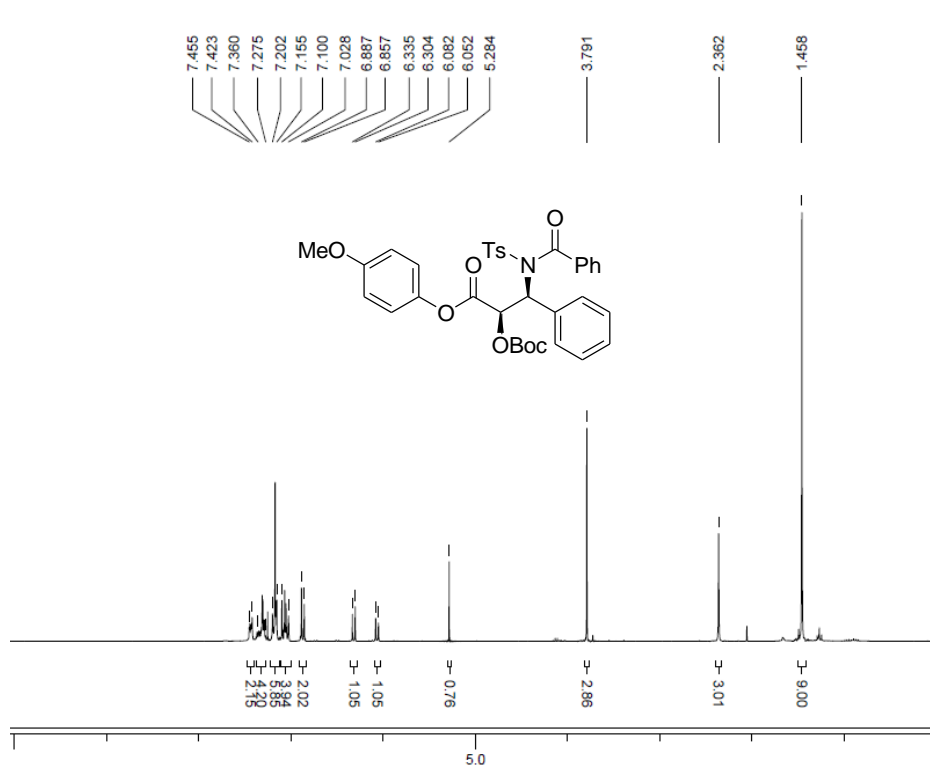

<sup>1</sup>H NMR of 15

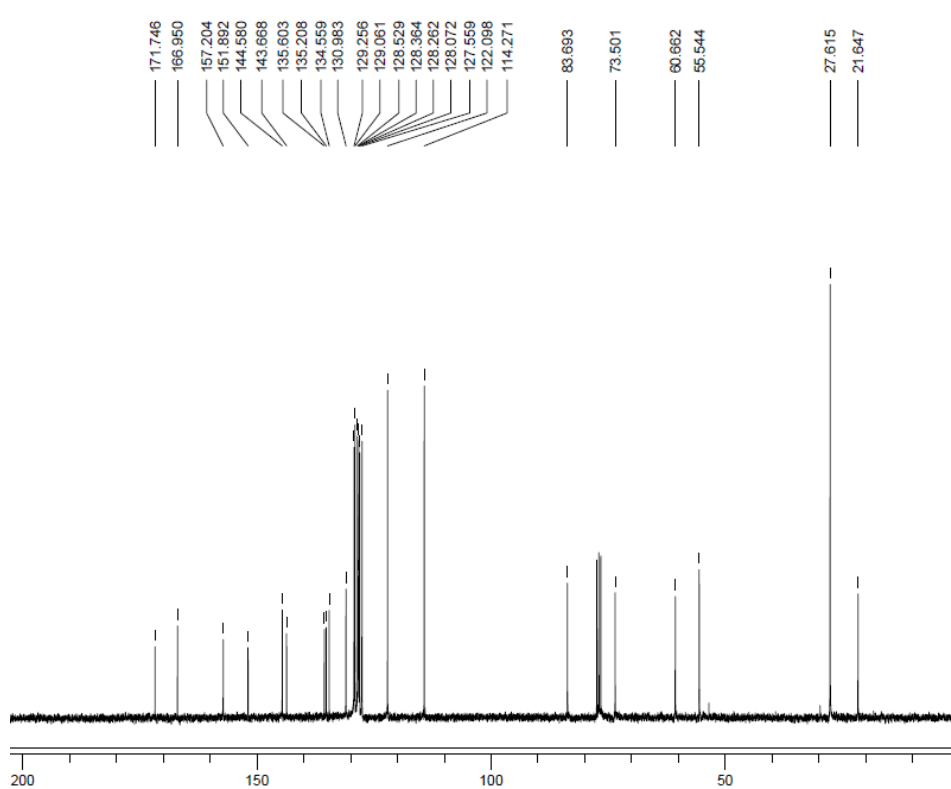

<sup>13</sup>C NMR of 15

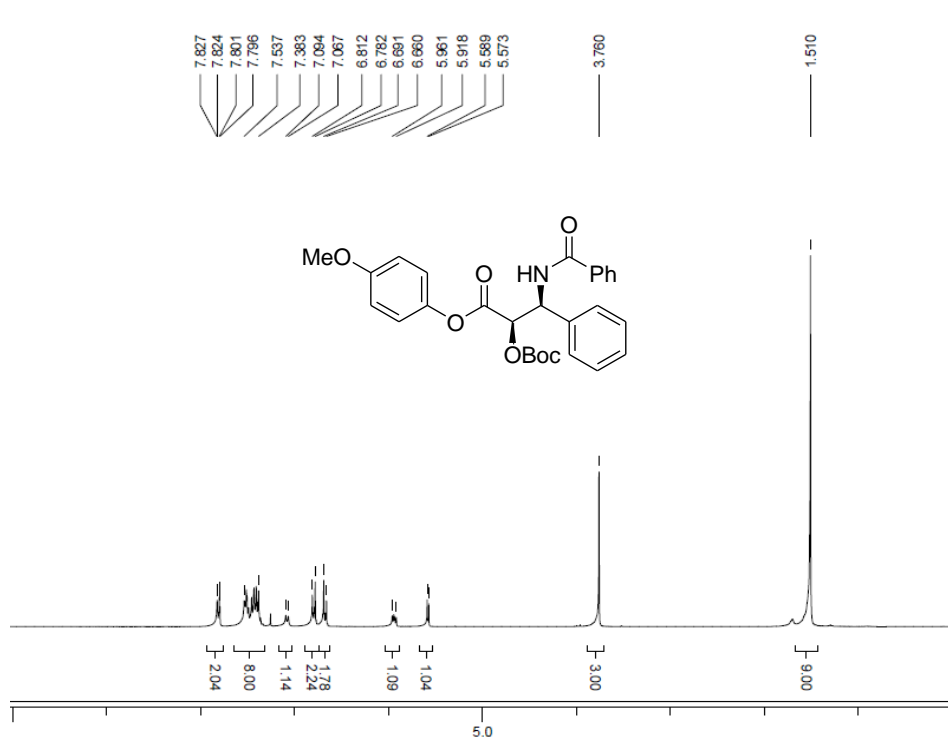

**<sup>1</sup>H NMR of 16**

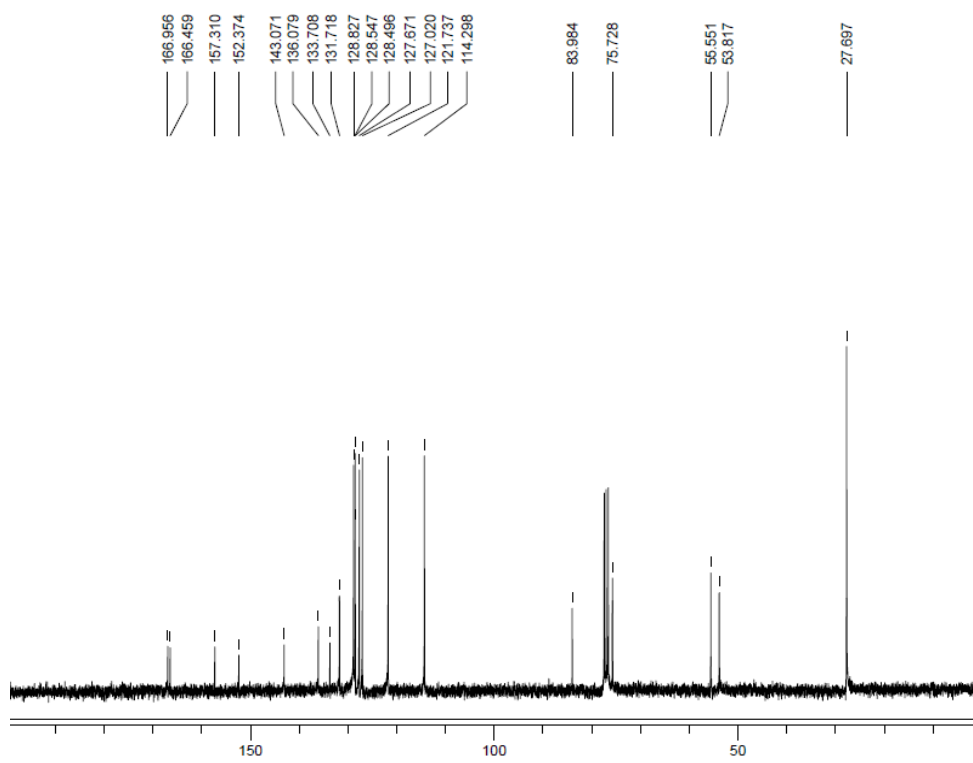

**<sup>13</sup>C NMR of 16**

==== Shimadzu LCsolution LC Data Image ====

<Chromatogram>

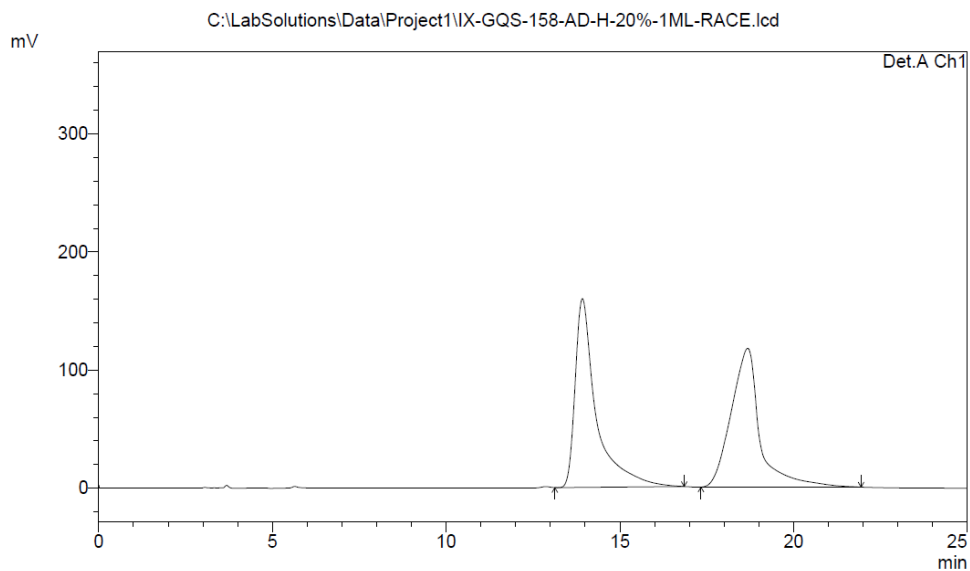

PeakTable

Detector A Ch1 254nm

| Peak# | Ret. Time | Area     | Height | Area %  | Height % |
|-------|-----------|----------|--------|---------|----------|
| 1     | 13.915    | 6768456  | 159869 | 50.013  | 57.633   |
| 2     | 18.673    | 6764830  | 117523 | 49.987  | 42.367   |
| Total |           | 13533286 | 277392 | 100.000 | 100.000  |

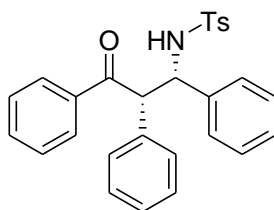

(2S\*,3S\*)-1,2,3-Triphenyl-3-(tosylamino)propan-1-one (**4a**)

==== Shimadzu LCsolution LC Data Image ====

<Chromatogram>

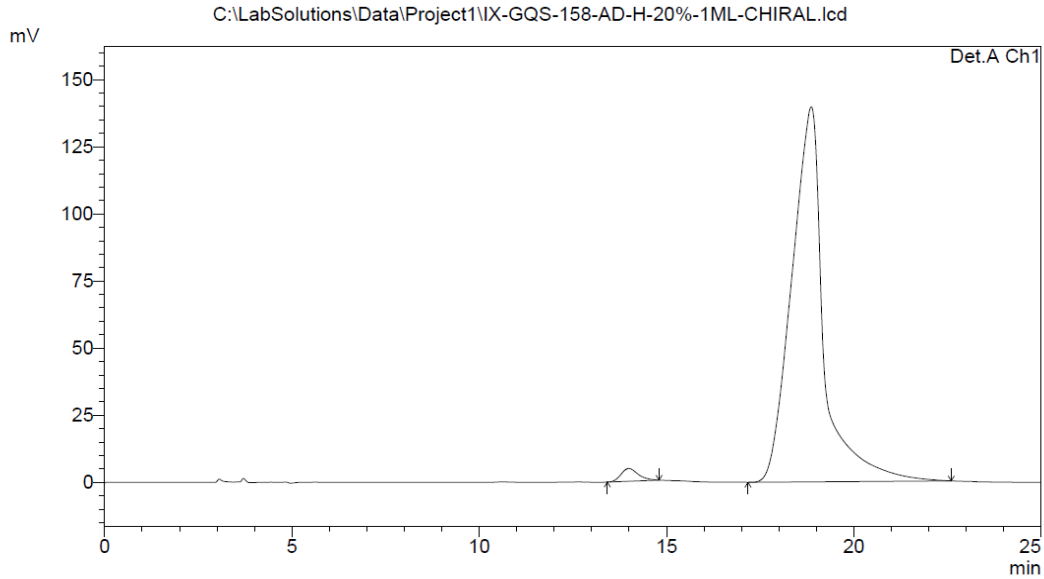

Detector A Ch1 254nm

PeakTable

| Peak# | Ret. Time | Area    | Height | Area %  | Height % |
|-------|-----------|---------|--------|---------|----------|
| 1     | 13.985    | 152761  | 4784   | 1.794   | 3.311    |
| 2     | 18.858    | 8360426 | 139698 | 98.206  | 96.689   |
| Total |           | 8513187 | 144482 | 100.000 | 100.000  |

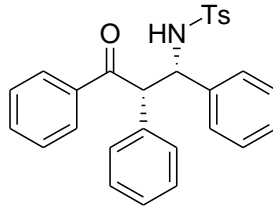

(2S,3S)-1,2,3-Triphenyl-3-(tosylamino)propan-1-one (**4a**)



==== Shimadzu LCsolution LC Data Image ====

<Chromatogram>

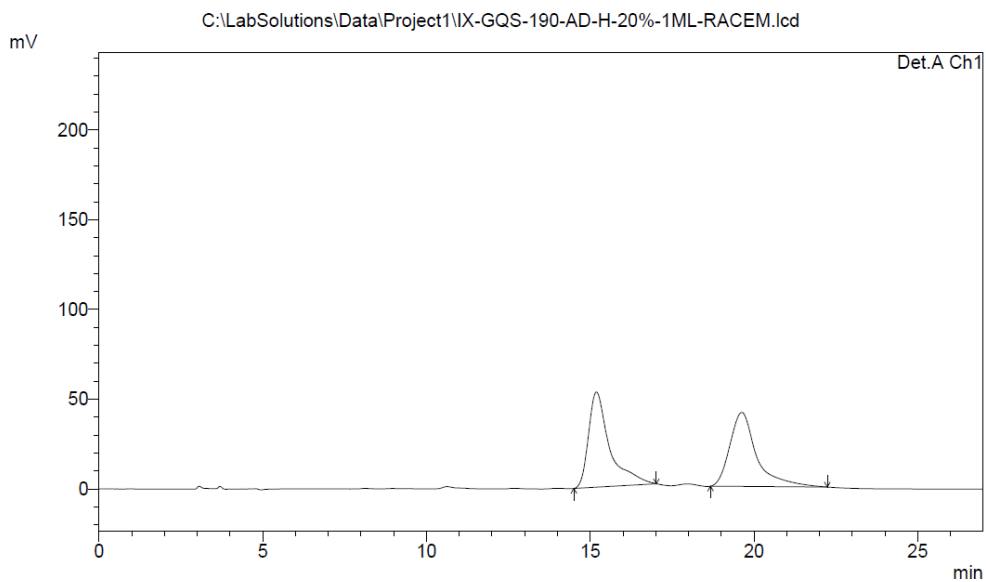

PeakTable

Detector A Ch1 254nm

| Peak# | Ret. Time | Area    | Height | Area %  | Height % |
|-------|-----------|---------|--------|---------|----------|
| 1     | 15.184    | 2386690 | 53027  | 50.416  | 56.256   |
| 2     | 19.623    | 2347323 | 41233  | 49.584  | 43.744   |
| Total |           | 4734013 | 94260  | 100.000 | 100.000  |

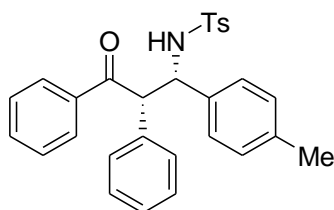

(2S\*,3S\*)-3-(4-Methylphenyl)-1,2-diphenyl-3-(tosylamino)propan-1-one (**4b**)

==== Shimadzu LCsolution LC Data Image ====

<Chromatogram>

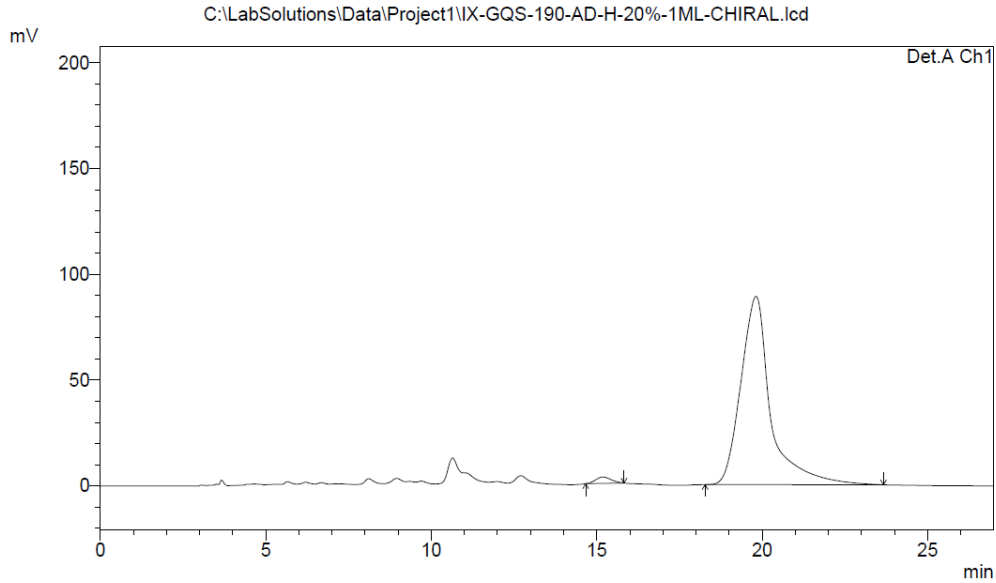

PeakTable

| Peak# | Ret. Time | Area    | Height | Area %  | Height % |
|-------|-----------|---------|--------|---------|----------|
| 1     | 15.183    | 100347  | 3058   | 1.768   | 3.323    |
| 2     | 19.809    | 5576878 | 88962  | 98.232  | 96.677   |
| Total |           | 5677224 | 92020  | 100.000 | 100.000  |

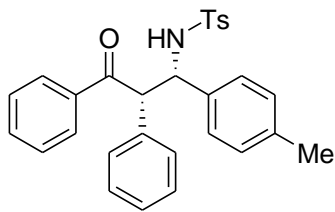

(2S,3S)-3-(4-Methylphenyl)-1,2-diphenyl-3-(tosylamino)propan-1-one (**4b**)

==== Shimadzu LCsolution LC Data Image ====

<Chromatogram>

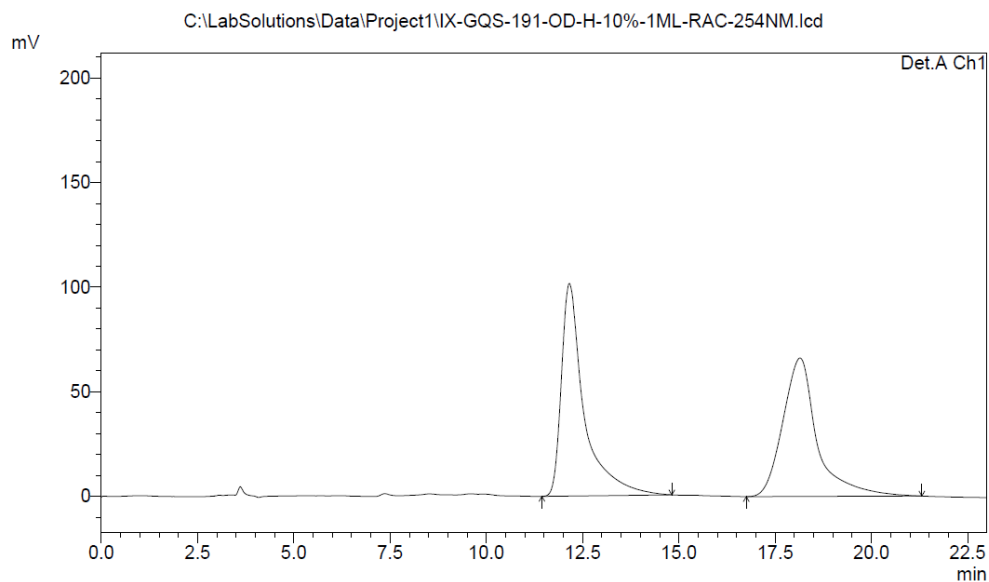

PeakTable

Detector A Ch1 254nm

| Peak# | Ret. Time | Area    | Height | Area %  | Height % |
|-------|-----------|---------|--------|---------|----------|
| 1     | 12.152    | 4176394 | 101713 | 50.481  | 60.570   |
| 2     | 18.140    | 4096736 | 66214  | 49.519  | 39.430   |
| Total |           | 8273130 | 167926 | 100.000 | 100.000  |

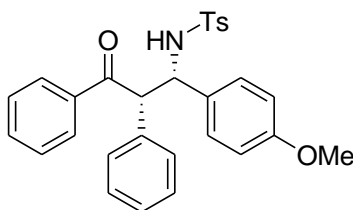

(2*S*\*,3*S*\*)-3-(4-Methoxyphenyl)-1,2-diphenyl-3-(tosylamino)propan-1-one (**4c**)

==== Shimadzu LCsolution LC Data Image ====

<Chromatogram>

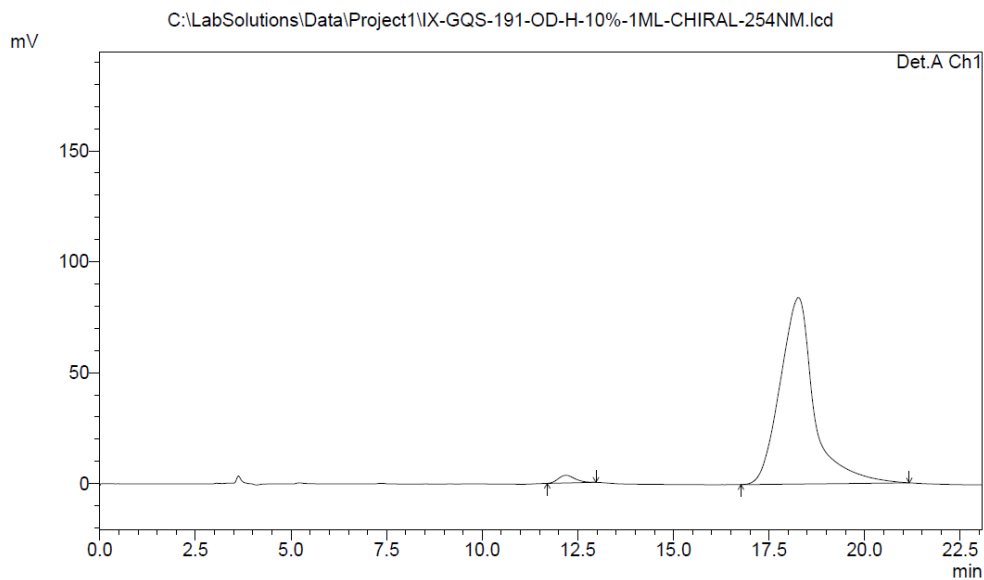

PeakTable

| Peak# | Ret. Time | Area    | Height | Area %  | Height % |
|-------|-----------|---------|--------|---------|----------|
| 1     | 12.182    | 104037  | 3441   | 1.970   | 3.935    |
| 2     | 18.263    | 5177304 | 84021  | 98.030  | 96.065   |
| Total |           | 5281341 | 87463  | 100.000 | 100.000  |

Detector A Ch1 254nm

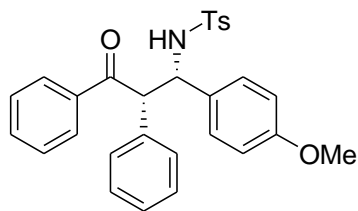

(2S,3S)-3-(4-Methoxyphenyl)-1,2-diphenyl-3-(tosylamino)propan-1-one (**4c**)

==== Shimadzu LCsolution LC Data Image ====

<Chromatogram>

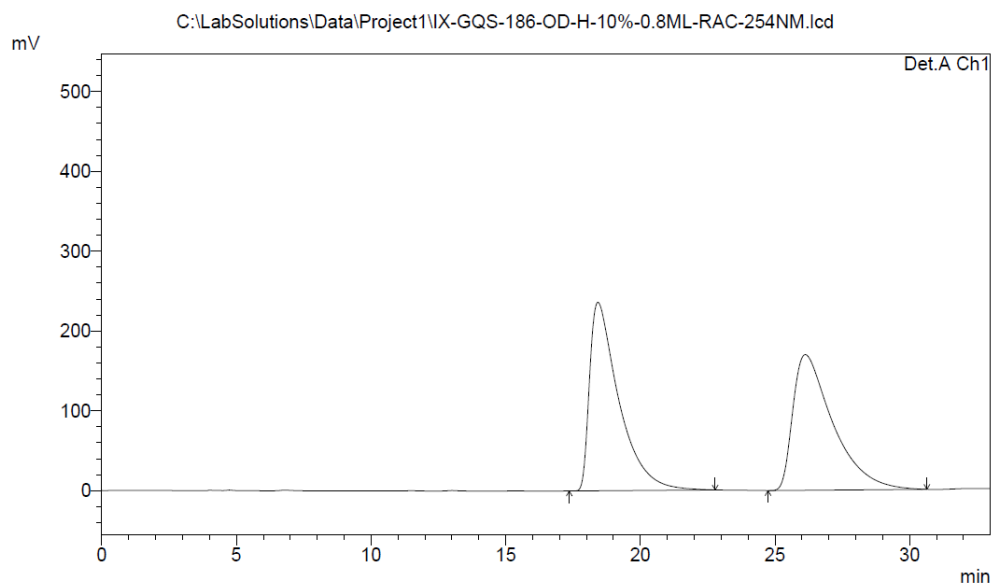

PeakTable

Detector A Ch1 254nm

| Peak# | Ret. Time | Area     | Height | Area %  | Height % |
|-------|-----------|----------|--------|---------|----------|
| 1     | 18.420    | 17829446 | 236210 | 50.357  | 58.153   |
| 2     | 26.121    | 17576692 | 169980 | 49.643  | 41.847   |
| Total |           | 35406138 | 406190 | 100.000 | 100.000  |

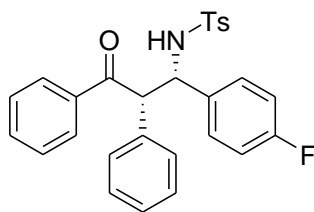

(2S\*,3S\*)-3-(4-Fluorophenyl)-1,2-diphenyl-3-(tosylamino)propan-1-one (**4d**)

==== Shimadzu LCsolution LC Data Image ====

<Chromatogram>

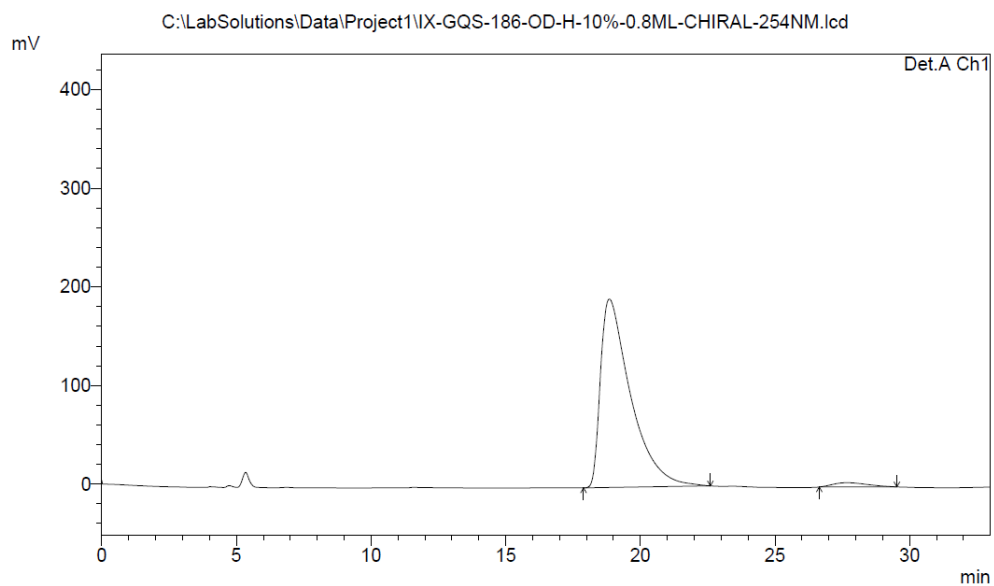

PeakTable

Detector A Ch1 254nm

| Peak# | Ret. Time | Area     | Height | Area %  | Height % |
|-------|-----------|----------|--------|---------|----------|
| 1     | 18.845    | 14873115 | 191150 | 97.477  | 97.773   |
| 2     | 27.669    | 384885   | 4355   | 2.523   | 2.227    |
| Total |           | 15258000 | 195505 | 100.000 | 100.000  |

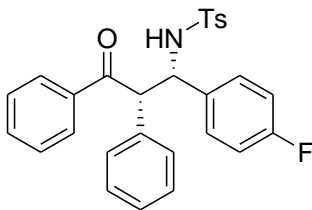

(2S,3S)-3-(4-Fluorophenyl)-1,2-diphenyl-3-(tosylamino)propan-1-one (**4d**)

==== Shimadzu LCsolution LC Data Image ====

<Chromatogram>

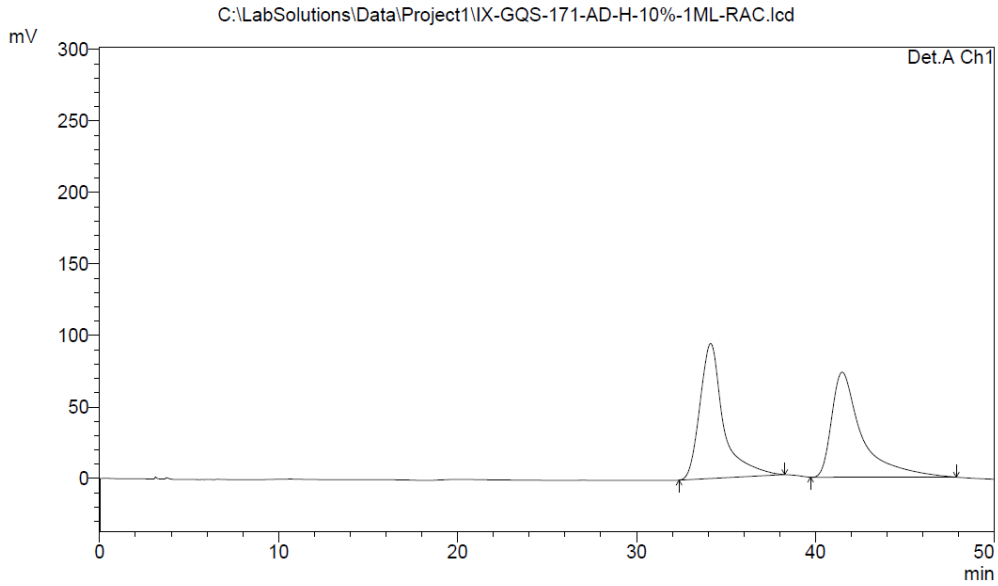

PeakTable

| Peak# | Ret. Time | Area     | Height | Area %  | Height % |
|-------|-----------|----------|--------|---------|----------|
| 1     | 34.134    | 8635473  | 94359  | 50.009  | 56.216   |
| 2     | 41.484    | 8632408  | 73492  | 49.991  | 43.784   |
| Total |           | 17267881 | 167851 | 100.000 | 100.000  |

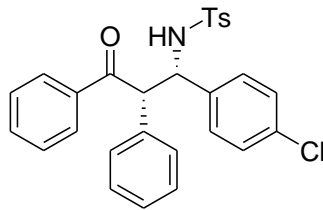

(2*S*\*,3*S*\*)-3-(4-Chlorophenyl)-1,2-diphenyl-3-(tosylamino)propan-1-one (**4e**)

==== Shimadzu LCsolution LC Data Image ====

<Chromatogram>

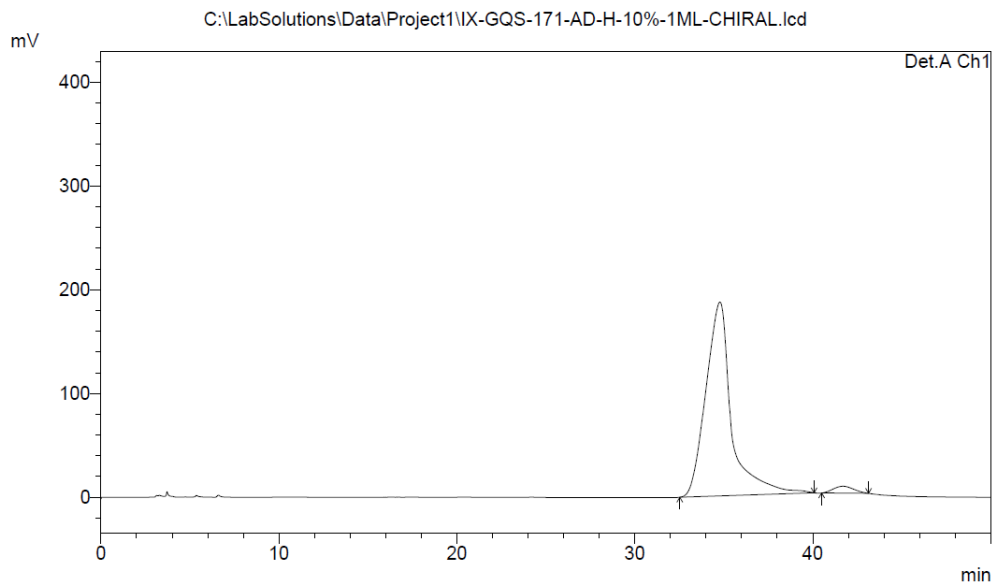

PeakTable

Detector A Ch1 254nm

| Peak# | Ret. Time | Area     | Height | Area %  | Height % |
|-------|-----------|----------|--------|---------|----------|
| 1     | 34.779    | 18748872 | 186859 | 97.241  | 96.566   |
| 2     | 41.698    | 531987   | 6644   | 2.759   | 3.434    |
| Total |           | 19280859 | 193503 | 100.000 | 100.000  |

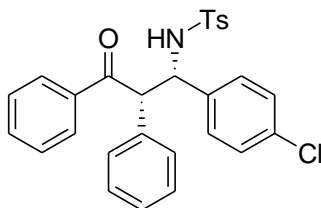

(2S,3S)-3-(4-Chlorophenyl)-1,2-diphenyl-3-(tosylamino)propan-1-one (**4e**)



==== Shimadzu LCsolution LC Data Image ====

<Chromatogram>

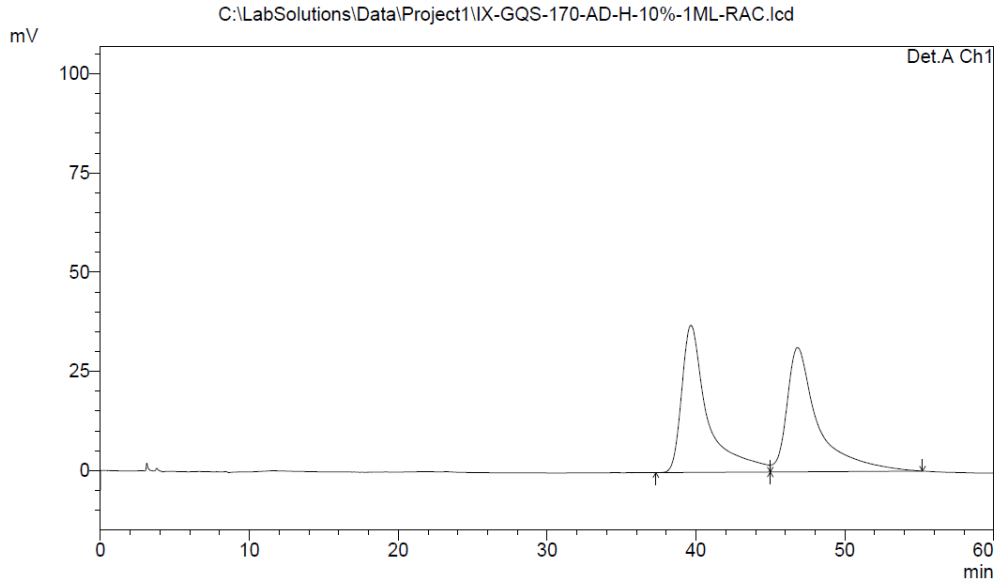

PeakTable

| Peak# | Ret. Time | Area    | Height | Area %  | Height % |
|-------|-----------|---------|--------|---------|----------|
| 1     | 39.653    | 4506606 | 37086  | 49.774  | 54.221   |
| 2     | 46.816    | 4547519 | 31312  | 50.226  | 45.779   |
| Total |           | 9054126 | 68398  | 100.000 | 100.000  |

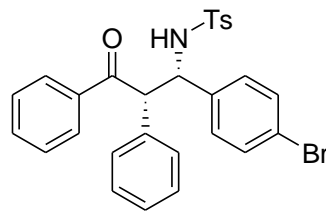

(2S\*,3S\*)-3-(4-Bromophenyl)-1,2-diphenyl-3-(tosylamino)propan-1-one (**4f**)

==== Shimadzu LCsolution LC Data Image ====

<Chromatogram>

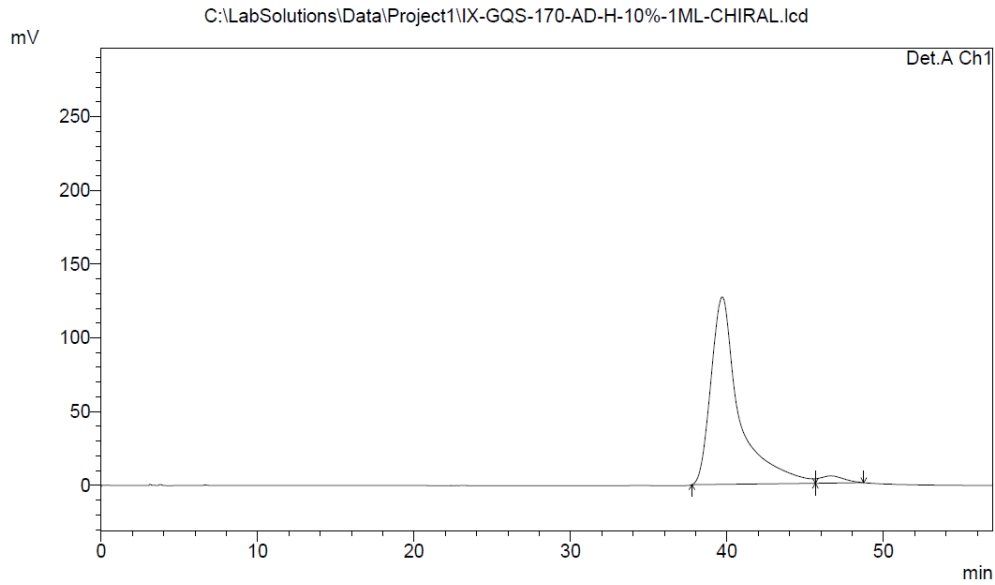

PeakTable

Detector A Ch1 254nm

| Peak# | Ret. Time | Area     | Height | Area %  | Height % |
|-------|-----------|----------|--------|---------|----------|
| 1     | 39.688    | 15960035 | 127157 | 96.827  | 96.336   |
| 2     | 46.635    | 523047   | 4837   | 3.173   | 3.664    |
| Total |           | 16483083 | 131994 | 100.000 | 100.000  |

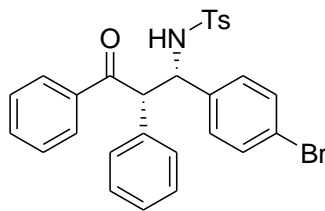

(2S,3S)-3-(4-Bromophenyl)-1,2-diphenyl-3-(tosylamino)propan-1-one (**4f**)

==== Shimadzu LCsolution LC Data Image ====

<Chromatogram>

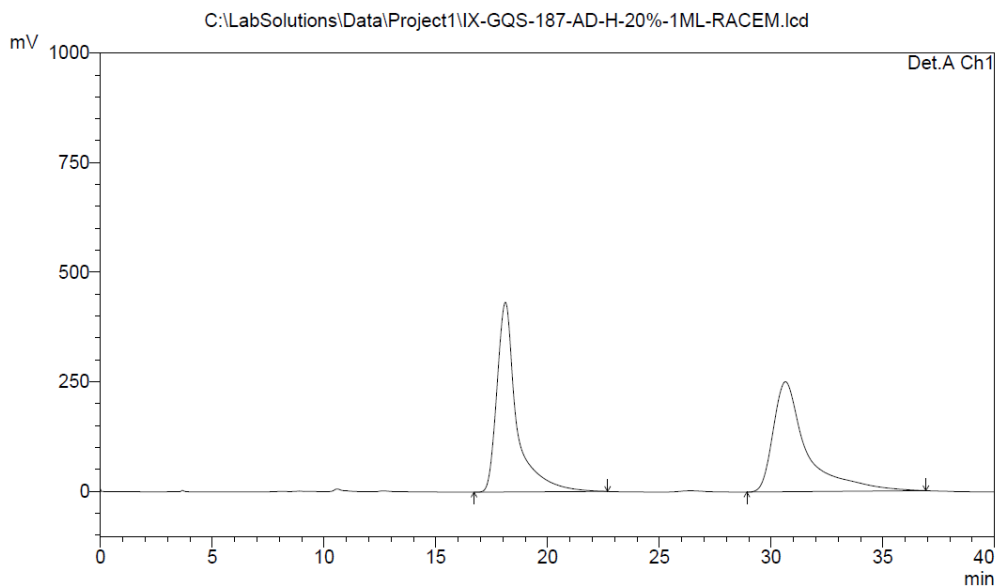

PeakTable

| Peak# | Ret. Time | Area     | Height | Area %  | Height % |
|-------|-----------|----------|--------|---------|----------|
| 1     | 18.108    | 26580241 | 432685 | 50.434  | 63.290   |
| 2     | 30.636    | 26122579 | 250971 | 49.566  | 36.710   |
| Total |           | 52702820 | 683656 | 100.000 | 100.000  |

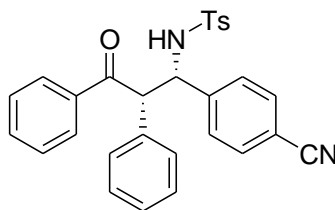

(2S\*,3S\*)-3-(4-Cyanophenyl)-1,2-diphenyl-3-(tosylamino)propan-1-one (**4g**)

==== Shimadzu LCsolution LC Data Image ====

<Chromatogram>

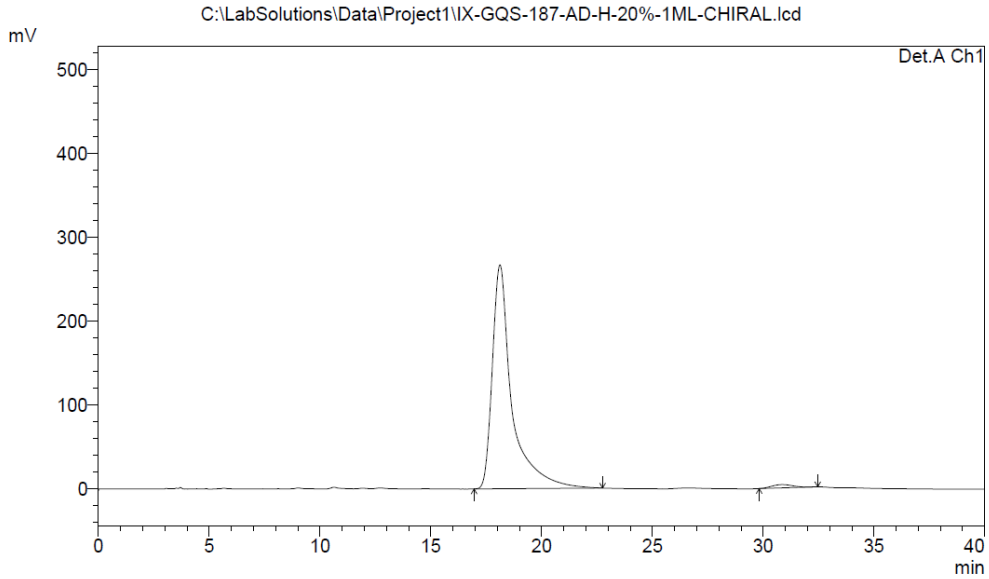

PeakTable

Detector A Ch1 254nm

| Peak# | Ret. Time | Area     | Height | Area %  | Height % |
|-------|-----------|----------|--------|---------|----------|
| 1     | 18.115    | 16382736 | 267174 | 98.441  | 98.527   |
| 2     | 30.841    | 259514   | 3994   | 1.559   | 1.473    |
| Total |           | 16642250 | 271168 | 100.000 | 100.000  |

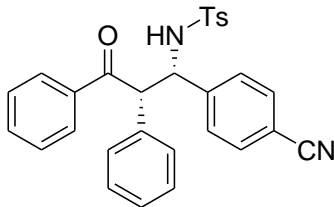

(2S,3S)-3-(4-Cyanophenyl)-1,2-diphenyl-3-(tosylamino)propan-1-one (**4g**)

==== Shimadzu LCsolution LC Data Image ====

<Chromatogram>

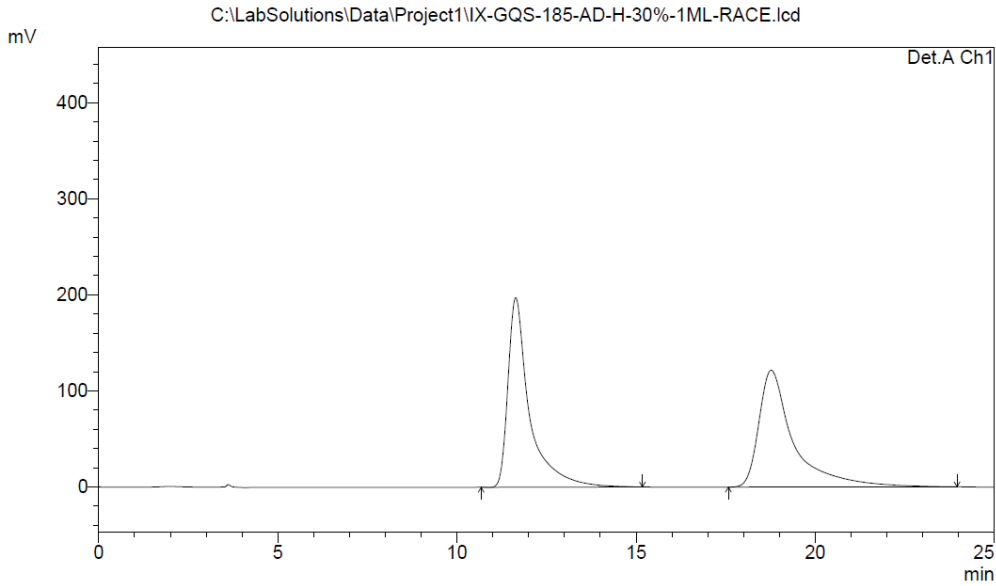

PeakTable

Detector A Ch1 254nm

| Peak# | Ret. Time | Area     | Height | Area %  | Height % |
|-------|-----------|----------|--------|---------|----------|
| 1     | 11.634    | 8247231  | 197295 | 50.139  | 61.866   |
| 2     | 18.765    | 8201376  | 121613 | 49.861  | 38.134   |
| Total |           | 16448607 | 318909 | 100.000 | 100.000  |

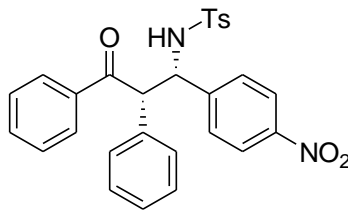

(2S\*,3S\*)-3-(4-Nitrophenyl)-1,2-diphenyl-3-(tosylamino)propan-1-one (**4h**)

==== Shimadzu LCsolution LC Data Image ====

<Chromatogram>

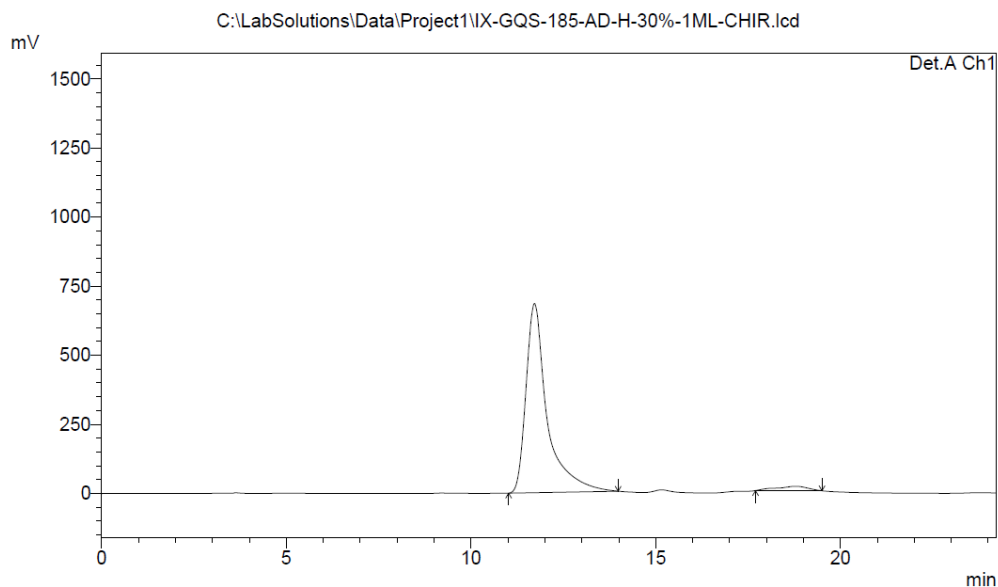

PeakTable

Detector A Ch1 254nm

| Peak# | Ret. Time | Area     | Height | Area %  | Height % |
|-------|-----------|----------|--------|---------|----------|
| 1     | 11.713    | 27291599 | 684751 | 96.620  | 97.725   |
| 2     | 18.778    | 954824   | 15942  | 3.380   | 2.275    |
| Total |           | 28246424 | 700692 | 100.000 | 100.000  |

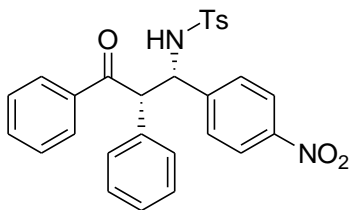

(2S,3S)-3-(4-Nitrophenyl)-1,2-diphenyl-3-(tosylamino)propan-1-one (**4h**)

==== Shimadzu LCsolution LC Data Image ====

<Chromatogram>

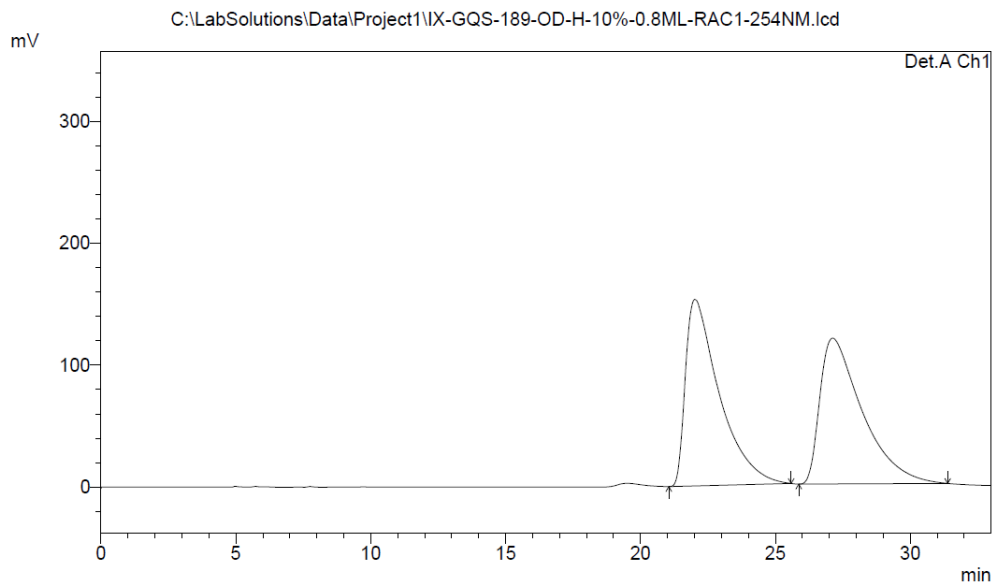

PeakTable

Detector A Ch1 254nm

| Peak# | Ret. Time | Area     | Height | Area %  | Height % |
|-------|-----------|----------|--------|---------|----------|
| 1     | 22.016    | 13375907 | 153213 | 50.605  | 56.147   |
| 2     | 27.119    | 13056081 | 119664 | 49.395  | 43.853   |
| Total |           | 26431988 | 272877 | 100.000 | 100.000  |

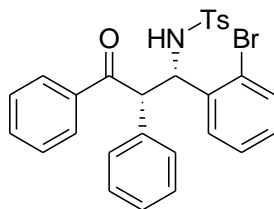

(2*S*\*,3*S*\*)-3-(2-Bromophenyl)-1,2-diphenyl-3-(tosylamino)propan-1-one (**4i**)

==== Shimadzu LCsolution LC Data Image ====

<Chromatogram>

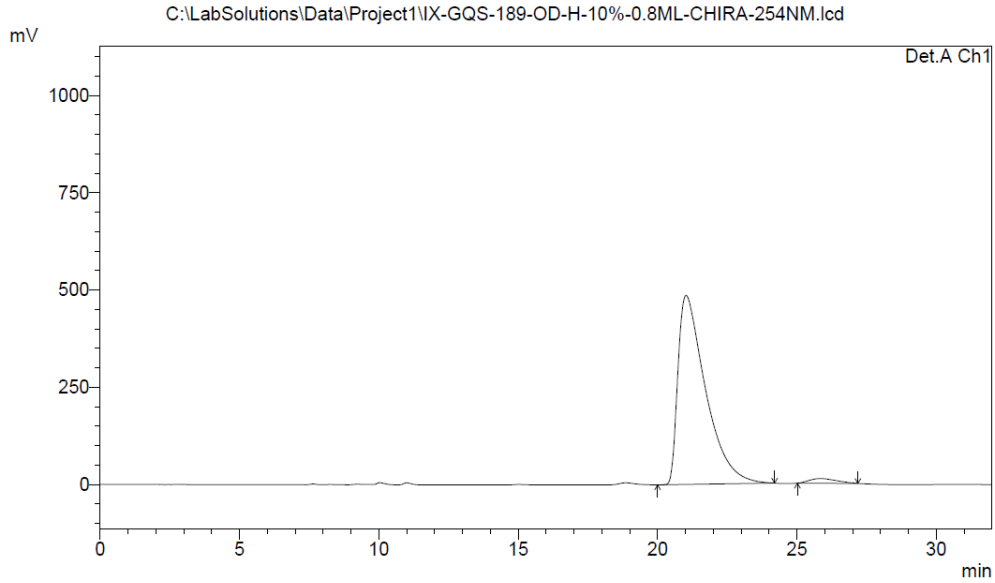

PeakTable

Detector A Ch1 254nm

| Peak# | Ret. Time | Area     | Height | Area %  | Height % |
|-------|-----------|----------|--------|---------|----------|
| 1     | 21.020    | 33445334 | 485967 | 97.625  | 97.581   |
| 2     | 25.838    | 813606   | 12049  | 2.375   | 2.419    |
| Total |           | 34258941 | 498015 | 100.000 | 100.000  |

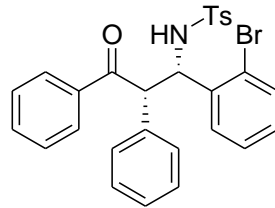

(2S,3S)-3-(2-Bromophenyl)-1,2-diphenyl-3-(tosylamino)propan-1-one (**4i**)



==== Shimadzu LCsolution LC Data Image ====

<Chromatogram>

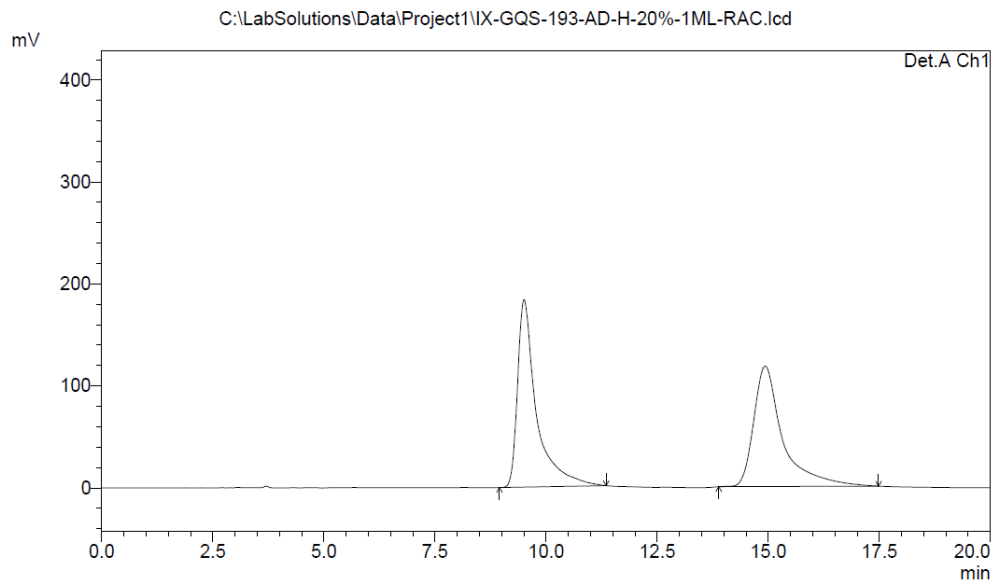

PeakTable

Detector A Ch1 254nm

| Peak# | Ret. Time | Area     | Height | Area %  | Height % |
|-------|-----------|----------|--------|---------|----------|
| 1     | 9.499     | 5446505  | 183957 | 50.392  | 60.899   |
| 2     | 14.926    | 5361820  | 118112 | 49.608  | 39.101   |
| Total |           | 10808326 | 302069 | 100.000 | 100.000  |

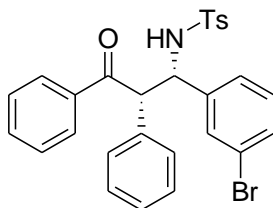

(2S\*,3S\*)-3-(3-Bromophenyl)-1,2-diphenyl-3-(tosylamino)propan-1-one (**4j**)

==== Shimadzu LCsolution LC Data Image ====

<Chromatogram>

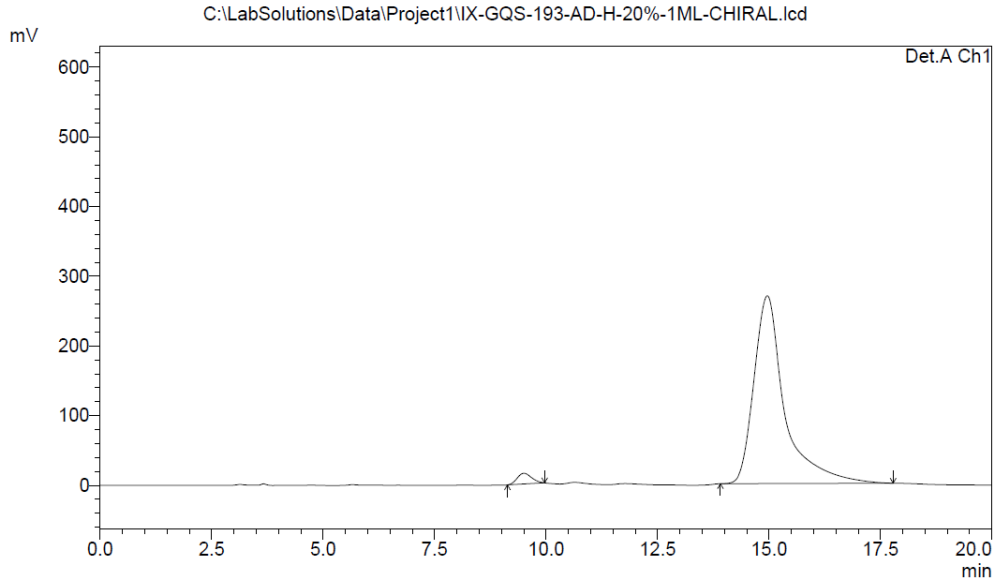

PeakTable

Detector A Ch1 254nm

| Peak# | Ret. Time | Area     | Height | Area %  | Height % |
|-------|-----------|----------|--------|---------|----------|
| 1     | 9.498     | 348207   | 15438  | 2.630   | 5.421    |
| 2     | 14.957    | 12893439 | 269348 | 97.370  | 94.579   |
| Total |           | 13241646 | 284786 | 100.000 | 100.000  |

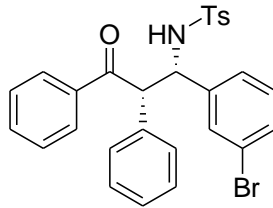

(2S,3S)-3-(3-Bromophenyl)-1,2-diphenyl-3-(tosylamino)propan-1-one (4j)

==== Shimadzu LCsolution LC Data Image ====

<Chromatogram>

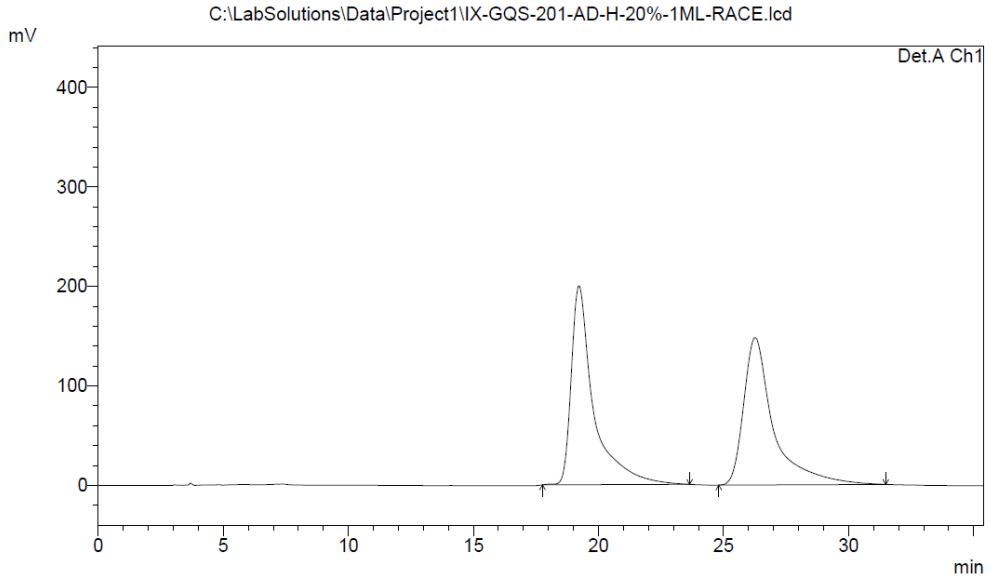

PeakTable

Detector A Ch1 254nm

| Peak# | Ret. Time | Area     | Height | Area %  | Height % |
|-------|-----------|----------|--------|---------|----------|
| 1     | 19.212    | 12477502 | 200111 | 50.346  | 57.455   |
| 2     | 26.257    | 12305804 | 148181 | 49.654  | 42.545   |
| Total |           | 24783307 | 348292 | 100.000 | 100.000  |

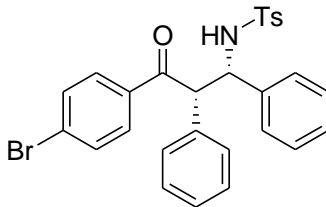

(2S\*,3S\*)-1-(4-Bromophenyl)-2,3-diphenyl-3-(tosylamino)propan-1-one (**4k**)

==== Shimadzu LCsolution LC Data Image ====

<Chromatogram>

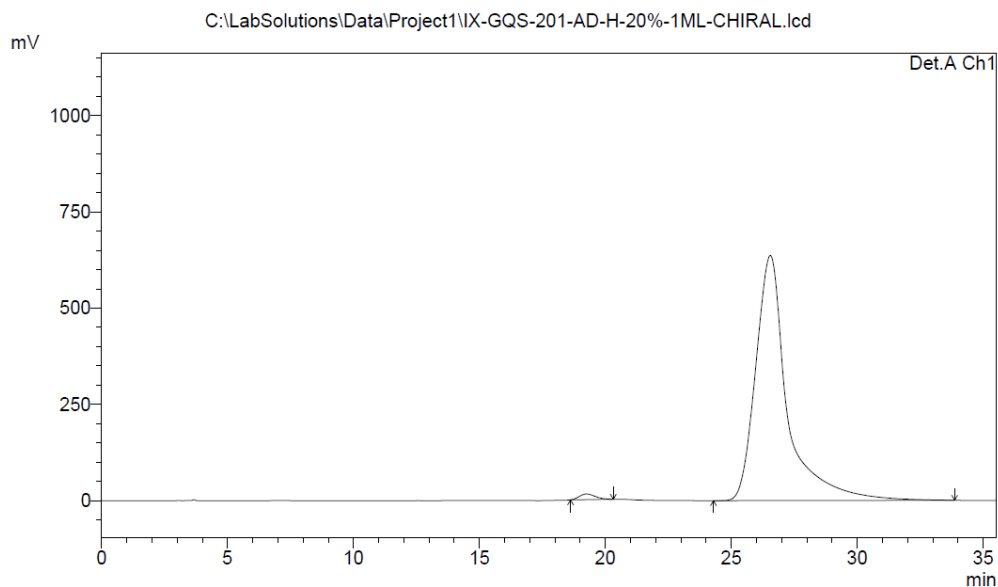

PeakTable

| Peak# | Ret. Time | Area     | Height | Area %  | Height % |
|-------|-----------|----------|--------|---------|----------|
| 1     | 19.251    | 652474   | 14801  | 1.158   | 2.271    |
| 2     | 26.544    | 55716684 | 636845 | 98.842  | 97.729   |
| Total |           | 56369158 | 651646 | 100.000 | 100.000  |

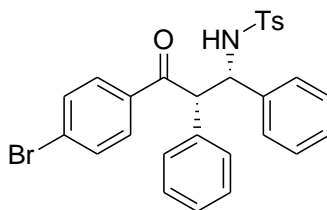

(2S,3S)-1-(4-Bromophenyl)-2,3-diphenyl-3-(tosylamino)propan-1-one (**4k**)

==== Shimadzu LCsolution LC Data Image ====

<Chromatogram>

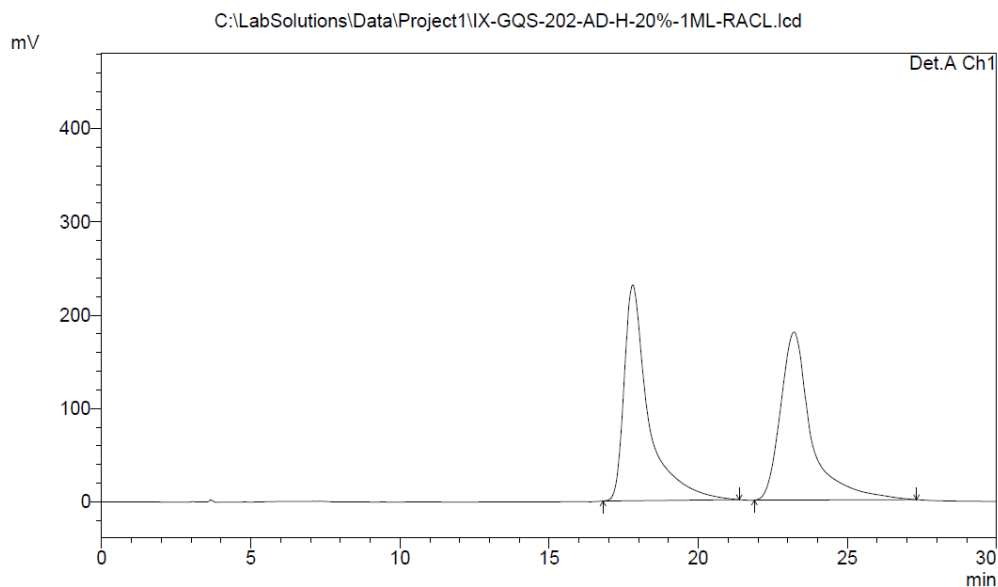

PeakTable

| Peak# | Ret. Time | Area     | Height | Area %  | Height % |
|-------|-----------|----------|--------|---------|----------|
| 1     | 17.798    | 13110430 | 231275 | 50.348  | 56.214   |
| 2     | 23.206    | 12929169 | 180144 | 49.652  | 43.786   |
| Total |           | 26039599 | 411419 | 100.000 | 100.000  |

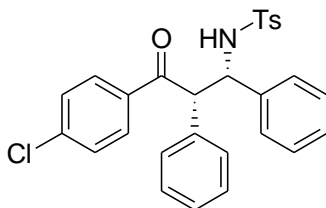

(2S\*,3S\*)-1-(4-Chlorophenyl)-2,3-diphenyl-3-(tosylamino)propan-1-one (**41**)

==== Shimadzu LCsolution LC Data Image ====

<Chromatogram>

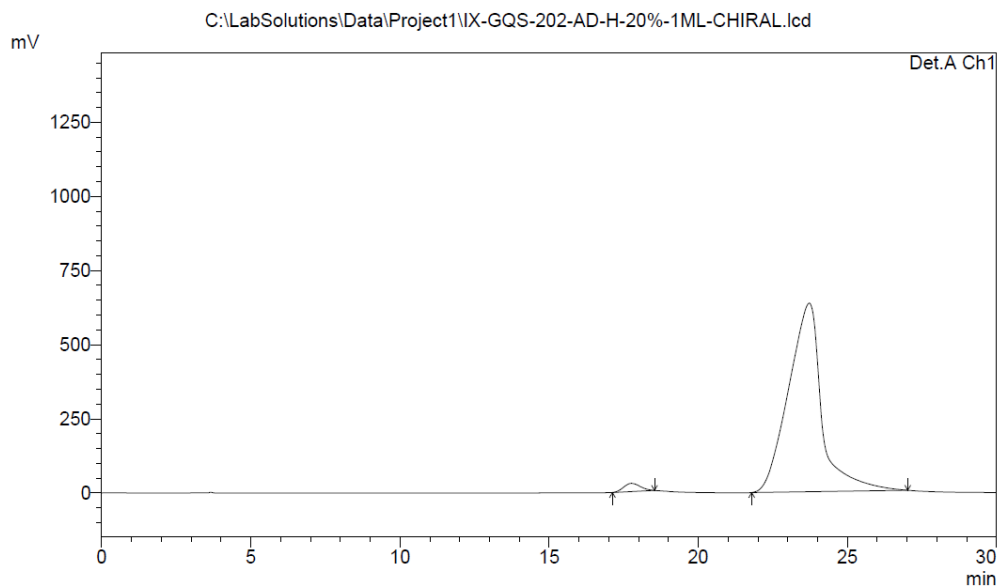

PeakTable

Detector A Ch1 254nm

| Peak# | Ret. Time | Area     | Height | Area %  | Height % |
|-------|-----------|----------|--------|---------|----------|
| 1     | 17.765    | 1085225  | 27875  | 2.145   | 4.197    |
| 2     | 23.718    | 49509062 | 636240 | 97.855  | 95.803   |
| Total |           | 50594288 | 664115 | 100.000 | 100.000  |

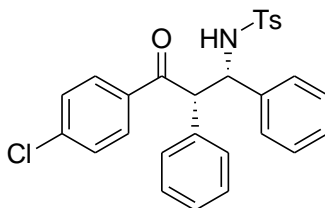

(2S,3S)-1-(4-Chlorophenyl)-2,3-diphenyl-3-(tosylamino)propan-1-one (**4I**)

==== Shimadzu LCsolution LC Data Image ====

<Chromatogram>

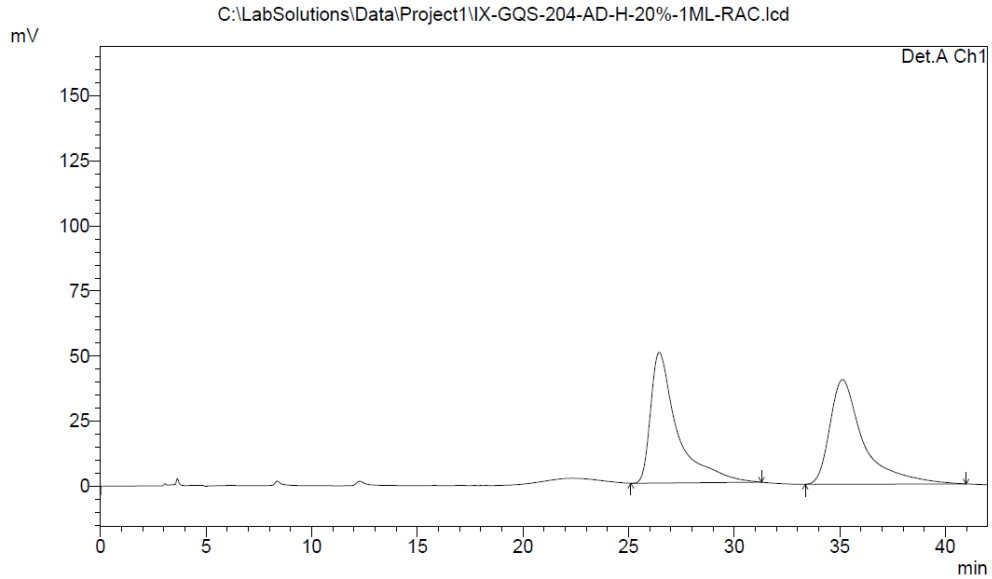

PeakTable

Detector A Ch1 254nm

| Peak# | Ret. Time | Area    | Height | Area %  | Height % |
|-------|-----------|---------|--------|---------|----------|
| 1     | 26.445    | 4434461 | 50298  | 49.932  | 55.557   |
| 2     | 35.122    | 4446542 | 40236  | 50.068  | 44.443   |
| Total |           | 8881002 | 90533  | 100.000 | 100.000  |

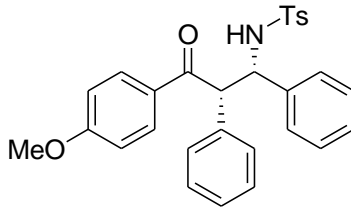

(2S\*,3S\*)-1-(4-Methoxyphenyl)-2,3-diphenyl-3-(tosylamino)propan-1-one (4m)

==== Shimadzu LCsolution LC Data Image ====

<Chromatogram>

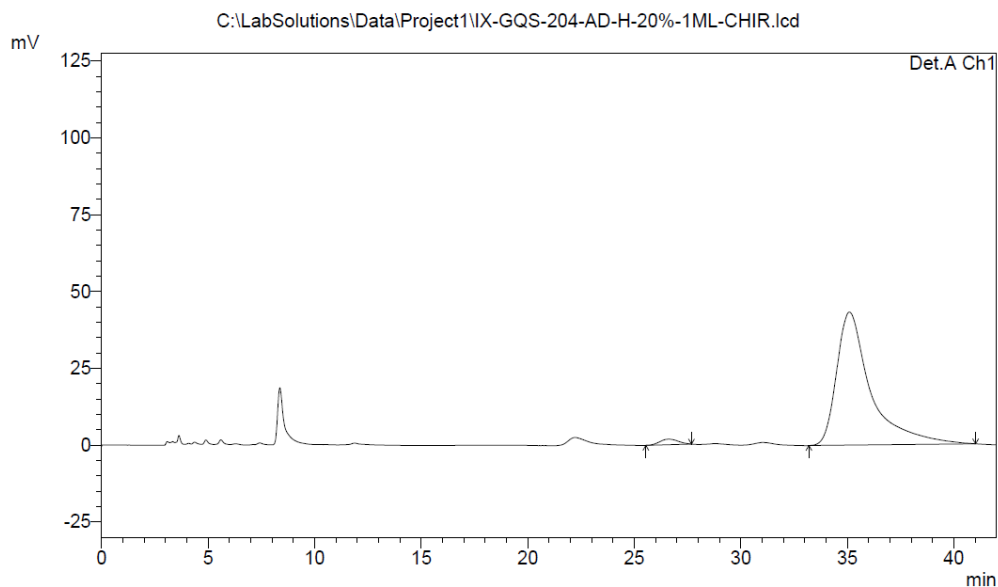

PeakTable

| Peak# | Ret. Time | Area    | Height | Area %  | Height % |
|-------|-----------|---------|--------|---------|----------|
| 1     | 26.628    | 109477  | 1825   | 2.219   | 4.046    |
| 2     | 35.092    | 4825087 | 43288  | 97.781  | 95.954   |
| Total |           | 4934564 | 45113  | 100.000 | 100.000  |

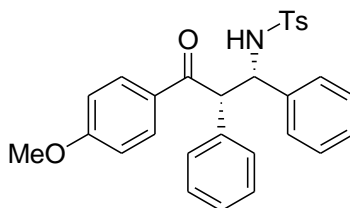

(2S,3S)-1-(4-Methoxyphenyl)-2,3-diphenyl-3-(tosylamino)propan-1-one (**4m**)



==== Shimadzu LCsolution LC Data Image ====

<Chromatogram>

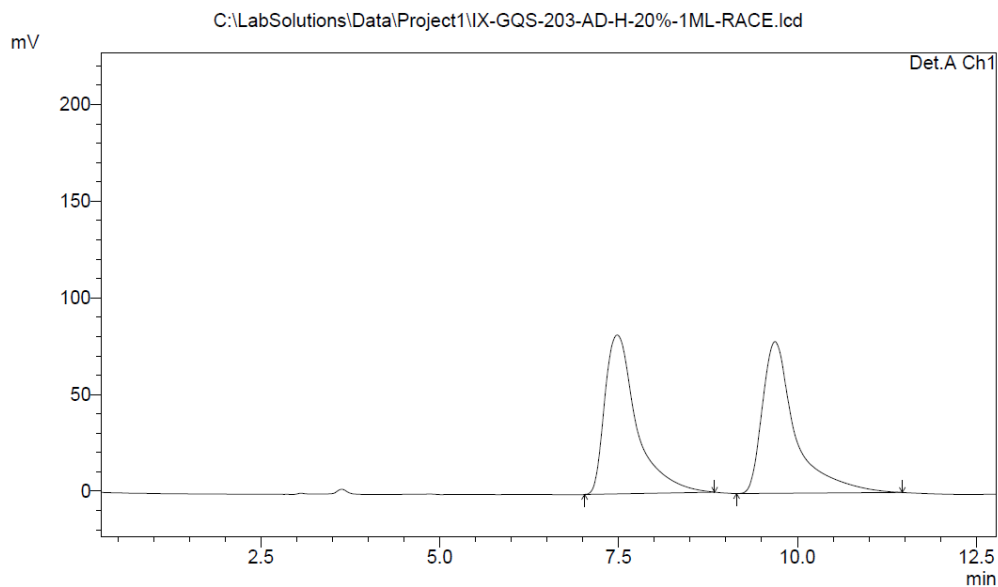

PeakTable

Detector A Ch1 254nm

| Peak# | Ret. Time | Area    | Height | Area %  | Height % |
|-------|-----------|---------|--------|---------|----------|
| 1     | 7.477     | 2537920 | 82171  | 50.192  | 51.146   |
| 2     | 9.683     | 2518499 | 78490  | 49.808  | 48.854   |
| Total |           | 5056419 | 160661 | 100.000 | 100.000  |

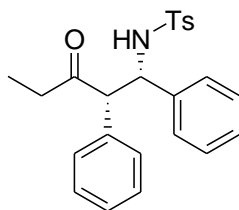

(1S\*,2S\*)-1,2-diphenyl-1-(tosylamino)pentan-3-one (**4n**)

==== Shimadzu LCsolution LC Data Image ====

<Chromatogram>

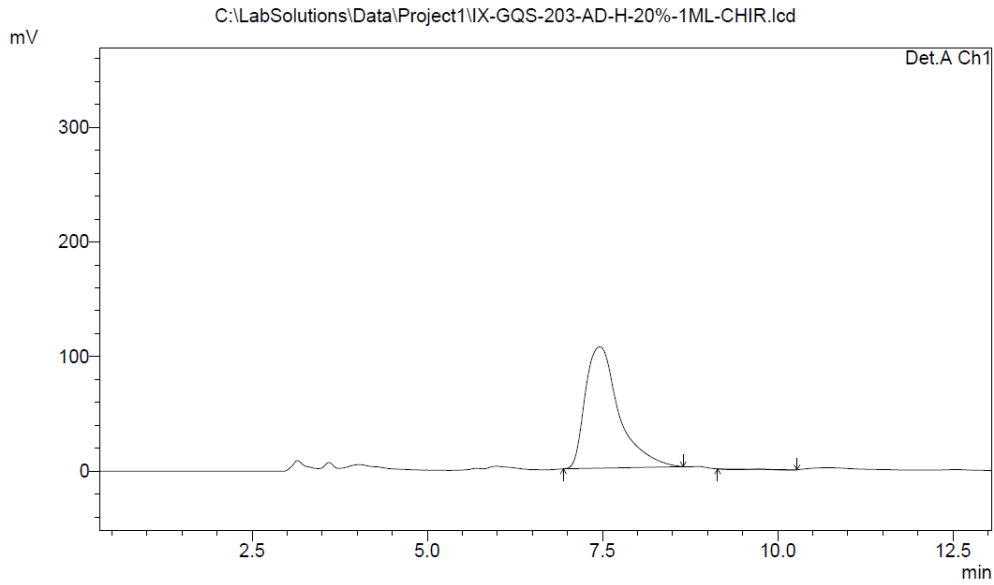

PeakTable

Detector A Ch1 254nm

| Peak# | Ret. Time | Area    | Height | Area %  | Height % |
|-------|-----------|---------|--------|---------|----------|
| 1     | 7.458     | 3543104 | 106018 | 100.311 | 100.035  |
| 2     | 9.150     | -10999  | -37    | -0.311  | -0.035   |
| Total |           | 3532105 | 105982 | 100.000 | 100.000  |

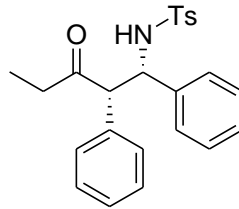

(1S,2S)-1,2-diphenyl-1-(tosylamino)pentan-3-one (**4n**)

==== Shimadzu LCsolution LC Data Image ====

<Chromatogram>

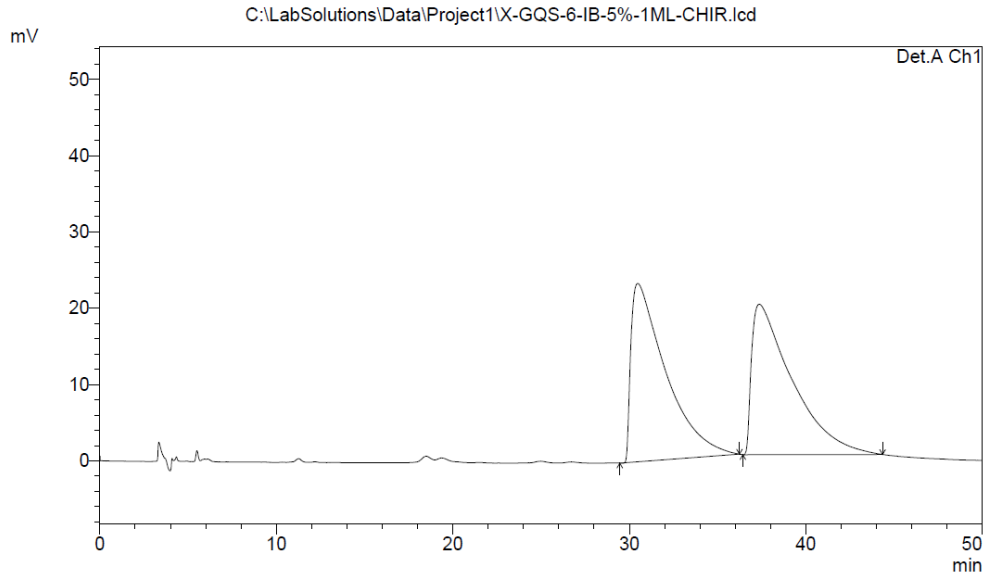

PeakTable

| Peak# | Ret. Time | Area    | Height | Area %  | Height % |
|-------|-----------|---------|--------|---------|----------|
| 1     | 30.467    | 3203020 | 23371  | 50.450  | 54.237   |
| 2     | 37.353    | 3145888 | 19720  | 49.550  | 45.763   |
| Total |           | 6348908 | 43091  | 100.000 | 100.000  |

Detector A Ch1 254nm

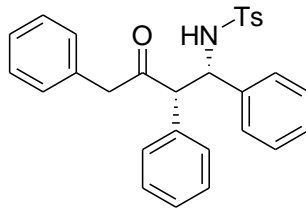

(3*S*\*,4*S*\*)-1,3,4-Triphenyl-4-(tosylamino)butan-2-one (**4o**)

==== Shimadzu LCsolution LC Data Image ====

<Chromatogram>

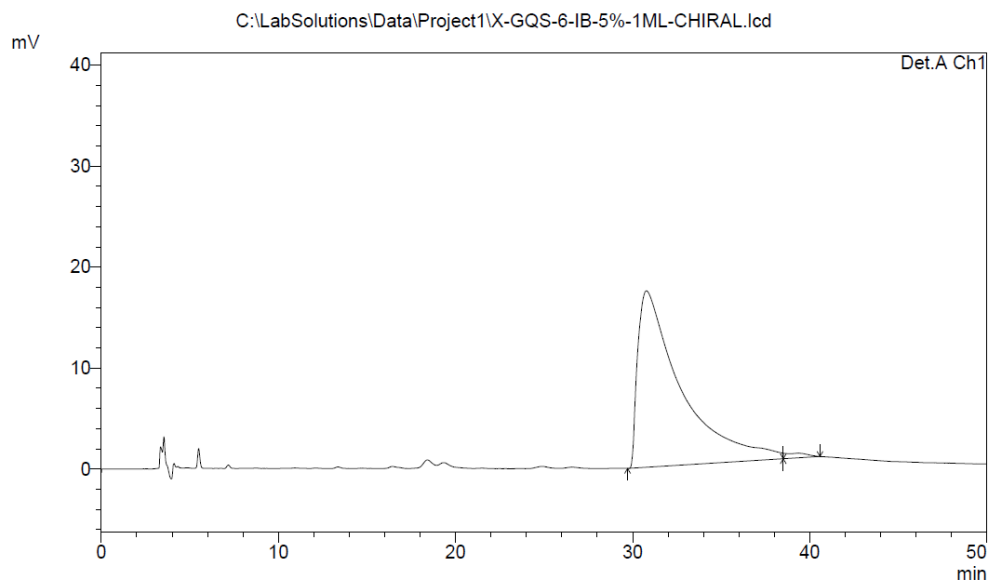

PeakTable

Detector A Ch1 254nm

| Peak# | Ret. Time | Area    | Height | Area %  | Height % |
|-------|-----------|---------|--------|---------|----------|
| 1     | 30.763    | 2969879 | 17485  | 98.643  | 97.411   |
| 2     | 39.346    | 40849   | 465    | 1.357   | 2.589    |
| Total |           | 3010728 | 17950  | 100.000 | 100.000  |

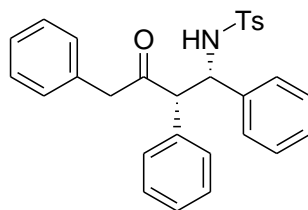

(3S,4S)-1,3,4-Triphenyl-4-(tosylamino)butan-2-one (**4o**)

==== Shimadzu LCsolution LC Data Image ====

<Chromatogram>

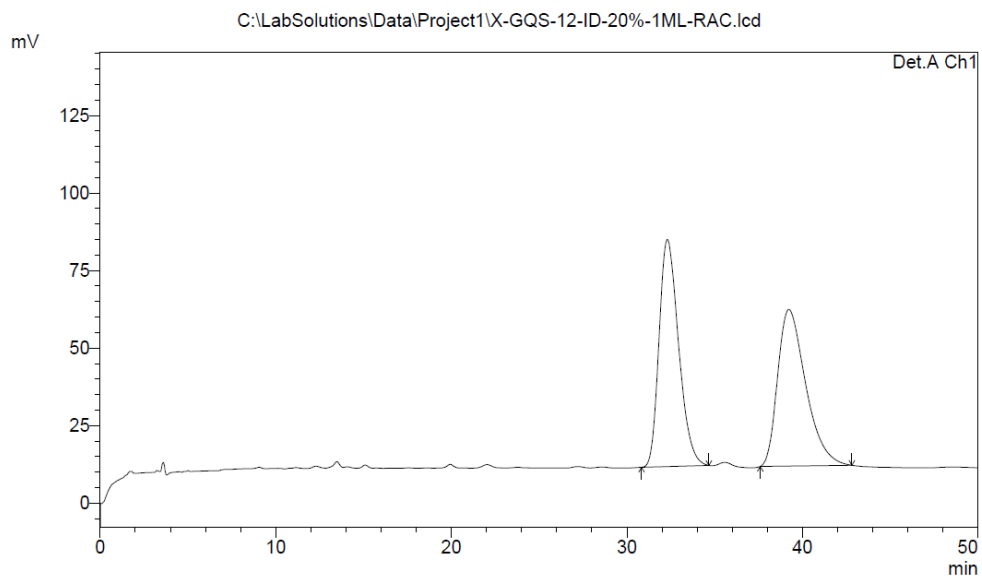

PeakTable

Detector A Ch1 254nm

| Peak# | Ret. Time | Area     | Height | Area %  | Height % |
|-------|-----------|----------|--------|---------|----------|
| 1     | 32.297    | 5671834  | 73220  | 50.329  | 59.173   |
| 2     | 39.218    | 5597617  | 50520  | 49.671  | 40.827   |
| Total |           | 11269451 | 123740 | 100.000 | 100.000  |

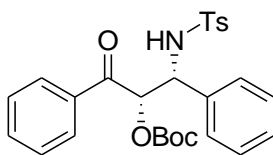

(2S\*,3R\*)-2-*tert*-Butoxycarbonyloxy-1,3-diphenyl-3-(tosylamino)propan-1-one (**4p**)

==== Shimadzu LCsolution LC Data Image ====

<Chromatogram>

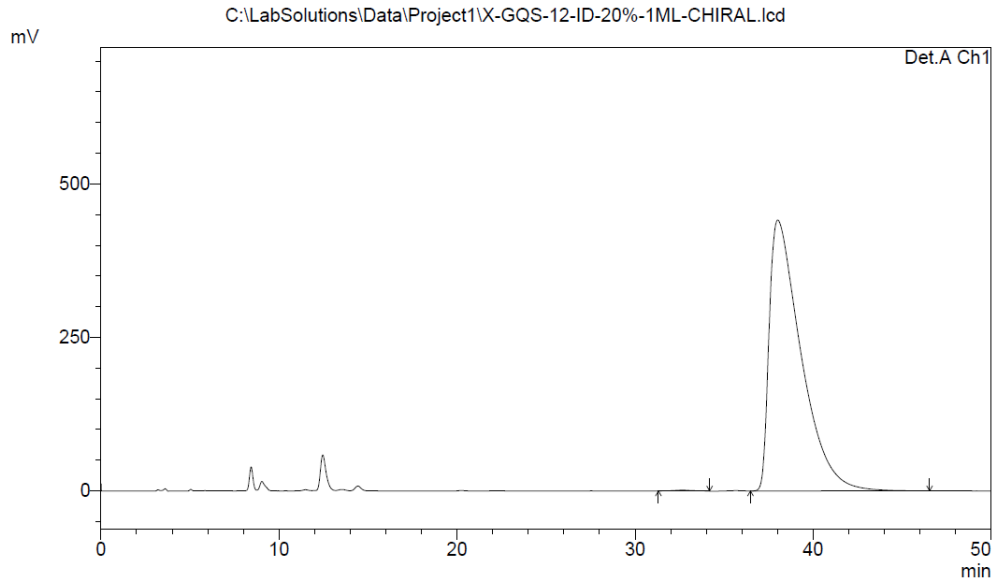

PeakTable

| Peak# | Ret. Time | Area     | Height | Area %  | Height % |
|-------|-----------|----------|--------|---------|----------|
| 1     | 32.666    | 83352    | 1136   | 0.152   | 0.257    |
| 2     | 38.005    | 54671347 | 441221 | 99.848  | 99.743   |
| Total |           | 54754699 | 442357 | 100.000 | 100.000  |

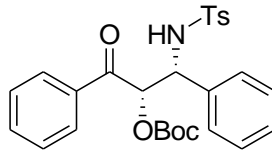

(2*S*,3*R*)-2-*tert*-Butoxycarbonyloxy-1,3-diphenyl-3-(tosylamino)propan-1-one (**4p**)

==== Shimadzu LCsolution LC Data Image ====

<Chromatogram>

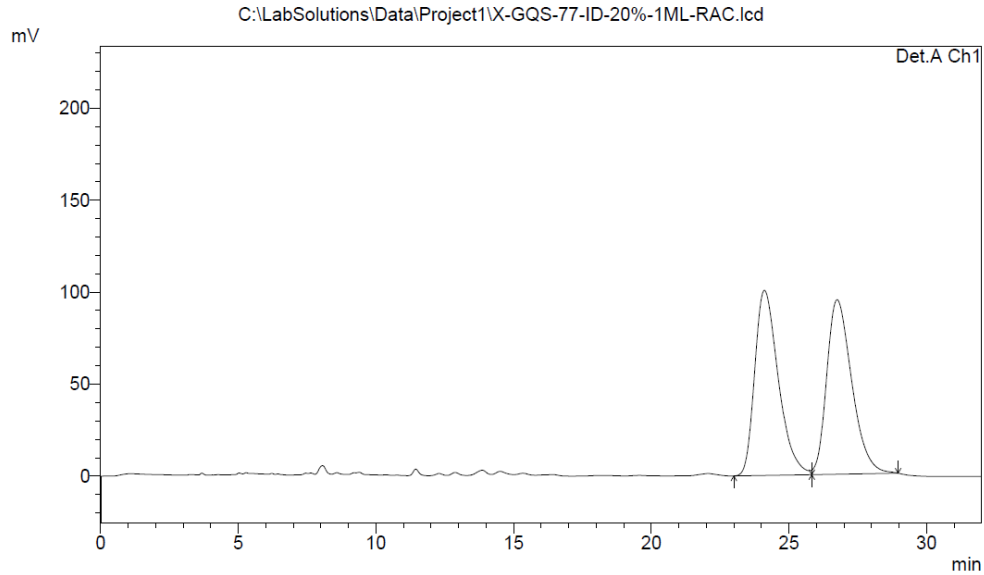

PeakTable

Detector A Ch1 254nm

| Peak# | Ret. Time | Area     | Height | Area %  | Height % |
|-------|-----------|----------|--------|---------|----------|
| 1     | 24.106    | 6002035  | 100604 | 49.995  | 51.465   |
| 2     | 26.746    | 6003312  | 94876  | 50.005  | 48.535   |
| Total |           | 12005348 | 195480 | 100.000 | 100.000  |

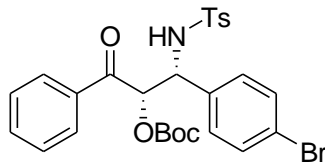

(2S\*,3R\*)-3-(4-Bromophenyl)-2-tert-butoxycarbonyloxy-1-phenyl-3-(tosylamino)propan-1-one (**4q**)

==== Shimadzu LCsolution LC Data Image ====

<Chromatogram>

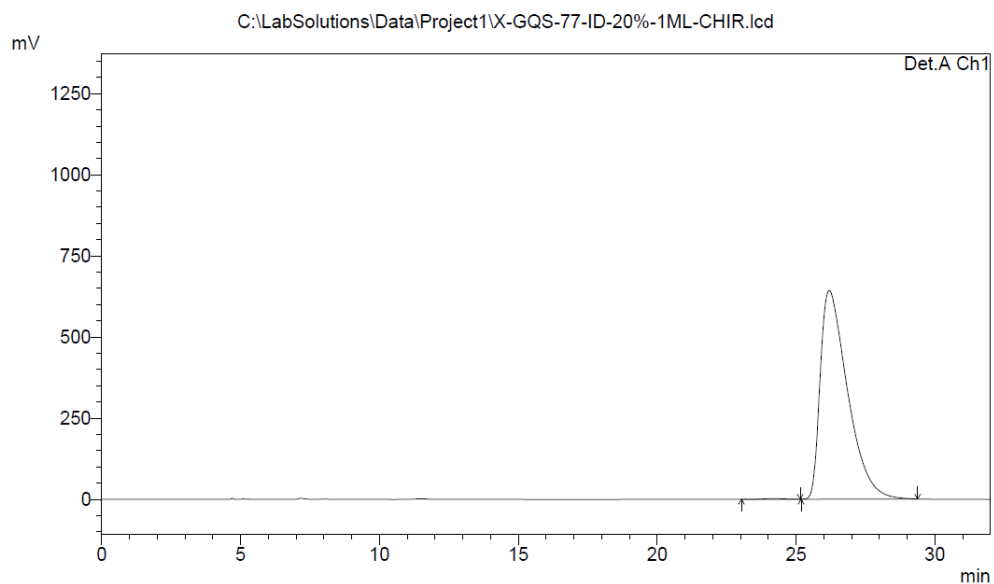

PeakTable

Detector A Ch1 254nm

| Peak# | Ret. Time | Area     | Height | Area %  | Height % |
|-------|-----------|----------|--------|---------|----------|
| 1     | 24.187    | 119566   | 2452   | 0.271   | 0.380    |
| 2     | 26.191    | 43980714 | 643067 | 99.729  | 99.620   |
| Total |           | 44100280 | 645519 | 100.000 | 100.000  |

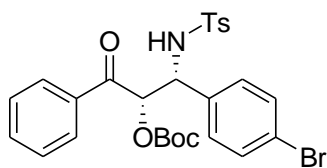

(2S,3R)-3-(4-Bromophenyl)-2-tert-butoxycarbonyloxy-1-phenyl-3-(tosylamino)propan-1-one (**4q**)



==== Shimadzu LCsolution LC Data Image ====

<Chromatogram>

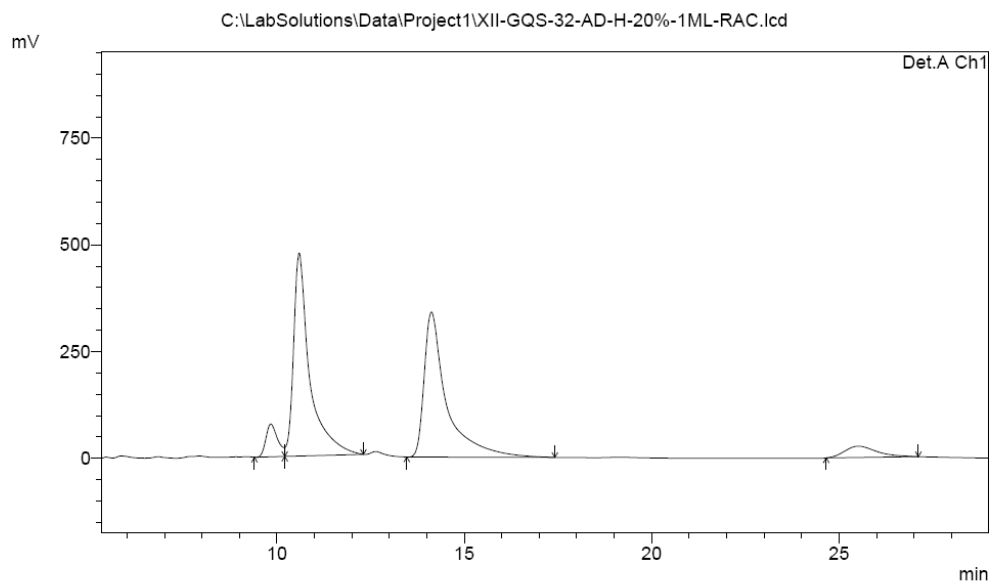

PeakTable

| Peak# | Ret. Time | Area     | Height | Area %  | Height % |
|-------|-----------|----------|--------|---------|----------|
| 1     | 9.832     | 1683615  | 76906  | 5.332   | 8.370    |
| 2     | 10.589    | 14204273 | 475531 | 44.982  | 51.755   |
| 3     | 14.118    | 14110300 | 339922 | 44.684  | 36.996   |
| 4     | 25.514    | 1579808  | 26446  | 5.003   | 2.878    |
| Total |           | 31577995 | 918805 | 100.000 | 100.000  |

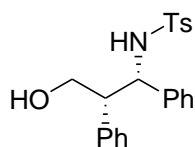

(2*S*\*,3*S*\*)-2,3-diphenyl-3-(tosylamino)propan-1-ol (**13**)

==== Shimadzu LCsolution LC Data Image ====

<Chromatogram>

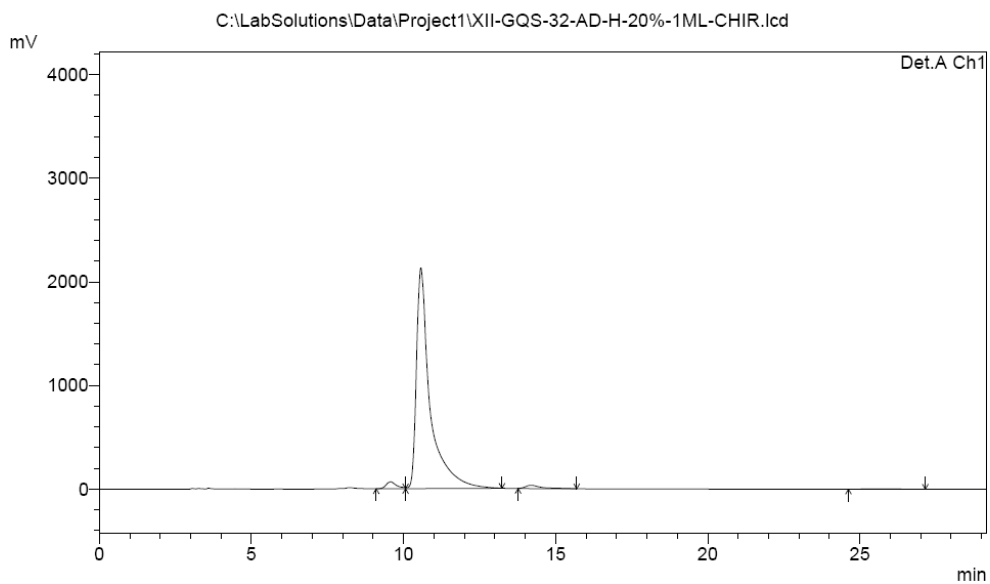

PeakTable

Detector A Ch1 210nm

| Peak# | Ret. Time | Area     | Height  | Area %  | Height % |
|-------|-----------|----------|---------|---------|----------|
| 1     | 9.562     | 1597884  | 67575   | 2.295   | 3.030    |
| 2     | 10.566    | 66839718 | 2129399 | 95.979  | 95.495   |
| 3     | 14.189    | 1127268  | 31614   | 1.619   | 1.418    |
| 4     | 25.589    | 74885    | 1273    | 0.108   | 0.057    |
| Total |           | 69639755 | 2229860 | 100.000 | 100.000  |

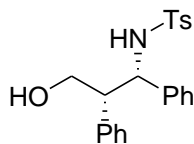

(2S,3S)-2,3-diphenyl-3-(tosylamino)propan-1-ol (**13**)

==== Shimadzu LCsolution LC Data Image ====

<Chromatogram>

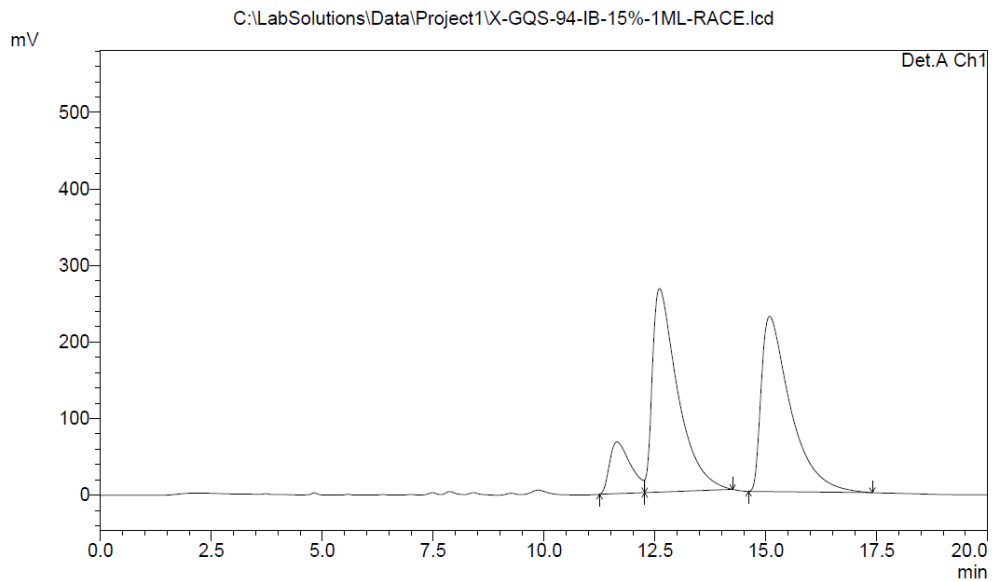

PeakTable

Detector A Ch1 254nm

| Peak# | Ret. Time | Area     | Height | Area %  | Height % |
|-------|-----------|----------|--------|---------|----------|
| 1     | 11.641    | 2231003  | 67492  | 9.564   | 12.001   |
| 2     | 12.598    | 10591854 | 265873 | 45.404  | 47.275   |
| 3     | 15.080    | 10505411 | 229029 | 45.033  | 40.724   |
| Total |           | 23328269 | 562394 | 100.000 | 100.000  |

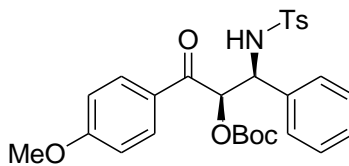

(2R\*,3S\*)-2-tert-Butoxycarbonyloxy-1-(4-methoxyphenyl)-3-phenyl-3-(tosylamino)propan-1-one (4r)

==== Shimadzu LCsolution LC Data Image ====

<Chromatogram>

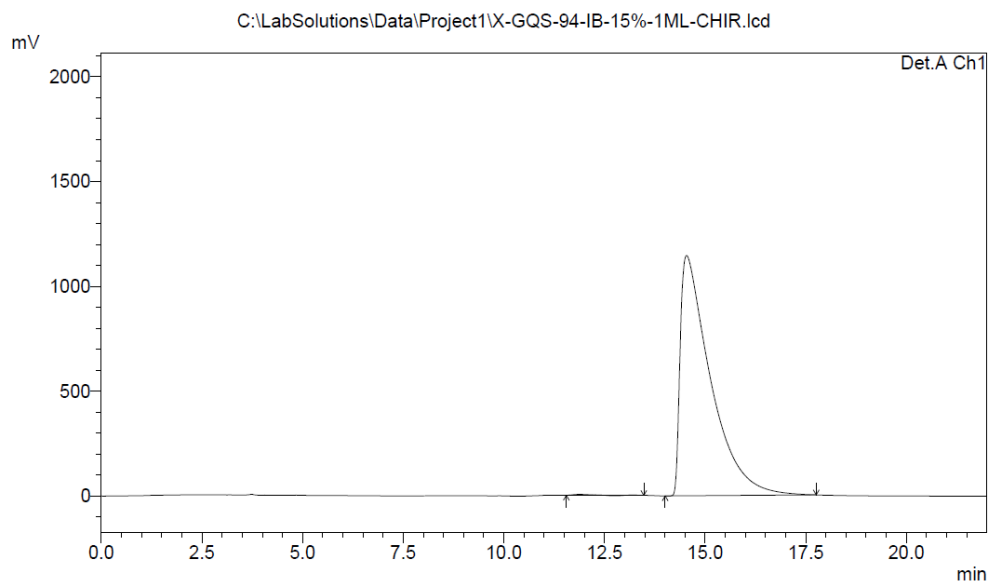

PeakTable

| Peak# | Ret. Time | Area     | Height  | Area %  | Height % |
|-------|-----------|----------|---------|---------|----------|
| 1     | 11.881    | 132035   | 4468    | 0.220   | 0.388    |
| 2     | 14.535    | 59814362 | 1146054 | 99.780  | 99.612   |
| Total |           | 59946397 | 1150523 | 100.000 | 100.000  |

Detector A Ch1 254nm

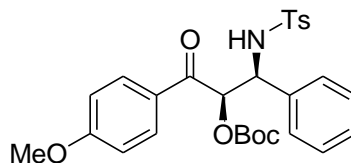

(2*R*,3*S*)-2-*tert*-Butoxycarbonyloxy-1-(4-methoxyphenyl)-3-phenyl-3-(tosylamino)propan-1-one (**4r**)
